# Supplementary material
Source: publisher figshare collection journal article supplement (https://acs.figshare.com/ndownloader/files/4628791)
Supplement: Supplementary file 1 [file 4628791]

# Synthesis of an Advanced Intermediate for (+)-Pillaromycinone. Staunton-Weinreb Annulation Revisited

*James D. White,\* F.W.J. Demnitz, Qing Xu, and William H.C. Martin*

Department of Chemistry, Oregon State University, Corvallis, Oregon 97331-4003.

*james.white@oregonstate.edu*

## SUPPORTING INFORMATION

|                                                                                                               |         |
|---------------------------------------------------------------------------------------------------------------|---------|
| Table of Contents                                                                                             | S1      |
| • General techniques                                                                                          | S2      |
| • Experimental procedures for <b>8, 9, 10, 11, 12, 13, 14, 15, 16, 18, 19, 24, 26, 27, 29, 30, 31, 32, 34</b> | S3-S19  |
| • <sup>1</sup> H and <sup>13</sup> C NMR spectra of characterized compounds                                   | S21-S62 |

**General techniques:** All reactions requiring anhydrous conditions were conducted in flame-dried glass apparatus under an atmosphere of argon. THF, Et<sub>2</sub>O, CH<sub>2</sub>Cl<sub>2</sub>, DMF, benzene and acetonitrile were dried by passage through an activated alumina column under argon. DMSO was distilled from CaH<sub>2</sub> at 15 mm Hg and stored over activated 4Å molecular sieves.

Anhydrous MeOH was freshly distilled from magnesium ethoxide. Preparative chromatographic separations were performed on silica gel (35-75 µm); reactions were followed by TLC analysis using silica plates with fluorescent indicator (254 nm) and visualized with a UV lamp or phosphomolybdic acid. All commercially available reagents were purchased from Aldrich and used as received unless stated otherwise.

Optical rotations were measured with a polarimeter using a 1 mL capacity cell with 1 dm path length. Infrared spectra were recorded using a thin film supported on KBr discs or dispersed in a KBr pellet. <sup>1</sup>H and <sup>13</sup>C NMR spectra were recorded in Fourier transform mode at the field strength specified on either a 300 or 400 MHz spectrometer. Spectra were obtained on CDCl<sub>3</sub> solutions in 5 mm diameter tubes, and chemical shifts in ppm are quoted relative to the residual signals of chloroform (δ<sub>H</sub> 7.26 ppm, or δ<sub>C</sub> 77.0 ppm). Multiplicities in the <sup>1</sup>H NMR spectra are described as: s = singlet, d = doublet, t = triplet, q = quartet, m = multiplet, br = broad; coupling constants are reported in Hz. Low (MS) and high (HRMS) resolution mass spectra are reported with ion mass/charge (*m/z*) ratios as values in atomic mass units.

## EXPERIMENTAL SECTION

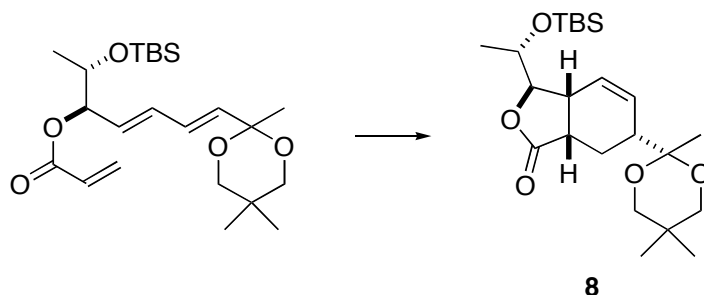

**Lactone 8.** A solution of the acrylate<sup>8</sup> (2.57 g, 6.06 mmol) in toluene (60 mL) containing 2,6-di-*tert*-butyl-4-methylphenol (100 mg) was heated in a sealed tube at 230 °C for 55 h. The solvent was evaporated leaving a yellow solid which was passed through a column of silica gel (hexane:EtOAc 85:15) to give a mixture of **8** and its trans fused isomer (1.29 g) as a colorless solid. The solid was taken up into benzene (50 mL) and NaH (7.4 mg, 0.1 mol%) and diisopropylethylamine (1.0 mg) were added. The mixture was heated at reflux for 12 h, after which the solvent was removed to leave a colorless crystalline solid. Recrystallization from hexane gave **8** (1.28 g, 50%) as colorless needles: mp 111-112 °C;  $[\alpha]_D^{23} +20.8$  (c 1.2 CHCl<sub>3</sub>); <sup>1</sup>H NMR (CDCl<sub>3</sub>) δ 0.08 (3H, s), 0.09 (3H, s), 0.86 (3H, s), 0.88 (9H, s), 1.05 (3H, s), 1.22 (3H, d, *J* = 6 Hz), 1.34 (3H, s), 1.48 (1H, ddd, *J* = 13, 13, 11 Hz), 2.23 (1H, ddd, *J* = 13, 5.5 Hz), 2.56 (1H, m), 2.77 (1H, ddd, *J* = 13, 9.5 Hz), 3.08 (1H, m), 3.42 (2H, d, *J* = 12 Hz), 3.59 (1H, d, *J* = 12 Hz), 3.61 (1H, d, *J* = 12 Hz), 4.07 (2H, m), 5.76 (1H, ddd, *J* = 10, 3, 3 Hz), 6.01 (1H, d, *J* = 10 Hz); <sup>13</sup>C NMR (CDCl<sub>3</sub>) δ -4.7, -4.6, 16.7, 18.0, 20.2, 22.5, 23.0, 23.6, 25.8, 30.0, 35.1, 39.7, 42.2, 69.0, 70.1, 70.4, 87.2, 99.6, 126.5, 129.8, 178.5; HRMS *m/z* 409.2408 (*M*<sup>+</sup> -15, calcd for C<sub>22</sub>H<sub>37</sub>O<sub>5</sub>Si *m/z* 409.2410). Anal. Calcd for C<sub>23</sub>H<sub>40</sub>O<sub>5</sub>Si: C, 65.05; H, 9.49. Found: C, 64.85; H, 9.26

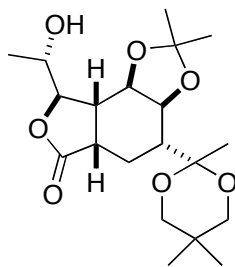

9

**Alcohol 9.** A solution of **8** (23 mg, 0.054 mol), N-methylmorpholine-N-oxide (14 mg, 0.119 mol) and OsO<sub>4</sub> (0.046M in *t*-BuOH, 0.06 mL, 0.0027 mmol) in THF (1 mL) and H<sub>2</sub>O (0.2 mL) was stirred at room temperature for 21 h. The reaction was quenched with an aqueous slurry of Na<sub>2</sub>S<sub>2</sub>O<sub>3</sub> and Celite, and the resulting mixture was stirred vigorously for 10 min and was filtered. The filtrate was extracted with EtOAc (5x), the extract was washed with 1M HCl and then with satd. aqueous NaHCO<sub>3</sub>, and was dried (MgSO<sub>4</sub>). The filtrate was concentrated in vacuo to leave a pale yellow oil which was chromatographed on silica gel (hexane:EtOAc 1:1) to give a diol (23 mg, 94%) as a colorless oil:  $[\alpha]_D^{23} +29.4$  (c 9.6, CHCl<sub>3</sub>); IR (film) 3468, 1772 cm<sup>-1</sup>; <sup>1</sup>H NMR (CDCl<sub>3</sub>) δ 0.08 (3H, s), 0.09 (3H, s), 0.88 (9H, s), 1.17 (3H, s), 1.20 (3H, d, *J* = 6 Hz), 1.28 (1H, ddd, *J* = 13, 13, 13 Hz), 1.42 (3H, s), 1.96 - 2.08 (2H, m), 2.69 (1H, ddd, *J* = 9, 8, 5 Hz), 2.88 (2H, m), 3.42 (2H, d, *J* = 12 Hz), 3.67 (1H, d, *J* = 12 Hz), 3.72 (1H, d, *J* = 12 Hz), 3.78 (1H, dd, *J* = 8, 4 Hz), 4.07 (1H, dq, *J* = 6, 4 Hz), 4.20 (1H, dd, *J* = 7, 4 Hz), 4.28 (1H, dd, *J* = 5, 4 Hz); <sup>13</sup>C NMR (CDCl<sub>3</sub>) δ -4.8, -4.7, 15.6, 18.0, 19.8, 21.9, 22.3, 23.3, 25.8, 30.1, 38.0, 38.9, 48.3, 68.1, 68.6, 69.7, 70.2, 84.3, 101.0, 178.6; MS *m/z* 443 (*M*<sup>+</sup> -15), 129; HRMS *m/z* 443.2466 (calcd for C<sub>22</sub>H<sub>37</sub>O<sub>7</sub>Si 443.2465).

To a solution of the diol obtained above in CH<sub>2</sub>Cl<sub>2</sub> (1.5 mL) containing 2,2-dimethoxypropane (0.28 mL, 2.28 mmol) was added a trace of *p*-toluenesulfonic acid and the solution was stirred at room temperature for 30 min, after which a further quantity of 2,2-dimethoxypropane (0.01 mL, 0.081 mmol) was added. Stirring was continued for 1 h, solid K<sub>2</sub>CO<sub>3</sub> was added and the mixture was concentrated in vacuo. The residue was taken up in a small volume of hexane:EtOAc and was filtered through a short plug of silica gel. The filtrate was concentrated to give an acetonide (24 mg, 98%) as a colorless foam:  $[\alpha]_D^{23} +39.0$  (c 9.7, CHCl<sub>3</sub>); IR (film) 1778 cm<sup>-1</sup>; <sup>1</sup>H NMR (CDCl<sub>3</sub>) δ 0.46 (3H, s), 0.72 (3H, s), 0.76 (3H, s), 0.86 (9H, s), 1.14 (3H, 2), 1.15 (3H, d, *J* = 6 Hz), 1.29 (1H, m), 1.36 (3H, s), 1.48 (3H, s), 1.49 (3H, s), 1.89 (1H, ddd, *J* = 14, 7, 2 Hz), 2.35 (1H, ddd, *J* = 14, 9, 2 Hz), 2.43 (1H, ddd, *J* = 11, 11, 1 Hz), 2.96 (1H, ddd, *J* = 11, 11, 9 Hz),

3.37 (2H, m), 3.69 (1H, d,  $J = 12$  Hz), 3.72 (1H, d,  $J = 12$  Hz), 3.91 (1H, dd,  $J = 11, 6$  Hz), 4.14 (1H, dq,  $J = 6, 2$  Hz), 4.24 (1H, broad s), 4.46 (1H, dd,  $J = 7, 6$  Hz);  $^{13}\text{C}$  NMR ( $\text{CDCl}_3$ )  $\delta$  -4.9, 16.6, 17.9, 19.2, 19.6, 22.3, 23.3, 25.7 (x2), 28.3, 30.0, 36.7, 38.5, 48.4, 69.3, 70.2, 70.3, 74.1, 76.1, 86.0, 98.9, 109.1, 179.2; MS  $m/z$  483 ( $\text{M}^+ - 15$ ), 129; HRMS  $m/z$  483.2777 (calcd for  $\text{C}_{25}\text{H}_{43}\text{O}_7\text{Si}$  483.2778).

To a solution of the acetonide obtained above (20 mg, 0.04 mmol) in THF (1 mL) was added a solution of *tetra-N*-butylammonium fluoride in THF (1M, 0.05 mL, 0.05 mmol) and the mixture was stirred at room temperature for 5 h. Satd. aqueous  $\text{NH}_4\text{Cl}$  was added and the mixture was extracted with EtOAc (3x). The extract was washed with satd. aqueous  $\text{NaHCO}_3$ , dried ( $\text{MgSO}_4$ ) and concentrated in vacuo to leave an oil which was chromatographed on silica gel to give **9** (15 mg, 98%) as a colorless oil:  $[\alpha]_D^{23} +54.9$  (c 8.2,  $\text{CHCl}_3$ ); IR (film) 3470, 1771  $\text{cm}^{-1}$ ;  $^1\text{H}$  NMR ( $\text{CDCl}_3$ )  $\delta$  0.77 (3H, s), 1.13 (3H, d,  $J = 6$  Hz), 1.30 (1H, ddd,  $J = 14, 14, 3$  Hz), 1.36 (3H, s), 1.46 (3H, s), 1.49 (3H, s), 1.91 (1H, ddd,  $J = 14, 7, 3$  Hz), 2.08 (1H, d,  $J = 5$  Hz), 2.33 (1H, ddd,  $J = 14, 9, 3$  Hz), 2.48 (1H, ddd,  $J = 11, 10, 1$  Hz), 3.07 (1H, ddd,  $J = 12, 10, 9$  Hz), 3.37 (2H, m), 3.69 (1H, d,  $J = 12$  Hz), 3.70 (1H, d,  $J = 12$  Hz), 3.94 (1H, dd,  $J = 11, 6$  Hz), 4.12 (1H, m), 4.29 (1H, dd,  $J = 2, 1$  Hz), 4.48 (1H, dd,  $J = 7, 6$  Hz);  $^{13}\text{C}$  NMR ( $\text{CDCl}_3$ )  $\delta$  16.7, 18.4, 19.6, 22.3, 23.3, 25.8, 28.3, 29.9, 37.0, 38.2, 48.1, 68.6, 70.2, 70.3, 74.1, 76.0, 85.9, 98.8, 109.2, 179.3; MS  $m/z$  369 ( $\text{M}^+ - 15$ ), 129; HRMS  $m/z$  369.1911 (calcd for  $\text{C}_{19}\text{H}_{29}\text{O}_7$  369.1913).

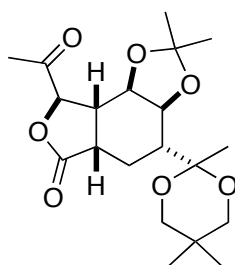

**10**

**Ketone 10.** To a solution of oxalyl chloride (0.045 mL, 0.516 mmol) in  $\text{CH}_2\text{Cl}_2$  (1 mL) at  $-55^\circ\text{C}$  was added DMSO (0.075 mL, 1.057 mmol) followed by a solution of **9** (156 mg, 0.406 mmol) in  $\text{CH}_2\text{Cl}_2$  (0.5 mL). The solution was allowed to warm to  $-25^\circ\text{C}$  during 0.5 h, after which  $\text{Et}_3\text{N}$  (0.3 mL, 2.15 mmol) was added. The solution was allowed to warm to room temperature,  $\text{H}_2\text{O}$  (5 mL) was added and the mixture was extracted with EtOAc (2x). The

extract was washed with 5M HCl and satd. aqueous NaHCO<sub>3</sub>, dried (Na<sub>2</sub>SO<sub>4</sub>), and concentrated in vacuo. The resulting colorless foam was chromatographed on silica gel (EtOAc:hexane 55:45) to give **10** (114 mg, 73%) as a solid which crystallized as colorless plates from ethyl acetate – hexane: mp 135.5-136 °C; [ $\alpha$ ]<sub>D</sub><sup>23</sup> +3.2 (c 7.6, CHCl<sub>3</sub>); IR 1785, 1728 cm<sup>-1</sup>; <sup>1</sup>H NMR (CDCl<sub>3</sub>)  $\delta$  0.77 (3H, s), 1.13 (3H, s), 1.38 (1H, m), 1.38 (3H, s), 1.46 (3H, s), 1.51 (3H, s), 1.85 (1H, ddd, *J* = 14, 7, 3 Hz), 2.28 (3H, s), 2.38 (1H, ddd, *J* = 14, 9, 3 Hz), 2.50 (1H, ddd, *J* = 10, 10, 1 Hz), 2.83 (1H, ddd, *J* = 10, 9, 9 Hz), 3.36 (2H, m), 3.69 (1H, d, *J* = 12 Hz), 3.71 (1H, d, *J* = 12 Hz), 3.96 (1H, dd, *J* = 10, 6 Hz), 4.48 (1H, dd, *J* = 7, 6 Hz), 4.86 (1H, d, *J* = 1 Hz); <sup>13</sup>C NMR (CDCl<sub>3</sub>)  $\delta$  16.7, 19.2, 22.3, 23.3, 25.8, 26.1, 28.3, 30.0, 35.9, 40.3, 47.9, 70.3, 74.0, 75.0, 82.9, 98.7, 109.6, 177.8, 203.9; MS *m/z* 367 (M<sup>+</sup> -15), 129; HRMS *m/z* 367.1756 (calcd for C<sub>19</sub>H<sub>27</sub>O<sub>7</sub> 367.1757). Anal. Calcd for C<sub>20</sub>H<sub>30</sub>O<sub>7</sub>: C, 62.81; H, 7.91. Found: C, 62.64; H, 7.98.

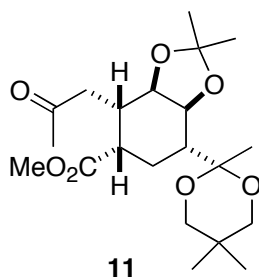

**Keto Ester 11.** To a solution of **10** (440 mg, 1.15 mmol) in THF (7 mL) containing anhydrous FeCl<sub>3</sub> (5 mg) was added a freshly prepared solution of SmI<sub>2</sub> (0.1M, 32 mL, 3.2 mmol). The initially brown solution changed to olive green then to blue-green during 15 min, after which the reaction was quenched with satd. aqueous NH<sub>4</sub>Cl. The resulting two-phase mixture was separated, the aqueous phase was extracted with EtOAc (2x) and the combined organic solution was washed with aqueous sodium thiosulfate (2x), H<sub>2</sub>O, and satd. aqueous NH<sub>4</sub>Cl. The solution was dried (MgSO<sub>4</sub>) and the solvent was removed in vacuo to leave a colorless oil that was taken up into Et<sub>2</sub>O (10 mL). To the solution was added an excess of an ethereal solution of CH<sub>2</sub>N<sub>2</sub>. After 5 min, excess CH<sub>2</sub>N<sub>2</sub> was removed in a stream of N<sub>2</sub> and the solution was passed through a short column of silica gel (EtOAc:hexane). The filtrate was concentrated to leave a solid which was crystallized from hexane to give **11** (356 mg, 78%) as colorless prisms: mp 99-100 °C; [ $\alpha$ ]<sub>D</sub><sup>23</sup> +9.4 (c 0.35, CHCl<sub>3</sub>); IR (KBr) 1719, 1711 cm<sup>-1</sup>; <sup>1</sup>H NMR (CDCl<sub>3</sub>)  $\delta$  0.78 (3H, s); 1.11 (3H, s), 1.32 (3H, s), 1.43 (3H, s), 1.47 (3H, s), 1.59 (1H, ddd, *J* = 13, 12, 12 Hz),

1.98 (1H, ddd,  $J = 13, 9, 4$  Hz), 2.19 (1H, m), 2.15 (3H, s), 2.50 (1H, d,  $J = 6$  Hz), 2.51 (1H, d,  $J = 6$  Hz), 2.75 (1H, dddd,  $J = 6, 6, 6, 6$  Hz), 3.00 (1H, ddd,  $J = 12, 6, 6$  Hz), 3.37 (2H, m), 3.65 (3H, s), 3.67 (1H, d,  $J = 11$  Hz), 3.71 (1H, d,  $J = 11$  Hz), 4.05 (1H, dd,  $J = 6, 6$  Hz), 4.27 (1H, dd,  $J = 9.6$  Hz);  $^{13}\text{C}$  NMR ( $\text{CDCl}_3$ )  $\delta$  17.3, 21.1, 22.4, 23.3, 26.1, 28.2, 30.0, 30.3, 32.9, 39.8, 42.1, 47.3, 51.6, 70.0, 70.1, 73.5, 76.5, 99.3, 108.2, 175.5, 207.0; MS  $m/z$  398 ( $\text{M}^+$ ), 129; HRMS  $m/z$  398.2305 (calcd for  $\text{C}_{21}\text{H}_{34}\text{O}_7$  398.2304). Anal. Calcd for  $\text{C}_{21}\text{H}_{34}\text{O}_7$ : C, 63.29; H, 8.60. Found: C, 63.30; H, 8.80.

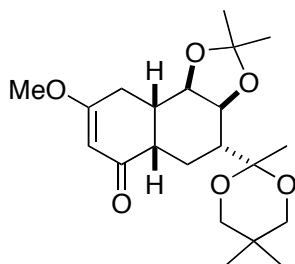

**12**

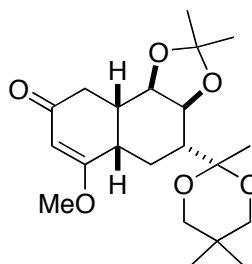

**13**

**Methoxy Enones 12 and 13.** To a solution of **11** (183 mg, 0.46 mmol) in benzene (25 mL) was added a solution of *t*-BuOK in *t*-BuOH (0.26M, 6 mL, 1.54 mmol) and the mixture was stirred at room temperature for 2.5 h. The reaction was quenched with satd. aqueous  $\text{NH}_4\text{Cl}$  and the mixture was extracted with  $\text{Et}_2\text{O}$  (3x). The extract was dried ( $\text{MgSO}_4$ ) and concentrated to leave an oil that was taken up into  $\text{Et}_2\text{O}$  and treated with an excess of ethereal  $\text{CH}_2\text{N}_2$ . After 1 h, excess  $\text{CH}_2\text{N}_2$  was removed in a stream of  $\text{N}_2$ , the solvent was removed in vacuo and the residue was chromatographed on silica gel to give less polar **12** (77 mg, 44%) followed by more polar **13** (84 mg, 48%), both as colorless oils.

**12:**  $[\alpha]_D^{23} +31.6$  (c 0.49,  $\text{CHCl}_3$ ); IR 1653, 1612  $\text{cm}^{-1}$ ;  $^1\text{H}$  NMR ( $\text{CDCl}_3$ )  $\delta$  0.76 (3H, s), 1.05 (3H, s), 1.33 (3H, s), 1.48 (3H, s), 1.49 (3H, s), 1.52 (1H, ddd,  $J = 14, 13, 13$  Hz), 1.99 (1H, ddd,  $J = 13, 9, 4$  Hz), 2.13 (1H, ddd,  $J = 14, 4, 4$  Hz), 2.36 (1H, dd,  $J = 18, 6$  Hz), 2.49 (1H, dd,  $J = 18, 10$  Hz), 2.63 (2H, m), 3.65 (1H, d,  $J = 11$  Hz), 3.69 (1H, d,  $J = 11$  Hz), 3.71 (3H, s), 4.00 (1H, dd,  $J = 5, 4$  Hz), 4.28 (1H, dd,  $J = 9, 5$  Hz), 5.36 (1H, s); MS  $m/z$  380 ( $\text{M}^+$ ), 129; HRMS  $m/z$  365.1962 ( $\text{M}^+ -15$ ) (calcd for  $\text{C}_{20}\text{H}_{29}\text{O}_6$  365.1964).

**13:**  $[\alpha]_D^{23} -108.6$  (c 0.22,  $\text{CHCl}_3$ ); IR (film) 1656, 1606  $\text{cm}^{-1}$ ;  $^1\text{H}$  NMR ( $\text{CDCl}_3$ )  $\delta$  0.76 (3H, s), 1.07 (3H, s), 1.34 (3H, s), 1.49 (3H, s), 1.51 (3H, s), 1.53 (1H, m), 1.96 (1H, ddd,  $J = 13, 9, 4$

Hz), 2.23 (1H, ddd,  $J = 14, 4, 4$  Hz), 2.38 (2H, s), 2.69 (2H, m), 3.33 (2H, m), 3.67 (1H, d,  $J = 11$  Hz), 3.71 (3H, s), 3.75 (1H, d,  $J = 11$  Hz), 3.99 (1H, dd,  $J = 5, 2$  Hz), 4.25 (1H, dd,  $J = 9, 5$  Hz), 5.35 (1H, s);  $^{13}\text{C}$  NMR ( $\text{CDCl}_3$ )  $\delta$  17.5, 22.3, 22.4, 23.4, 26.5, 28.4, 30.0, 34.9, 36.0, 36.3, 48.4, 56.0, 69.8, 70.0, 72.9, 77.3, 99.2, 101.5, 107.6, 181.8, 197.6; MS  $m/z$  380 ( $\text{M}^+$ ), 129; HRMS  $m/z$  380.2198 (calcd for  $\text{C}_{21}\text{H}_{32}\text{O}_6$  380.2199).

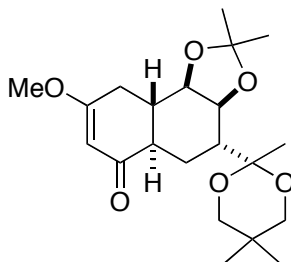

**14**

**Isomerization of 12. Methoxy Enone 14.** To a solution of **12** (170 mg, 0.46 mmol) in MeOH (10 mL) was added a solution of NaOMe (36 mg, 0.66 mmol) in MeOH (1.7 mL) and the mixture was stirred at room temperature for 3 h. The solution was diluted with Et<sub>2</sub>O (20 mL), washed with brine and dried ( $\text{Na}_2\text{SO}_4$ ). The solvent was removed in vacuo and the residual oil was chromatographed on silica gel (hexane:EtOAc 3:1) to give **14** (130 mg, 71%) as a colorless oil:  $[\alpha]_D^{23} +68.6$  (c 1.00  $\text{CHCl}_3$ ); IR (film) 1653, 1611  $\text{cm}^{-1}$ ;  $^1\text{H}$  NMR ( $\text{CDCl}_3$ )  $\delta$  1.25 (3H, s), 1.38 (3H, s), 1.46 (3H, s), 1.48 (3H, s), 1.58 (3H, s), 1.67 (1H, m), 1.87 (1H, m), 2.21 (1H, ddd,  $J = 17, 12, 2$  Hz), 2.29 (2H, m), 2.36 (2H, m), 2.71 (1H, dd,  $J = 17, 5$  Hz), 3.31 (1H, dd,  $J = 11, 2$  Hz), 3.38 (1H, dd,  $J = 12, 2$  Hz), 3.68 (3H, s), 3.61 (1H, d,  $J = 11$  Hz), 3.72 (1H, d,  $J = 12$  Hz), 3.92 (1H, dd,  $J = 9, 6$  Hz), 4.64 (1H, dd,  $J = 5, 2$  Hz), 5.34 (1H, d,  $J = 2$  Hz);  $^{13}\text{C}$  NMR ( $\text{CDCl}_3$ )  $\delta$  14.2, 16.6, 20.5, 22.4, 23.5, 28.6, 29.9, 33.3, 40.6, 42.9, 45.3, 55.7, 70.1, 70.4, 73.5, 79.4, 100.3, 102.0, 107.4, 177.0, 200.0; MS  $m/z$  381 ( $\text{M}^+ + 1$ ), 307; HRMS  $m/z$  381.2277 (calcd for  $\text{C}_{21}\text{H}_{33}\text{O}_6$  381.2277).

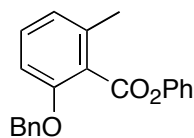

**16**



**Benzoate 16.** A mixture of ethyl 2-hydroxy-6-methylbenzoate (2.88 g, 16.0 mmol), benzyl bromide (2.40 mL, 20.2 mmol), tetra-*n*-butylammonium iodide (60 mg, 0.16 mmol) and sodium hydride (50% dispersion in mineral oil, 850 mg, 17.8 mmol) in THF (40 mL) was stirred at room temperature for 28 h. The mixture was diluted with EtOAc (30 mL), washed with satd. aqueous NH<sub>4</sub>Cl and with satd. aqueous NaHCO<sub>3</sub>, and dried (MgSO<sub>4</sub>). After filtration and removal of the solvent, the residual crude benzyl ether was taken up into a mixture of EtOH (30 mL) and H<sub>2</sub>O (20 mL) containing NaOH (2.0 g, 50 mmol). The mixture was refluxed for 48 h, cooled, acidified to pH 2, and extracted with EtOAc (3x). This solution was extracted with aqueous 1N NaOH (5x) and the combined basic extracts were acidified with concd HCl and extracted with EtOAc (5x). The extract was washed with brine and dried (MgSO<sub>4</sub>), and the solvent was removed in vacuo to leave the crude carboxylic acid as a yellow-orange oil.

To a solution of the crude carboxylic acid obtained above in benzene (40 mL) was added (COCl)<sub>2</sub> (3.5 mL, 40 mmol) and the solution was stirred at room temperature for 24 h. The solvent was removed in vacuo, the residue was taken up into CH<sub>2</sub>Cl<sub>2</sub> (30 mL), and phenol (1.65 g, 17.5 mmol) followed by dry pyridine (15 mL) were added. The solution was stirred at room temperature for 22 h, then was washed with 10% HCl (2x), satd. aqueous CuSO<sub>4</sub> and brine. The solution was dried (MgSO<sub>4</sub>) and concentrated in vacuo to leave a reddish colored oil which was chromatographed on silica gel (hexane:EtOAc 9:1) to give **16** (3.40 g, 67%) as a solid. This material crystallized from hexane as colorless fluffy prisms: mp 81.5-82.5 °C; IR (KBr) 1746, 1587 cm<sup>-1</sup>; <sup>1</sup>H NMR (CDCl<sub>3</sub>) δ 2.46 (3H, s), 5.16 (2H, s), 6.87 (1H, d, *J* = 8 Hz), 6.88 (1H, d, *J* = 8 Hz), 7.11 (1H, dd, *J* = 8, 2 Hz), 7.29 (9H, m), 7.45 (1H, d, *J* = 7 Hz); <sup>13</sup>C NMR (CDCl<sub>3</sub>) δ 19.3, 70.5, 109.9, 121.7, 122.7, 123.5, 125.9, 127.4, 128.0, 128.5, 129.4, 130.7, 136.6, 136.9, 150.8, 155.8, 166.9. Anal. Calcd for C<sub>21</sub>H<sub>18</sub>O<sub>3</sub>: C, 79.22; H, 5.70. Found: C, 78.82; H, 5.63.

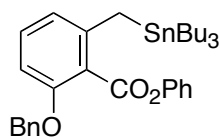

**15**

**Stannane 15.** To a solution of (*i*-Pr)<sub>2</sub>NH (262 μL, 3.00 mmol) in THF (12 mL) at -78 °C was added *n*-BuLi (2.5M in hexanes, 1.12 mL, 2.80 mmol) followed, after 20 min, by a solution of **16** (760 mg, 2.00 mmol) in THF (1 mL) that had been precooled to -78 °C. The solution was stirred

for 20 min at -78 °C and *n*-Bu<sub>3</sub>SnCl (0.71 mL, 2.60 mmol) was added, after which the mixture was allowed to warm to room temperature. The mixture was diluted with Et<sub>2</sub>O (30 mL), stirred vigorously for 4 h, then was washed with H<sub>2</sub>O (2x) and brine. The solution was dried (Na<sub>2</sub>SO<sub>4</sub>) and concentrated to leave an oily residue which was chromatographed on silica gel (hexane:EtOAc 9:1) to give **15** (432 mg, 38%) as a colorless oil: IR (film) 1742, 1591 cm<sup>-1</sup>; <sup>1</sup>H NMR (CDCl<sub>3</sub>) δ 0.89 (15H, m), 1.26 (6H, m), 1.45 (6H, m), 2.45 (2H, m), 5.17 (2H, s), 6.68 (1H, d, *J* = 8 Hz), 6.73 (1H, d, *J* = 8 Hz), 7.12 (2H, m), 7.24 (2H, m), 7.37 (2H, m), 7.47 (2H, m); <sup>13</sup>C NMR (CDCl<sub>3</sub>) δ 10.0, 13.7, 16.8, 27.7, 29.0, 70.5, 107.0, 120.6, 120.9, 121.8, 125.7, 127.5, 127.9, 128.5, 129.4, 130.6, 136.8, 144.1, 151.1, 156.4, 167.2; MS *m/z* 595 (M<sup>+</sup>); HRMS *m/z* 595.2220 (calcd for C<sub>32</sub>H<sub>43</sub>O<sub>3</sub>Sn 595.2234).

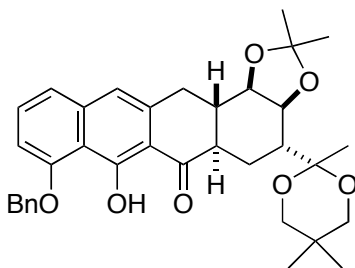

**17**

**Tetracyclic Ketone 17.** To a solution of **15** (94 mg, 0.16 mmol) in THF (0.5 mL) at -78 °C was added *n*-BuLi (1.57M in hexanes, 63 μL, 0.16 mmol). The solution became a deep red color and, after 5 min, a solution of **14** (27 mg, 0.072 mmol) in THF (0.3 mL) precooled to -78 °C was added. After 15 min, the solution was allowed to warm to room temperature and was stirred for 1 h. The mixture was diluted with Et<sub>2</sub>O (10 mL) and the ethereal solution was washed with brine and dried (Na<sub>2</sub>SO<sub>4</sub>). The solvent was removed in vacuo and the residue was chromatographed on silica gel (hexane:EtOAc 9:1 to 1:1) to give **17** (13 mg, 35%, 57% brsm) as a pale yellow, fluorescent oil: [α]<sub>D</sub><sup>23</sup> +12.6 (c 1.00 CHCl<sub>3</sub>); IR (film) 3379, 1733, 1700, 1624, 1617 cm<sup>-1</sup>; <sup>1</sup>H NMR (CDCl<sub>3</sub>) δ 0.77 (3H, s), 0.89 (3H, s), 1.16 (3H, s), 1.42 (3H, s), 1.46 (3H, s), 1.89 (1H, ddd, *J* = 15, 10, 6 Hz), 2.01 (1H, m), 2.36 (1H, m), 2.56 (1H, ddd, *J* = 15, 4, 4 Hz), 2.69 (1H, ddd, *J* = 14, 12, 1 Hz), 2.81 (1H, ddd, *J* = 10, 10, 4 Hz), 3.36 (3H, m), 3.68 (1H, d, *J* = 12 Hz), 3.76 (1H, d, *J* = 11 Hz), 4.01 (1H, dd, *J* = 9, 5 Hz), 4.67 (1H, dd, *J* = 5, 3 Hz), 5.29 (2H, s), 6.85 (1H, d, *J* = 8 Hz), 6.99 (1H, s), 7.22 (1H, dd, *J* = 8, 1 Hz), 7.38 (6H, m), 7.62 (1H, dd, *J* = 8, 1

Hz); MS  $m/z$  572 ( $M^+$ ), 381.307; HRMS  $m/z$  572.2765 (calcd for  $C_{35}H_{40}O_7$  572.2774). There was also obtained 12 mg (44%) of recovered **14**.

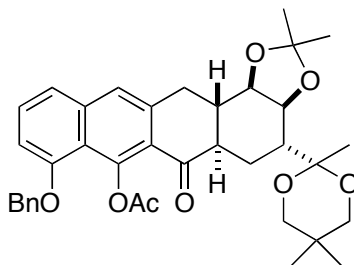

**18**

**Acetoxy Ketone 18.** A solution of **17** (13 mg, 0.024 mol),  $Et_3N$  (0.32 mL, 2.31 mmol), DMAP (10 mg, 0.079 mmol) and  $Ac_2O$  (0.11 mL, 1.16 mmol) in  $CH_2Cl_2$  (2 mL) was stirred at room temperature for 12 h. The solution was diluted with  $Et_2O$  (20 mL) and was washed with satd. aqueous  $CuSO_4$  and brine. The solution was dried ( $Na_2SO_4$ ), the solvent was removed in vacuo and the residual oil was chromatographed on silica gel (hexane:EtOAc 3:1) to give **18** (8 mg, 60%) as a colorless oil:  $[\alpha]^{23}_D +21.0$  (c 0.16  $CHCl_3$ ); IR (film) 1763, 1738, 1670  $cm^{-1}$ ;  $^1H$  NMR ( $CDCl_3$ )  $\delta$  0.79 (3H, s), 1.29 (3H, s), 1.44 (3H, s), 1.48 (3H, s), 1.79 (3H, s), 2.10 (2H, m), 2.32 (2H, m), 2.70 (1H, m), 2.86 (1H, m), 3.36 (1H, m), 3.44 (1H, dd,  $J = 13, 2$  Hz), 3.49 (1H, m), 3.65 (1H, d,  $J = 11$  Hz), 3.76 (1H, dd,  $J = 12, 2$  Hz), 4.05 (1H, m), 4.70 (1H, m), 5.09 (1H, d,  $J = 10$  Hz), 5.17 (1H, d,  $J = 10$  Hz), 6.92 (1H, d,  $J = 8$  Hz), 7.35-7.59 (9H, m);  $^{13}C$  NMR ( $CDCl_3$ )  $\delta$  22.4, 23.4, 26.3, 28.5, 29.7, 29.8, 40.4, 47.0, 53.5, 70.1, 70.3, 70.5, 71.3, 73.2, 73.4, 106.8, 120.0, 128.5, 128.7, 129.1, 136.1, 138.3, 138.4, 183.7, 197.6; MS  $m/z$  614 ( $M^+$ ), 572; HRMS  $m/z$  614.2873 (calcd for  $C_{37}H_{42}O_8$  614.2880).

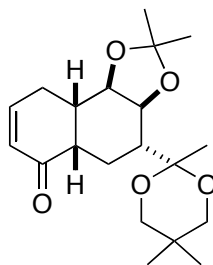

**19**

**Enone 19. A. From 13.** To a stirred suspension of  $LiAlH_4$  (68 mg, 1.79 mmol) in dry  $Et_2O$  (10 mL) was added a solution of **13** (130 mg, 0.342 mmol) in dry  $Et_2O$  (8 mL) and the mixture was

heated at reflux for 2 h. The reaction was quenched with wet Et<sub>2</sub>O and the mixture was acidified to Congo Red with 1M HCl. The separated aqueous layer was extracted with EtOAc (2x) and the combined organic extract was washed with 1M HCl. The separated aqueous layer was extracted with EtOAc (2x) and the combined organic extract was washed with 1M HCl and satd. aqueous NaHCO<sub>3</sub> and dried (MgSO<sub>4</sub>). The solvent was removed in vacuo to leave a solid which was crystallized from hexane to give **19** (84 mg, 70%) as colorless needles: mp 143-144 °C;  $[\alpha]_D^{23} +50.1$  (c 0.10, CHCl<sub>3</sub>); IR (film) 1674 cm<sup>-1</sup>; <sup>1</sup>H NMR (CDCl<sub>3</sub>) δ 0.75 (3H, s) 1.04 (3H, s), 1.34 (3H, s), 1.48 (3H, s), 1.49 (3H, s), 1.58 (1H, ddd, *J* = 13, 12, 12 Hz), 2.01 (2H, m), 2.36 (2H, m), 2.70 (2H, m), 3.32 (2H, m), 3.65 (1H, d, *J* = 12 Hz), 3.70 (1H, d, *J* = 12 Hz), 4.03 (1H, dd, *J* = 5, 3 Hz), 4.28 (1H, dd, *J* = 9, 5 Hz), 6.03 (1H, ddd, *J* = 10, 2, 2 Hz), 6.90 (1H, ddd, *J* = 10, 4, 4 Hz); <sup>13</sup>C NMR (CDCl<sub>3</sub>) δ 17.5, 20.8, 22.4, 23.4, 25.8, 26.4, 28.3, 29.9, 35.4, 43.1, 47.8, 69.9, 70.1, 73.1, 76.8, 99.4, 107.8, 129.3, 147.6, 201.6; MS *m/z* 335 (*M*<sup>+</sup> -15), 149.129; HRMS *m/z* 335.1860 (calcd for C<sub>19</sub>H<sub>27</sub>O<sub>5</sub> 335.1858). Anal. Calcd for C<sub>20</sub>H<sub>30</sub>O<sub>5</sub>: C, 68.54; H, 8.63. Found: C, 68.14; H, 8.74.

**B. From 12.** A suspension containing **12** (104 mg, 0.274 mmol) and Pd/C (8 mg) in MeOH (5 mL) was stirred at room temperature under H<sub>2</sub> (1 atm) for 12 h. The suspension was filtered and the filtrate was concentrated to leave a mixture of saturated alcohol **21** and the saturated ketone (93 mg, ca 2:1 respectively, each as a mixture of diastereomers) as a pale yellow oil. The oil was taken up into CH<sub>2</sub>Cl<sub>2</sub> (10 mL), Dess Martin periodinane (147 mg, 0.36 mmol) was added, and the solution was stirred at room temperature for 2 h. The mixture was poured into ice-cold satd. aqueous NaHCO<sub>3</sub> and was extracted with EtOAc (2x). The extract was dried (Na<sub>2</sub>SO<sub>4</sub>) and the solvent was removed in vacuo to leave crude **22** (74 mg, mixture of two diastereomers) as a colorless oil. The oil was taken up into THF (6 mL) and *t*-BuOK (56 mg, 0.50 mmol, sublimed) was added to the solution. The mixture was stirred at room temperature for 1.5 h then was poured into water and extracted with EtOAc (2x). The extract was washed with 1M HCl and brine, and was dried (Na<sub>2</sub>SO<sub>4</sub>). The solvent was removed in vacuo to leave a pale yellow solid which was crystallized from hexane to give **19** (51 mg, 53%) as colorless needles, identical with material prepared from **13** above.

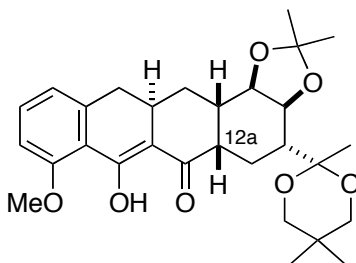

**24**

**Diketone 24.** To a freshly prepared solution of LDA (0.285 mmol) in THF (1.6 mL) at -78 °C was added a solution of **23** (69 mg, 0.285 mmol) in THF (0.8 mL). The resulting deep red solution was stirred for 15 min, after which a solution of **19** (30 mg, 0.086 mmol) and LiBr (76 mg, 0.868 mmol) in THF (1.6 mL) was added. The mixture was stirred at -78 °C for 2 h, during which the color changed from red to pale yellow. The mixture was allowed to warm to room temperature and the reaction was quenched with satd. aqueous NH<sub>4</sub>Cl. The mixture was extracted with Et<sub>2</sub>O (3x), and the extract was washed with H<sub>2</sub>O and brine and was dried (MgSO<sub>4</sub>). The solvent was removed in vacuo and the residual oil was chromatographed on silica gel (hexane:EtOAc 3:1) to give **24** (44 mg, 99%, keto-enol mixture) as a colorless oil: IR (film) 1595 cm<sup>-1</sup>; <sup>1</sup>H NMR (CDCl<sub>3</sub>) δ 0.77 (3H, s), 1.13 (3H, s), 1.33 (3H, s), 1.40 (1H, m), 1.47 (6H, s), 2.05 (3H, m), 2.22 (1H, ddd, *J* = 13, 4, 4 Hz), 2.46 (1H, m), 2.54 (1H, dd, *J* = 14, 4 Hz), 2.81 (3H, m), 3.37 (2H, m), 3.68 (1H, d, *J* = 12 Hz), 3.70 (1H, d, *J* = 12 Hz), 3.90 (3H, s), 3.92 (3H, s), 3.92 (1H, m), 4.41 (1H, dd, *J* = 8, 8 Hz), 6.76 (1H, d, *J* = 11 Hz), 6.83 (1H, m), 7.34 (1H, m), 16.42 (1H, s); <sup>13</sup>C NMR (CDCl<sub>3</sub>) δ 14.1, 16.9, 22.3, 22.7, 22.8, 23.2, 25.7, 28.4, 28.7, 30.0, 31.6, 33.0, 35.3, 37.1, 37.5, 46.8, 56.0, 70.2, 70.3, 74.4, 77.2, 99.2, 108.6, 109.0, 110.4, 120.0, 121.1, 121.7, 121.9, 126.0, 129.5, 131.0, 133.6, 140.1, 144.7, 150.9, 156.8, 159.8, 183.1, 188.3; MS *m/z* 498 (M<sup>+</sup>); HRMS *m/z* 498.2617 (calcd for C<sub>29</sub>H<sub>38</sub>O<sub>7</sub> 498.2617).

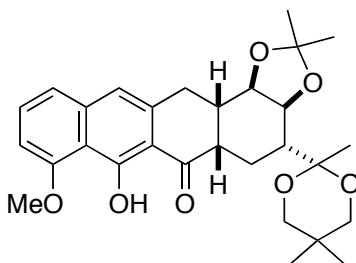

**26**

**Naphthacenone 26.** A solution of **24** (110 mg, 0.214 mmol) and **25** (526 mg, 2.14 mmol) in toluene (21 mL) was heated at reflux for 24 h. The solvent was removed in vacuo to leave a yellow oil which tlc showed to be a mixture of highly fluorescent **26** (less polar), unreacted **24** (weakly fluorescent, more polar) and **25**. Chromatography of the residual oil on silica gel (toluene:EtOAc 9:1) gave **26** (42 mg, 38%, 71% brsm) as an amorphous solid:  $[\alpha]_D^{23} +2.7$  (c 0.1, CHCl<sub>3</sub>); IR (KBr) 2952 (br), 1623, 1576 cm<sup>-1</sup>; <sup>1</sup>H NMR (CDCl<sub>3</sub>)  $\delta$  0.73 (3H, s), 1.00 (3H, s), 1.36 (3H, s), 1.51 (3H, s), 1.52 (3H, s), 1.74 (1H, ddd,  $J = 14, 13, 13$  Hz), 2.09 (1H, m), 2.27 (1H, ddd,  $J = 14, 5, 5$  Hz), 2.78 (1H, m), 2.92 (1H, dd,  $J = 16, 5$  Hz), 3.01 (1H, ddd,  $J = 12, 5, 5$  Hz), 3.09 (1H, dd,  $J = 16, 12$  Hz), 3.30 (2H, m), 3.65 (1H, d,  $J = 12$  Hz), 3.70 (1H, d,  $J = 12$  Hz), 4.02 (3H, s), 4.08 (1H, dd,  $J = 5, 5$  Hz), 4.34 (1H, dd,  $J = 9, 5$  Hz), 6.81 (1H, d,  $J = 8$  Hz), 6.99 (1H, s), 7.21 (1H, d,  $J = 8$  Hz), 7.49 (1H, dd,  $J = 8, 8$  Hz); <sup>13</sup>C NMR (CDCl<sub>3</sub>)  $\delta$  17.4, 21.7, 22.3, 23.4, 26.4, 28.4, 28.9, 29.9, 35.1, 43.5, 48.2, 56.1, 69.8, 70.1, 73.1, 77.2, 99.3, 105.5, 107.8, 110.8, 115.2, 116.8, 119.7, 131.1, 136.5, 140.3, 159.8, 166.3, 206.3; MS  $m/z$  496 (M<sup>+</sup>), 129; HRMS  $m/z$  496.2459 (calcd for C<sub>29</sub>H<sub>36</sub>O<sub>7</sub> 496.2461).

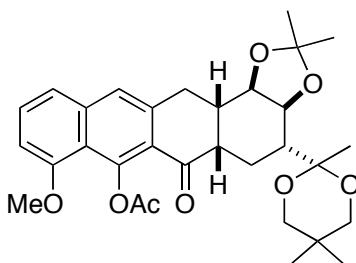

**27**

**Acetate 27.** A solution of **26** (14.0 mg, 0.028 mol), DMAP (12 mg, 0.01 mmol), Et<sub>3</sub>N (0.5 mL, 1.4 mmol) and Ac<sub>2</sub>O (0.14 mL, 1.4 mmol) in CH<sub>2</sub>Cl<sub>2</sub> (2 mL) was stirred at room temperature for 80 min. The reaction was quenched with satd. aqueous NaHCO<sub>3</sub> and the mixture was extracted with EtOAc. The extract was washed with brine and dried (Na<sub>2</sub>SO<sub>4</sub>), and the solvent was removed in vacuo to leave a colorless oil. This material was chromatographed on silica gel (hexane:EtOAc 2:1) to give **27** (10.0 mg, 70%) as a colorless, non-fluorescent oil:  $[\alpha]_D^{20} +55.0$  (c 0.40 CHCl<sub>3</sub>); IR (film) 1767, 1681, 1622 cm<sup>-1</sup>; <sup>1</sup>H NMR (CDCl<sub>3</sub>)  $\delta$  0.74 (3H, s), 1.03 (3H, s), 1.32 (3H, s), 1.47 (3H, s), 1.50 (3H, s), 2.06 (1H, ddd,  $J = 12, 8, 4$  Hz), 3.17 (1H, dd,  $J = 16, 8$  Hz), 3.32 (2H, dd,  $J = 8, 8$  Hz), 3.65 (2H, m), 3.88 (1H, m), 3.93 (3H, s), 4.35 (1H, t,  $J = 1$  Hz), 6.79 (1H, d,  $J = 7$  Hz), 7.33 (1H, d,  $J = 8$  Hz), 7.44 (1H, dd,  $J = 8, 8$  Hz), 7.56 (1H, s); <sup>13</sup>C NMR

(CDCl<sub>3</sub>)  $\delta$  21.4, 22.4, 22.8, 23.8, 26.5, 28.8, 29.7, 30.1, 30.3, 34.8, 46.3, 48.0, 56.6, 70.4, 70.5, 74.0, 74.5, 76.1, 77.6, 99.7, 106.4, 108.6, 119.1, 120.4, 122.2, 125.8, 129.7, 138.9, 157.9, 170.4, 199.1; HRMS  $m/z$  538.2560 ( $M^+$ ) (calcd for C<sub>31</sub>H<sub>38</sub>O<sub>8</sub> 538.2567).

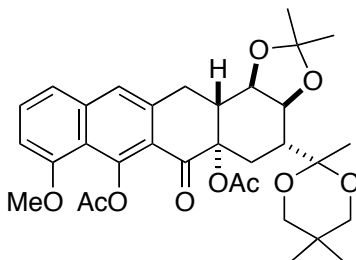

**29**

**Diacetate 29.** A solution of **27** (11.4 mg, 0.021 mmol), Et<sub>3</sub>N (0.07 mL, 0.53 mmol) and trimethylsilyl triflate (0.04 mL, 0.22 mmol) in CH<sub>2</sub>Cl<sub>2</sub> (3 mL) was stirred at 0 °C for 1h. The reaction was quenched with satd. aqueous NaHCO<sub>3</sub> and the separated aqueous layer was extracted with EtOAc. The combined organic extracts were washed with brine and dried (Na<sub>2</sub>SO<sub>4</sub>). Removal of the solvent in vacuo gave crude enol ether which was taken up into CH<sub>2</sub>Cl<sub>2</sub> (3 mL). The solution was cooled to -50 °C, *m*-chloroperbenzoic acid (40 mg, 0.23 mmol) was added and the mixture was stirred for 20 min, after which it was allowed to warm to -20 °C. The reaction was quenched at this temperature with an ice-cold satd. aqueous solution of Na<sub>2</sub>SO<sub>3</sub> and the separated aqueous layer was extracted with CH<sub>2</sub>Cl<sub>2</sub>. The combined organic extracts were washed with brine and dried (Na<sub>2</sub>SO<sub>4</sub>). Removal of the solvent in vacuo left pure  $\alpha$ -hydroxy ketone **28** (9 mg, 80%) as a colorless oil. To a solution of **28** obtained above in pyridine (0.5 mL) containing DMAP (9 mg, 0.07 mol) was added Ac<sub>2</sub>O (0.15 mL, 1.59 mmol) and the mixture was stirred at room temperature for 2.5 h. The solution was diluted with EtOAc, washed with satd. aqueous NH<sub>4</sub>Cl and brine, and dried (Na<sub>2</sub>SO<sub>4</sub>). The solvent was removed in vacuo to leave an oil which was chromatographed on silica gel (hexane:EtOAc 3:2) to give **29** (9.0 mg, 72% from **27**) as a colorless oil:  $[\alpha]_D^{20} +104.0$  (c 0.35 CHCl<sub>3</sub>); <sup>1</sup>H NMR (CDCl<sub>3</sub>)  $\delta$  0.81 (3H, s), 1.14 (3H, s), 1.38 (3H, s), 1.43 (3H, s), 1.53 (3H, s), 1.75 (3H, s), 2.02 (1H, ddd,  $J$  = 14, 8, 4 Hz), 2.25 (1H, m), 2.37 (1H, d,  $J$  = 9 Hz), 2.45 (3H, s), 3.25 (2H, d,  $J$  = 9 Hz), 3.48 (3H, m), 3.72 (2H, m), 3.90 (3H, s), 4.29 (1H, dd,  $J$  = 11, 6 Hz), 4.62 (1H, dd,  $J$  = 8, 7 Hz), 6.76 (1H, d,  $J$  = 8 Hz), 7.31 (1H, d,  $J$  = 8 Hz), 7.42 (1H, dd,  $J$  = 8, 8 Hz), 7.49 (1H, s); <sup>13</sup>C NMR (CDCl<sub>3</sub>)  $\delta$  17.6, 20.8, 21.4, 22.8, 23.7, 25.7, 25.9, 27.4, 28.5, 30.1, 30.4, 41.9, 45.4, 56.4, 70.6, 75.1, 75.7,

77.6, 82.2, 99.6, 106.0, 109.4, 118.9, 120.3, 123.0, 125.1, 129.3, 137.9, 138.3, 157.3, 170.0, 171.0, 192.4; HRMS (FAB)  $m/z$  597.2704 ( $M^+ + 1$ ) (calcd for  $C_{33}H_{41}O_{10}$  597.2700).

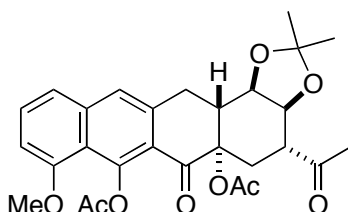

**Diketone.** A solution of **29** (8.0 mg, 0.013 mol) and *p*-TsOH (2.6 mg, 0.013 mmol) in acetone (2 mL) was stirred at room temperature for 4 h. The mixture was diluted with EtOAc and the solution was washed with satd. aqueous  $NaHCO_3$  and brine. The solution was dried ( $Na_2SO_4$ ), the solvent was removed in vacuo and the residual oil was chromatographed on silica gel (hexane:EtOAc 3:2) to give diketone (5.1 mg, 73%) as a colorless oil:  $[\alpha]^{23}_D +100.0$  (c 0.35,  $CHCl_3$ ); IR (film) 1746, 1706, 1625, 1568  $cm^{-1}$ ;  $^1H$  NMR ( $CDCl_3$ )  $\delta$  1.42 (3H, s), 1.48 (3H, s), 1.76 (1H, dd,  $J = 15, 11$  Hz), 1.80 (3H, s), 2.24 (1H, m), 2.34 (3H, s), 2.48 (3H, s), 2.92 (1H, ddd,  $J = 12, 7, 4$  Hz), 3.28 (2H, m), 3.38 (1H, dd,  $J = 17, 6$  Hz), 3.95 (3H, s), 4.36 (1H, dd,  $J = 10, 6$  Hz), 4.61 (1H, t,  $J = 7$  Hz), 6.81 (1H, d,  $J = 8$  Hz), 7.36 (1H, d,  $J = 8$  Hz), 7.47 (1H, dd,  $J = 8, 8$  Hz), 7.53 (1H, s);  $^{13}C$  NMR ( $CDCl_3$ )  $\delta$  20.7, 21.2, 25.6, 27.5, 28.0, 28.6, 30.1, 30.3, 43.0, 48.9, 56.4, 74.6, 76.0, 77.6, 81.3, 106.2, 109.7, 120.3, 125.1, 129.6, 138.5, 170.9, 199.0, 209.1; HRMS (FAB)  $m/z$  511.1959 ( $M^+ + 1$ ) (calcd for  $C_{28}H_{31}O_9$  511.1968).

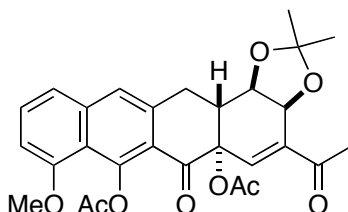

### 30

**Enone 30.** To a solution of diketone obtained above (6.0 mg, 0.011 mmol) in  $CH_2Cl_2$  (2 mL) at 0 °C were added NaHMDS (0.046 mL, 0.24 mmol) followed by  $Me_3SiH$  (0.008 mL, 0.18 mmol). The mixture was stirred for 4 h at 0 °C and the reaction was quenched with satd. aqueous  $NaHCO_3$ . The mixture was extracted with EtOAc and the extract was washed with brine and dried ( $Na_2SO_4$ ). The solvent was removed in vacuo to leave crude silyl enol ether, which was



taken up into CH<sub>2</sub>Cl<sub>2</sub> (1.5 mL). To this solution at 0 °C was added solid K<sub>2</sub>CO<sub>3</sub> (5 mg) followed by PhSeCl (5.9 mg, 0.030 mmol) and the mixture was stirred for 30 min. The solution was diluted with EtOAc and satd. aqueous NaHCO<sub>3</sub>, the organic layer was separated and the aqueous layer was extracted with EtOAc (2x). The combined extracts were washed with brine and dried (MgSO<sub>4</sub>). The solvent was removed in vacuo to leave an oil which was chromatographed on silica gel (hexane:EtOAc 2:1) to give  $\alpha$ -selenyl ketone (4 mg) as an oil.

The ketone obtained above was taken up into CH<sub>2</sub>Cl<sub>2</sub> (1 mL), the solution was cooled to -78 °C and *m*-chloroperbenzoic acid (0.2M in CH<sub>2</sub>Cl<sub>2</sub>, 0.04 mL, 0.005 mmol) was added. The solution was stirred at -78 °C for 30 min, (*i*-Pr)<sub>2</sub>NH (0.02mL) was added and the mixture was allowed to warm to room temperature. The solution was diluted with EtOAc, dried (Na<sub>2</sub>SO<sub>4</sub>) and concentrated in vacuo to leave an oil which was chromatographed on silica gel (hexane:EtOAc 3:2) to give **30** (2.0 mg, 40% over three steps) as a colorless oil:  $[\alpha]_D^{20} +48.0$  (c 0.25, CHCl<sub>3</sub>); IR (film) 1760, 1742, 1690, 1626 cm<sup>-1</sup>; <sup>1</sup>H NMR (CDCl<sub>3</sub>)  $\delta$  1.46 (3H, s), 1.52 (3H, s), 1.86 (3H, s), 2.40 (1H, m), 2.50 (3H, s), 2.56 (3H, s), 3.30 (1H, dd, *J* = 17, 11 Hz), 3.51 (1H, dd, *J* = 17, 7 Hz), 3.96 (3H, s), 4.30 (1H, dd, *J* = 10, 6 Hz), 5.09 (1H, d, *J* = 6 Hz), 6.84 (1H, d, *J* = 8 Hz), 7.38 (1H, d, *J* = 8 Hz), 7.50 (1H, dd, *J* = 8, 8 Hz), 7.58 (1H, s), 7.78 (1H, s); HRMS *m/z* 508.1725 (M<sup>+</sup>) (calcd for C<sub>28</sub>H<sub>28</sub>O<sub>9</sub> 508.1733).

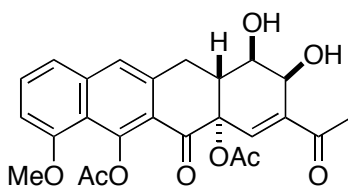

**31**

**Diol 31.** A solution of **30** (4.4 mg, 0.008 mmol) and trifluoroacetic acid (0.7 m) in CH<sub>2</sub>Cl<sub>2</sub> (1 mL) was stirred at room temperature for 1 h. The solvent was removed in vacuo and the residue was chromatographed on silica gel (EtOAc:hexane 2:1 to 3:1) to give **31** (2.2 mg, 55%) as a colorless oil:  $[\alpha]_D^{20} +76.4$  (c 0.11, CHCl<sub>3</sub>); IR (film) 3424, 1765, 1751, 1676, 1650, 1624 cm<sup>-1</sup>; <sup>1</sup>H NMR (CDCl<sub>3</sub>)  $\delta$  1.85 (3H, s), 2.49 (3H, s), 2.55 (3H, s), 2.62 (1H, m), 3.37 (1H, dd, *J* = 16, 11 Hz), 3.50 (1H, dd, *J* = 18, 6 Hz), 3.96 (3H, s), 4.07 (1H, m), 4.72 (1H, d, *J* = 4 Hz), 6.83 (1H,

d,  $J = 8$  Hz), 7.39 (1H, d,  $J = 8$  Hz), 7.50 (1H, t,  $J = 8$  Hz), 7.61 (1H, s), 7.66 (1H, s); HRMS (ES)  $m/z$  491.1339 ( $M^+ + 23$ ) (calcd for  $C_{25}H_{24}O_9Na$  491.1318).

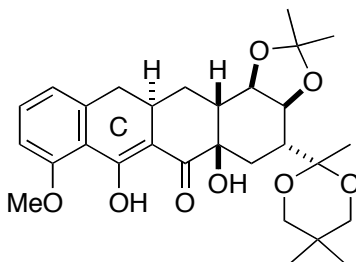

**32**

**Hydroxy Ketone 32.** To a solution of **24** (15 mg, 0.034 mmol) in dioxane (1 mL) was added  $SeO_2$  (19 mg, 0.17 mmol) and the mixture was heated at reflux for 1.5 h. The resulting red solution was allowed to cool to room temperature, the solvent was removed and the residual oil was chromatographed on silica gel (hexane:EtOAc 2:1) to yield **32** (6 mg, 40%) as a colorless oil:  $[\alpha]_D^{20} +16.7$  (c 0.15,  $CHCl_3$ ); IR (film) 3444, 2935, 1617, 1596  $cm^{-1}$ ;  $^1H$  NMR ( $CDCl_3$ )  $\delta$  0.82 (3H, s), 1.14 (3H, s), 1.36 (3H, s), 1.51 (6H, s), 1.56 (1H, m), 1.70 (1H, dt,  $J = 13, 4$  Hz), 2.28 (1H, dd,  $J = 15, 2$  Hz), 2.38 (1H, ddd,  $J = 13, 8, 2$  Hz), 2.46 (1H, s), 2.61 (1H, dd,  $J = 14, 14$  Hz), 2.84 (2H, m), 3.43 (2H, dd,  $J = 17, 12$  Hz), 3.70 (2H, dd,  $J = 12, 9$  Hz), 3.84 (1H, dd,  $J = 12, 6$  Hz), 3.93 (3H, s), 4.45 (1H, dd,  $J = 7, 7$  Hz), 6.81 (1H, d,  $J = 7$  Hz), 6.90 (1H, d,  $J = 8$  Hz), 7.41 (1H, dd,  $J = 8, 7$  Hz), 16.10 (1H, s);  $^{13}C$  NMR ( $CDCl_3$ )  $\delta$  17.4, 22.8, 23.5, 26.3, 26.6, 28.8, 29.3, 30.1, 30.4, 33.2, 37.4, 41.3, 44.1, 56.5, 70.6, 71.3, 73.9, 75.2, 77.6, 99.5, 108.4, 109.8, 110.9, 120.5, 134.5, 145.3, 160.2, 179.6, 190.2; HRMS (FAB)  $m/z$  515.2659 ( $M^+ + 1$ ) (calcd for  $C_{29}H_{39}O_8$  515.2645).

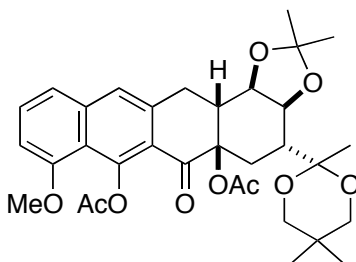

**34**

**Diacetate 34.** A solution of **32** (3.0 mg, 0.006 mmol),  $Ac_2O$  (29 mg, 0.28 mmol), pyridine (0.2 mL) and DMAP (2 mL) was stirred at room temperature for 15 h. The reaction was quenched

with satd. aqueous NaHCO<sub>3</sub> and the mixture was extracted with Et<sub>2</sub>O. The extract was washed with satd. aqueous CaSO<sub>4</sub> and brine and was dried (Na<sub>2</sub>SO<sub>4</sub>). The solvent was removed in vacuo and the residue was chromatographed on silica gel (hexane:EtOAc 1:1) to give **33** (1.8 mg) admixed with a small quantity of a monoacetate. The mixture was taken up in toluene (0.5 mL), **25** (5 mg, 0.02 mmol) was added and the solution was heated at 105 °C for 15 h. The solvent was removed in vacuo and the residue was chromatographed on silica gel (pentane:EtOAc 4:1) to give **34** (1.9 mg, 55%) as a colorless oil:  $[\alpha]_D^{20} +38.2$  (c 0.14, CHCl<sub>3</sub>); <sup>1</sup>H NMR (CDCl<sub>3</sub>) δ 0.80 (3H, s), 1.29 (3H, s), 1.42 (3H, s), 1.47 (3H, s), 1.51 (3H, s), 1.84 (3H, s), 2.40 (2H, d, *J* = 7 Hz), 2.50 (3H, s), 2.58 (3H, s), 3.39 (1H, m), 3.52 (2H, m), 3.97 (3H, s), 4.41 (1H, dd, *J* = 12, 8 Hz), 5.10 (1H, dd, *J* = 8, 8 Hz), 6.81 (1H, d, *J* = 6 Hz), 7.36 (1H, dd, *J* = 8, 8 Hz), 7.44 (1H, s), 7.58 (1H, d, *J* = 8 Hz); <sup>13</sup>C NMR (CDCl<sub>3</sub>) δ 17.1, 21.5, 21.9, 22.9, 23.5, 26.1, 27.3, 28.6, 29.2, 30.1, 42.4, 44.9, 56.6, 71.0, 75.5, 76.1, 77.2, 84.2, 100.3, 106.4, 109.3, 119.9, 121.8, 123.7, 124.8, 130.2, 138.8, 139.2, 156.6, 171.5, 171.7, 196.0; HRMS (FAB) *m/z* 597.2712 (M<sup>+</sup> +1) (calcd for C<sub>33</sub>H<sub>41</sub>O<sub>10</sub> 597.2700).

SBHIV1R.101  
DATE 10-6-88

SF 400.134  
SY 74.8900000  
O1 8400.000  
SI 16384  
TD 16384  
SW 6024.096  
HZ/PT .735

PW 3.0  
RD 2.000  
RG 1.360  
NS 32  
TE 297

FW 7600  
O2 6000.000  
DP 15H P0

LB 0.0  
GB 0.0  
CX 33.00  
CT 18.00  
F1 7.500P  
F2 -1.200P  
HZ/CM 93.569  
PPM/CM .233  
SR 4393.19

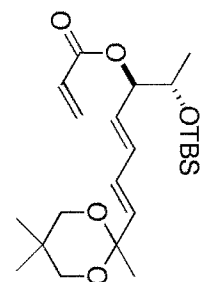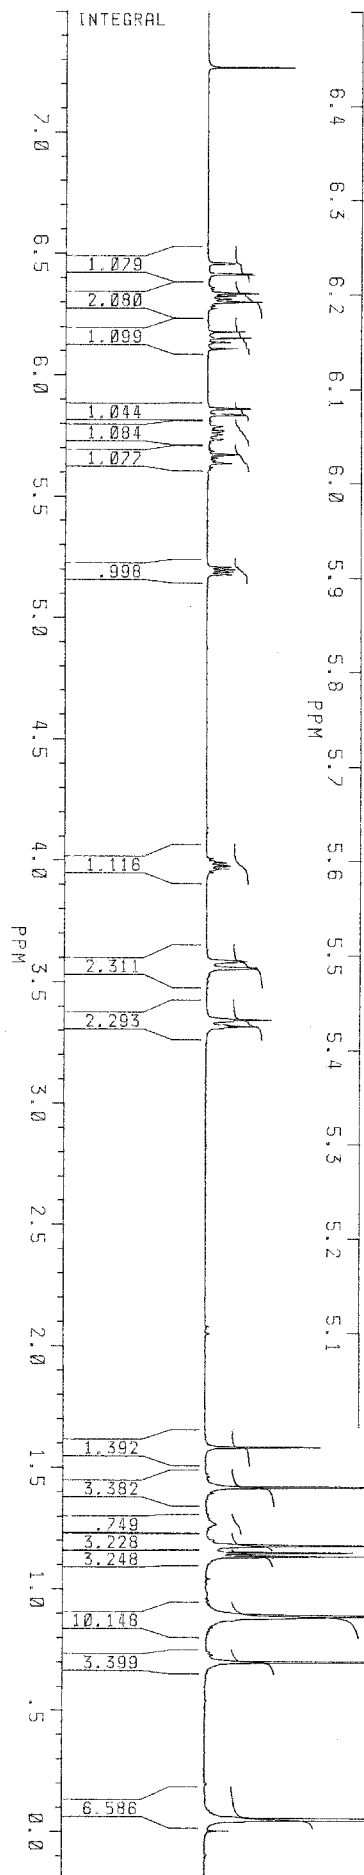

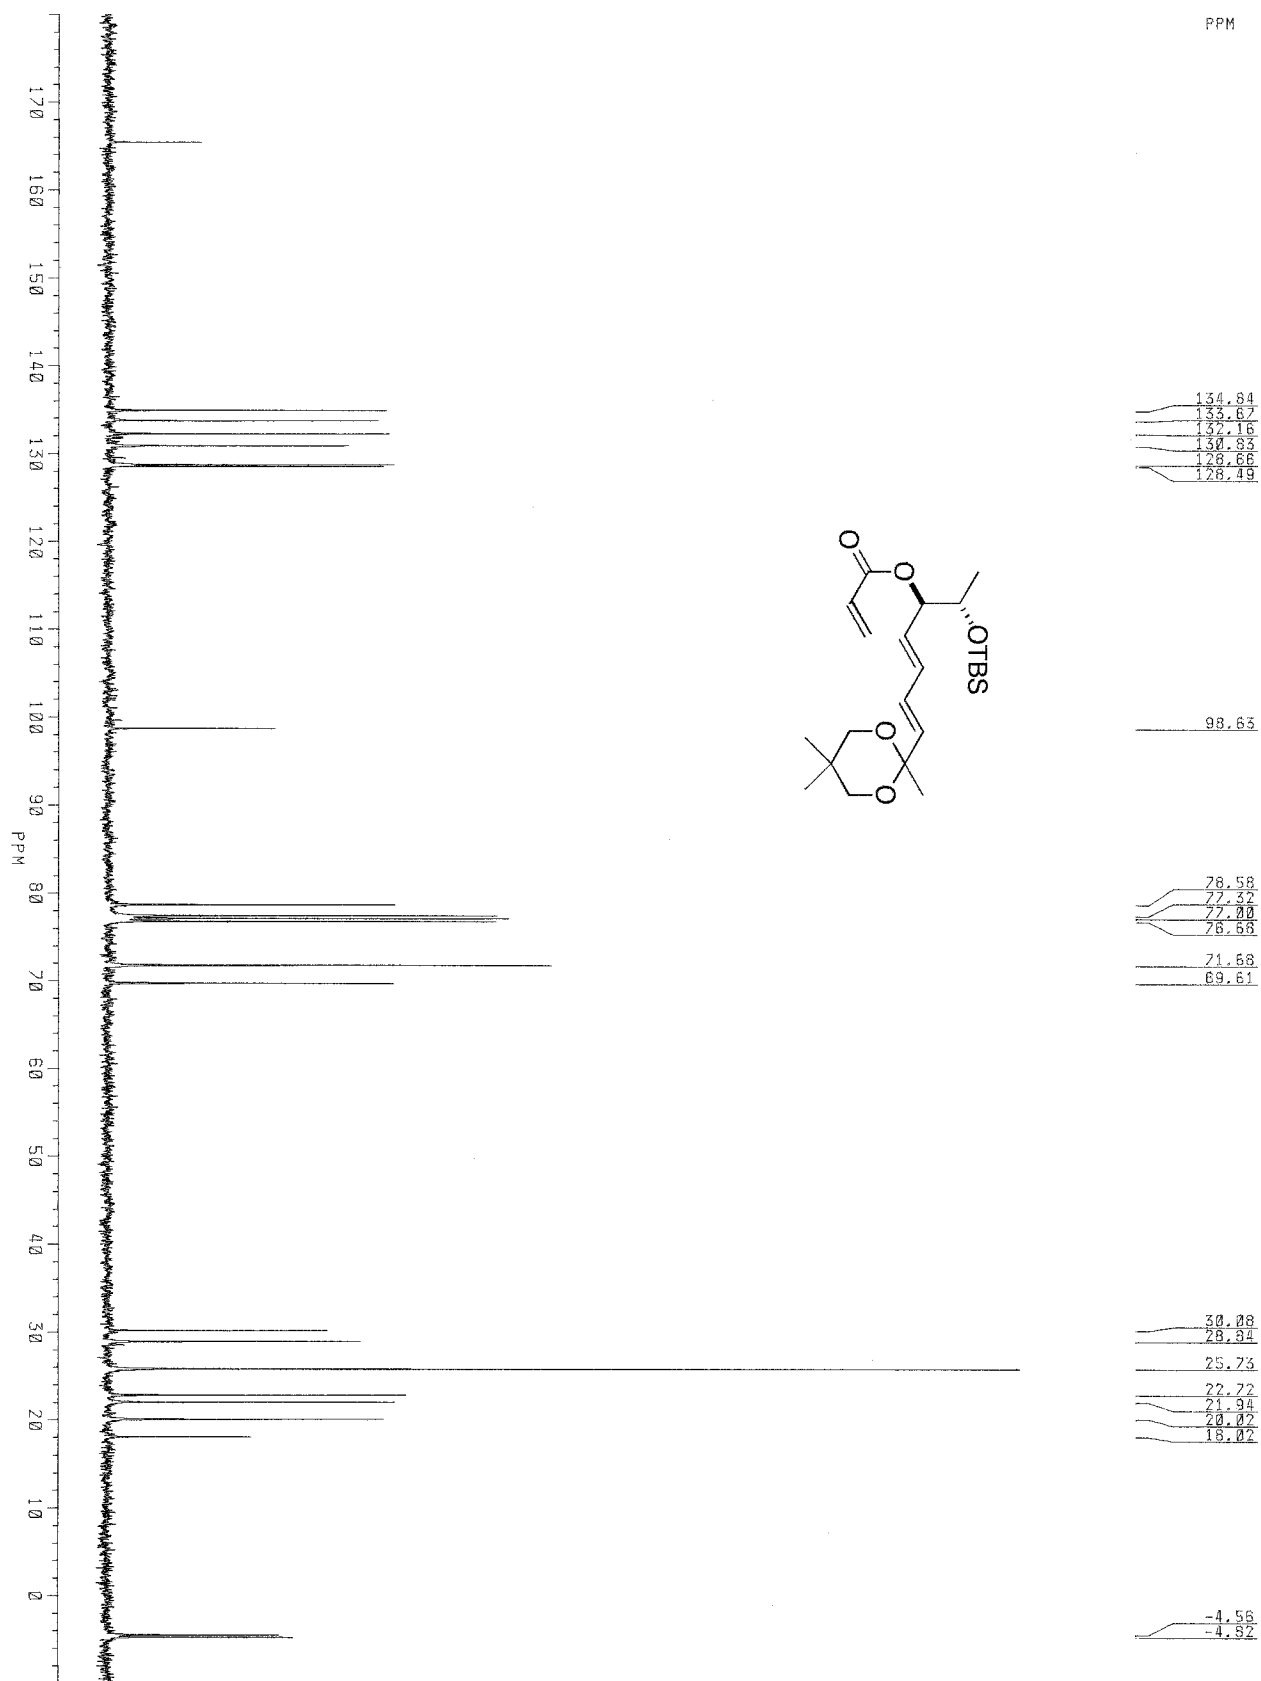

JD170.201  
 DATE 22-6-88  
 SF 100.614  
 SI 74.8900000  
 OI 54000.000  
 SI 65536  
 TD 65536  
 SW 25000.000  
 HZ/PT .763  
 PW 3.0  
 RD 0.0  
 RG 1.311  
 NS 400  
 TE 1335  
 297  
 FW 31300  
 OZ 6000.000  
 DP 15H BB  
 LB 3.000  
 GB 0.0  
 CX 33.00  
 CY 16.00  
 F1 178.988P  
 F2 -9.998P  
 HZ/CM 529.229  
 PPM/CM 5.757  
 SR 43873.89

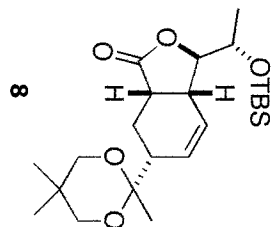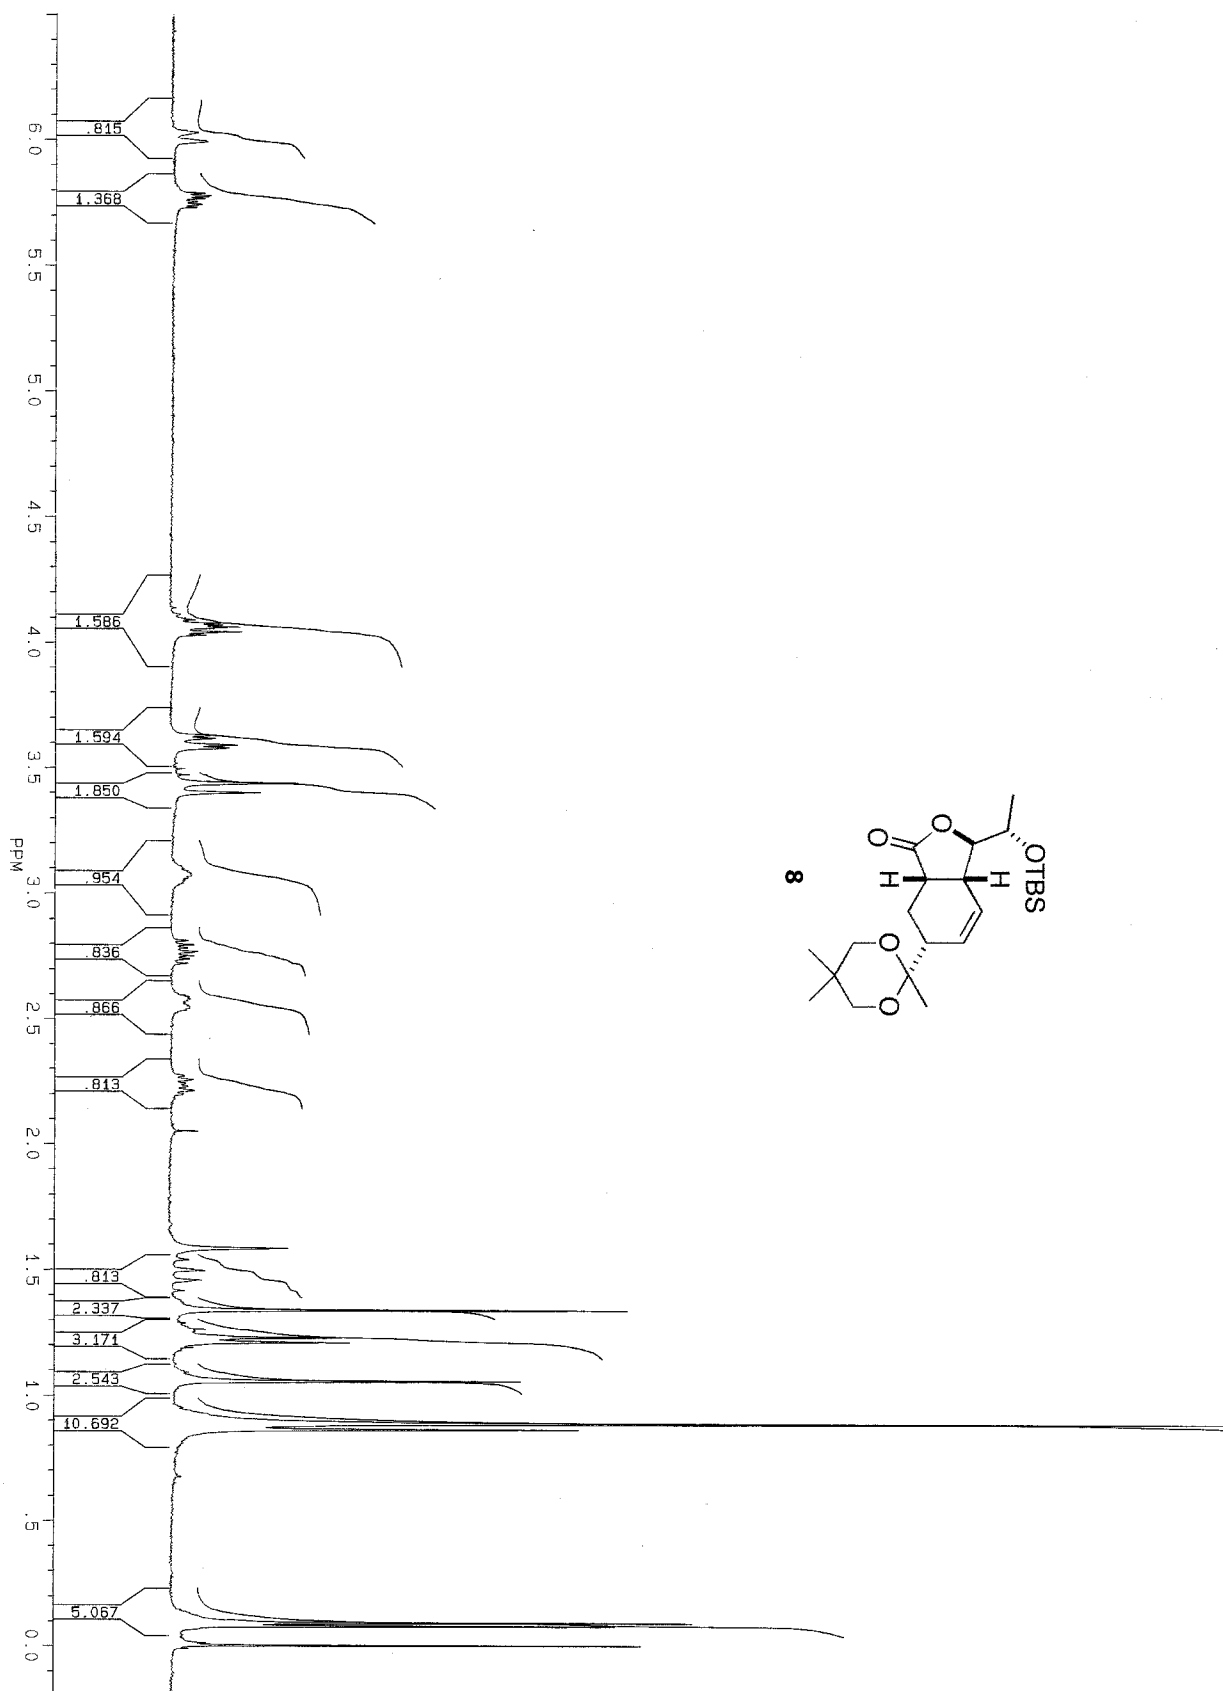

SPC2  
 DATE 31-12-86  
 SF 300.133  
 SY 210.0  
 O1 8200.000  
 SI 16384  
 TD 16384  
 SW 4504.505  
 HZ/PT 550  
 PW 3.0  
 PD 2.000  
 AQ 1.819  
 RG 40  
 NS 32  
 TE 297  
 FM 5700  
 D2 3200.000  
 DP 63L P0  
 LB 0.0  
 GB 0.0  
 CX 35.00  
 CY 35.00  
 F1 6.500P  
 F2 1.98P  
 HZ/CM 57.437  
 DM/CM 191  
 SR 9366.20

PPM

178.519

129.803

126.490

99.604

87.192

27.317

26.999

26.682

26.354

26.069

25.970

42.173

39.650

35.118

29.956

25.722

23.558

23.010

22.470

20.156

17.974

18.674

-0.337

-4.622

-4.724

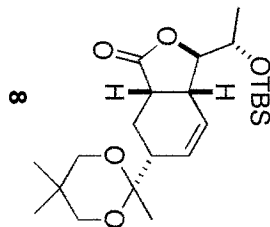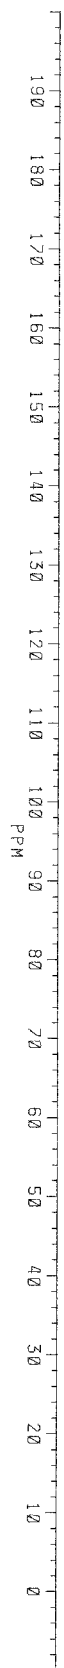

J01100.222  
 DATE 21-9-88  
 SF 120.614  
 CY 74.3300000  
 O1 54000.000  
 S1 65536  
 TD 65536  
 SW 25000.000  
 HZ/PT .763  
 PM 3.0  
 RD 0.0  
 HQ 1.311  
 RG 400  
 NS 32194  
 TE 297  
 FM 31300  
 OZ 6000.000  
 CP 15H 88  
 LB 3.000  
 GB 0.0  
 CX 33.00  
 CY 18.00  
 FI 200.001P  
 FZ -9.998P  
 HZ/CM 640.268  
 PPM/CM 6.364  
 SR 43871.60

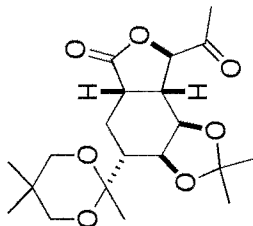

10

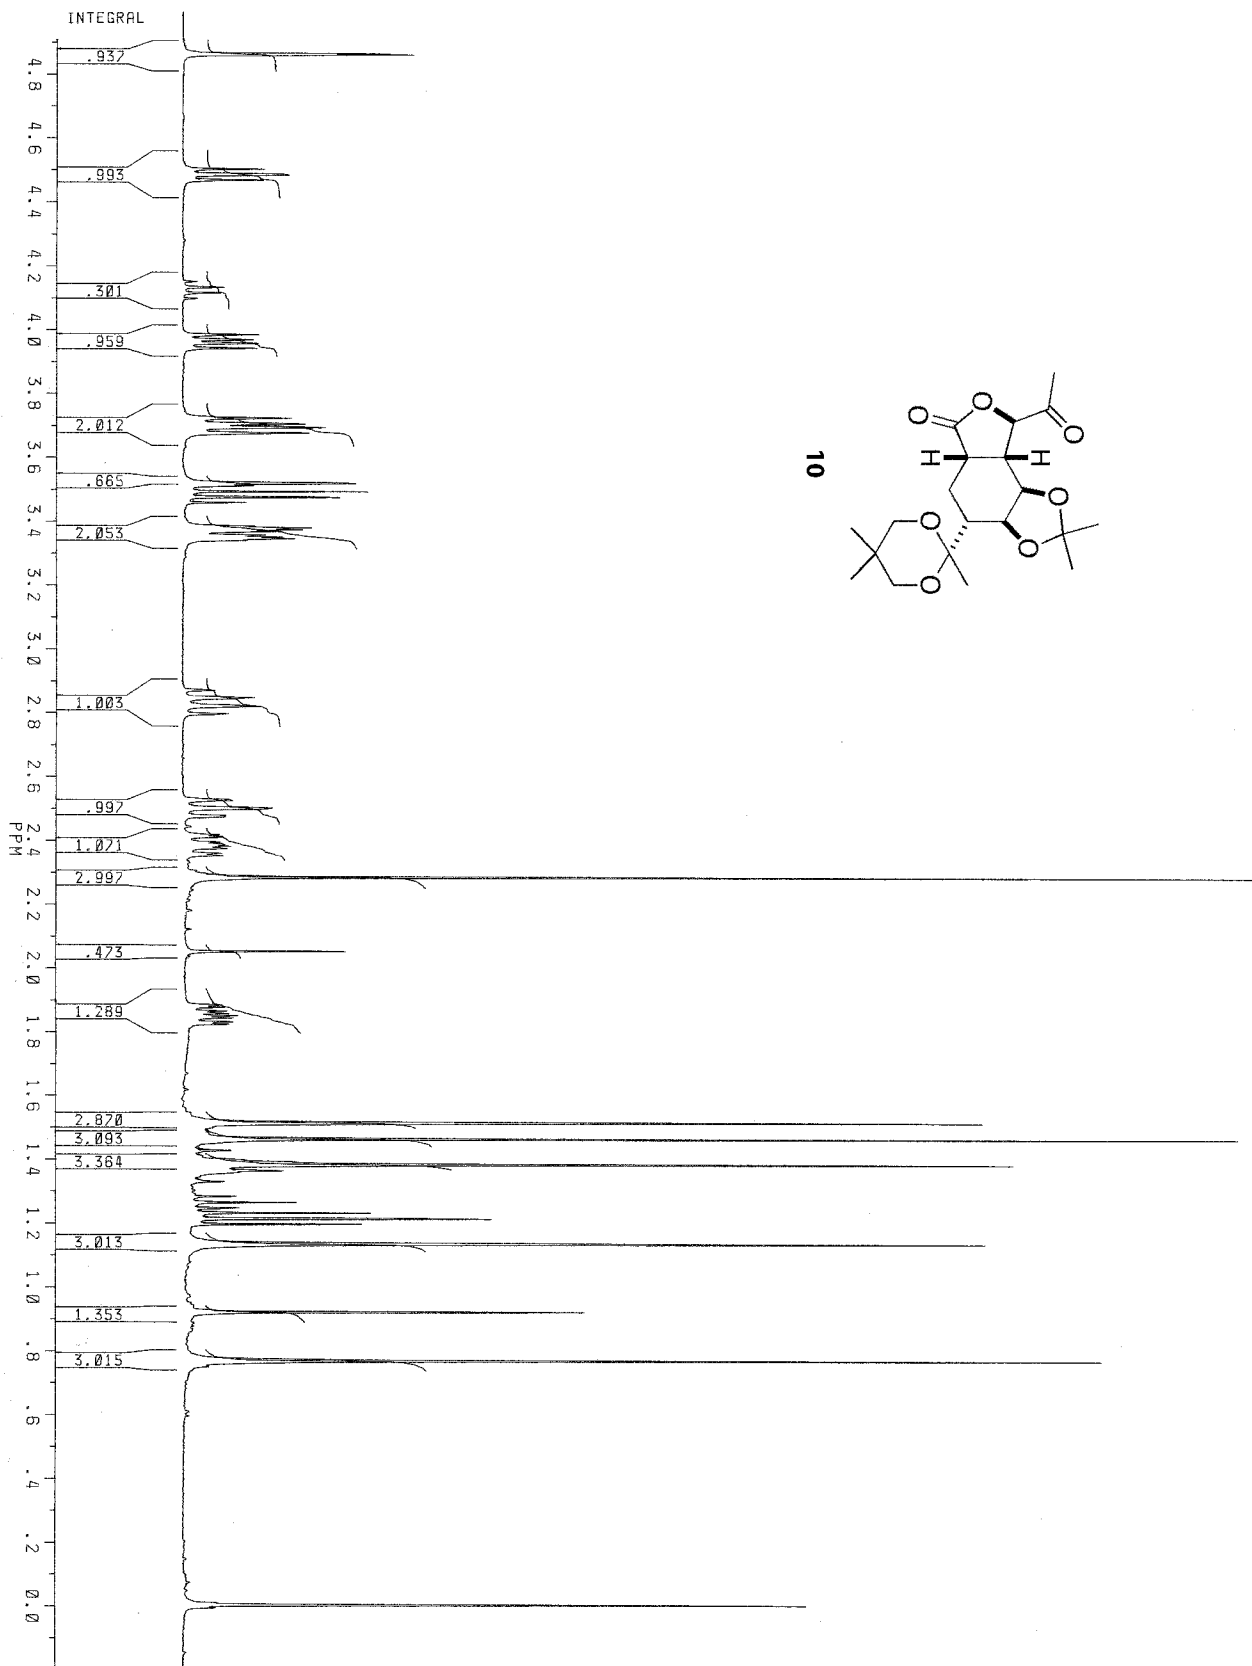

LMI117.401  
 DATE 27-8-88  
 SF 400.134  
 SY 74.8900000  
 OI 6400.000  
 SI 16384  
 TD 16384  
 SW 6024.096  
 HZ/PT .735  
 PW 3.0  
 RD 2.000  
 RG 1.360  
 NS 16  
 TE 287  
 FW 7600  
 OZ 6000.000  
 DP 15H P0  
 LB 0.0  
 GB 0.0  
 CX 33.00  
 CY 0.0  
 F1 5.001P  
 F2 -1.95P  
 HZ/CM 62.986  
 PPM/CM 157  
 SR 4387.31



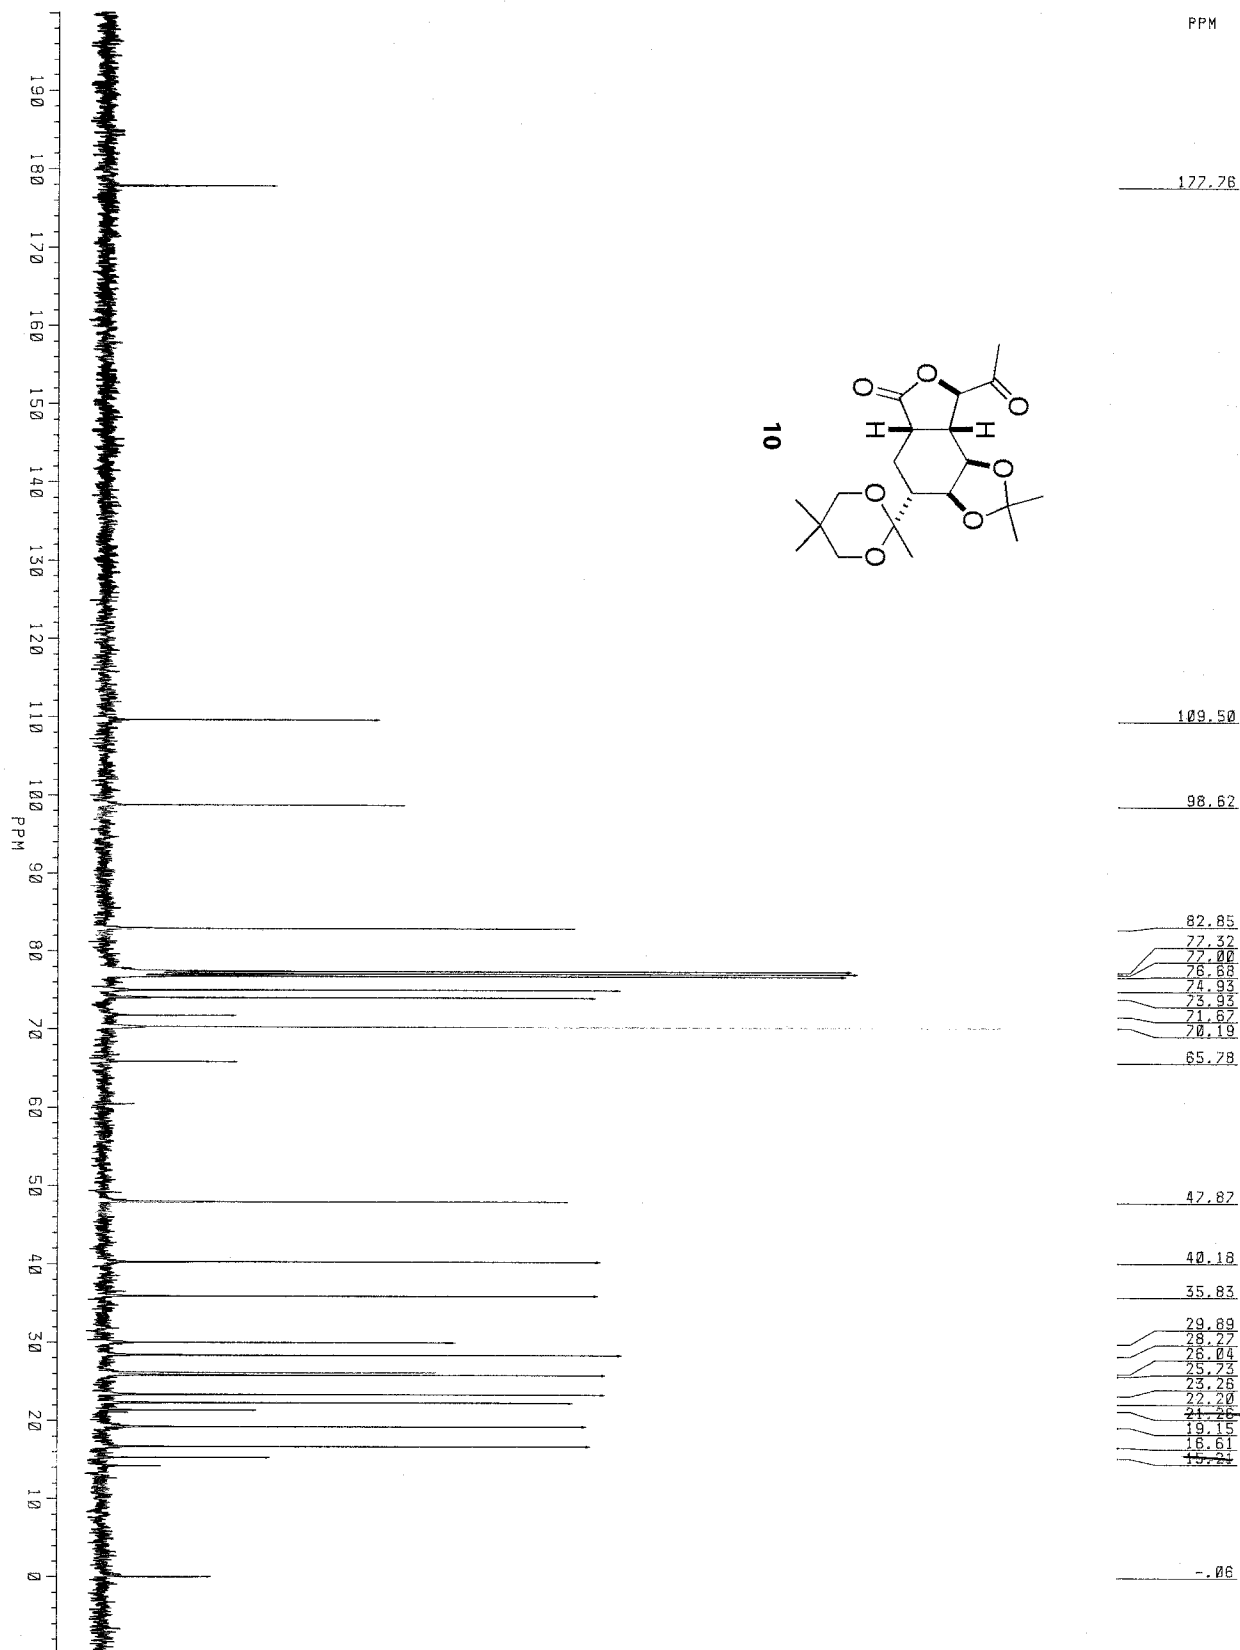

JD1154.201  
DATE 25-8-88

SF 100.614  
ST 74.890000  
O1 3400.000  
SI 65536  
TD 65536  
SW 25000.000  
HZ/PT .763

PW 3.0  
RD 0.0  
RG 1.311  
NS 400  
TE 1880  
297

FW 31300  
O2 6000.000  
DP 15H BB

LB 3.000  
GB 0.0  
CX 33.00  
CY 18.00  
F1 200.001P  
F2 -9.998P  
HZ/CM 640.268  
FM/CM 6.364  
SR 43875.41

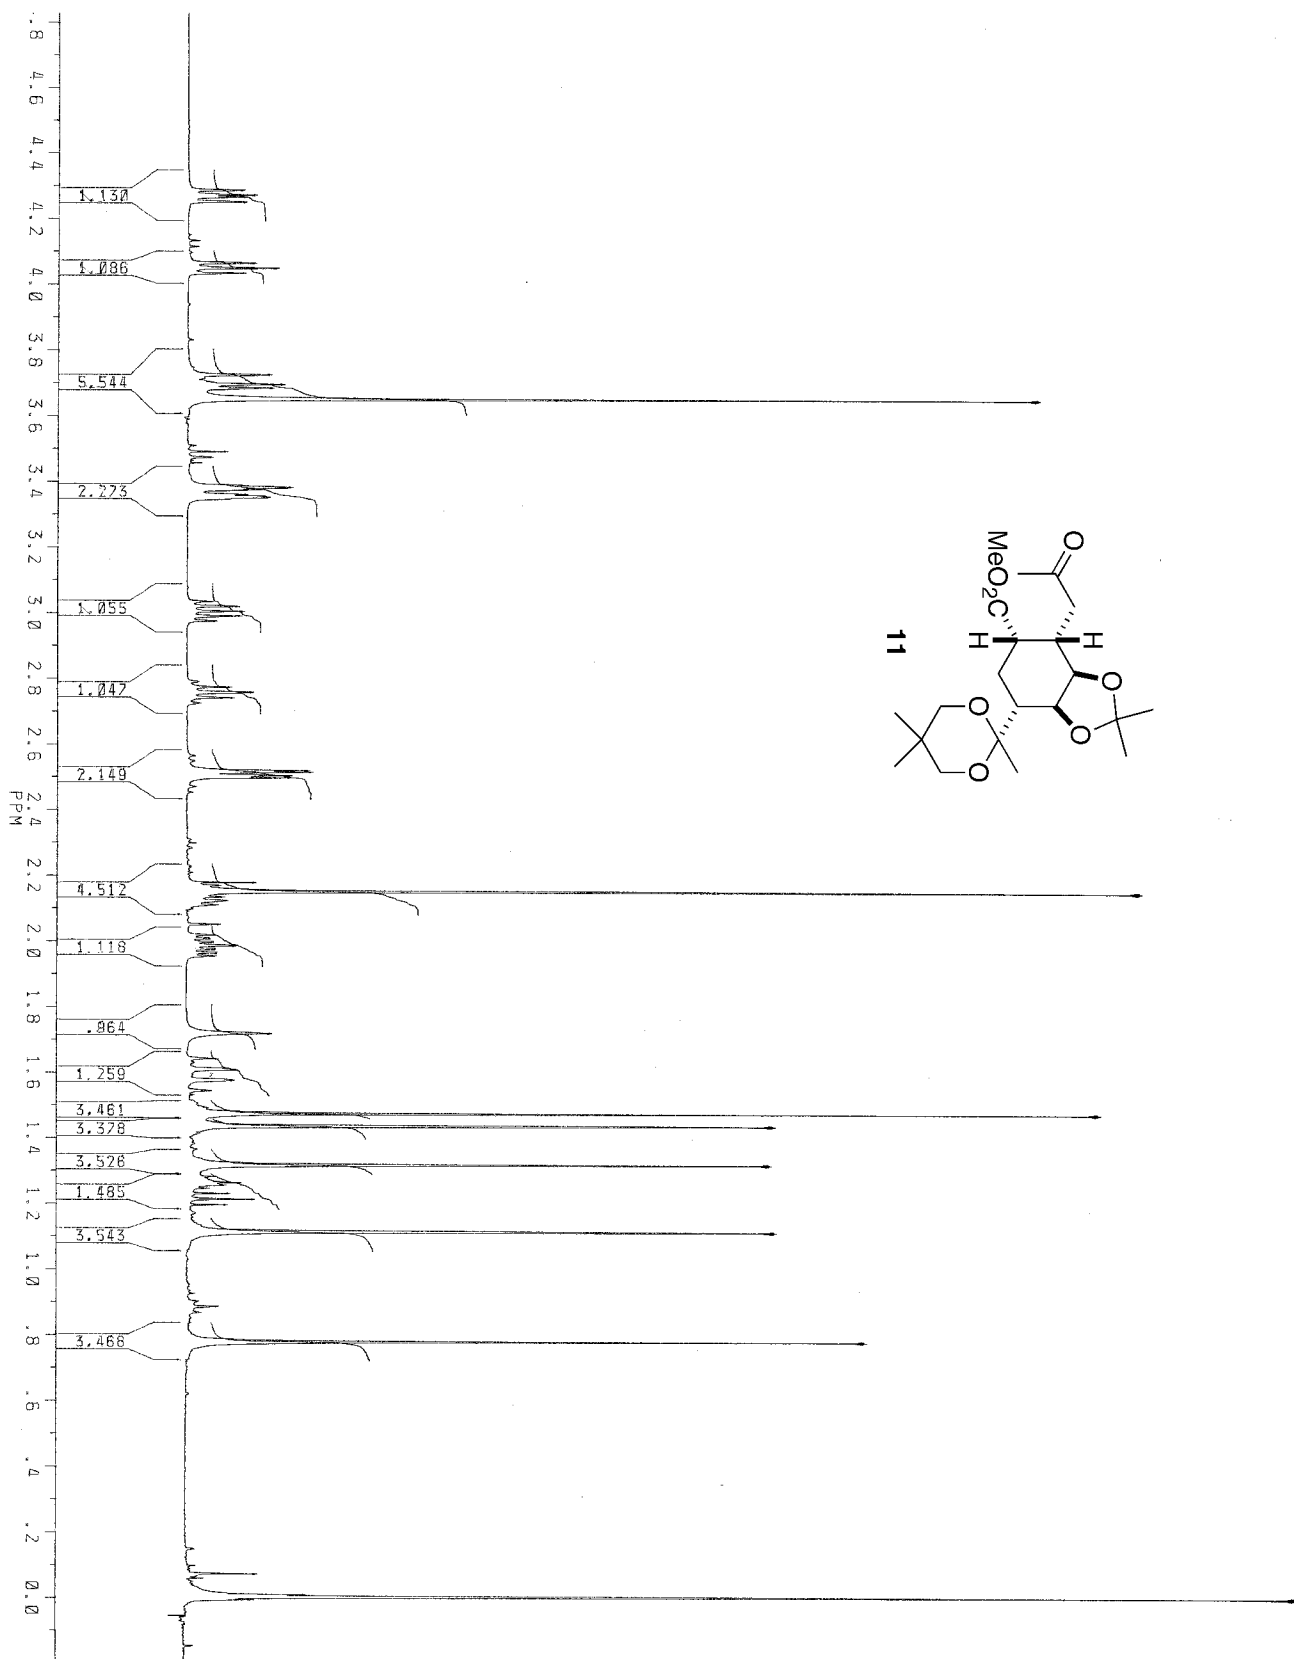

J01187.101  
 DATE 5-10-88  
 SF 400.134  
 ST 74.8900000  
 SI 16384  
 TD 16384  
 SW 6024.096  
 HZ/PT .735  
 PM 3.0  
 RD 2.000  
 RC 1.560  
 NS 32  
 TE 297  
 FW 7600.000  
 OZ 6000.000  
 DP 15H P0  
 LB 0.0  
 CB 0.0  
 CX 35.00  
 CY 0.0  
 F1 5.001P  
 F2 -1.97P  
 HZ/CM 63.018  
 PPM/CM 4598.05  
 SR

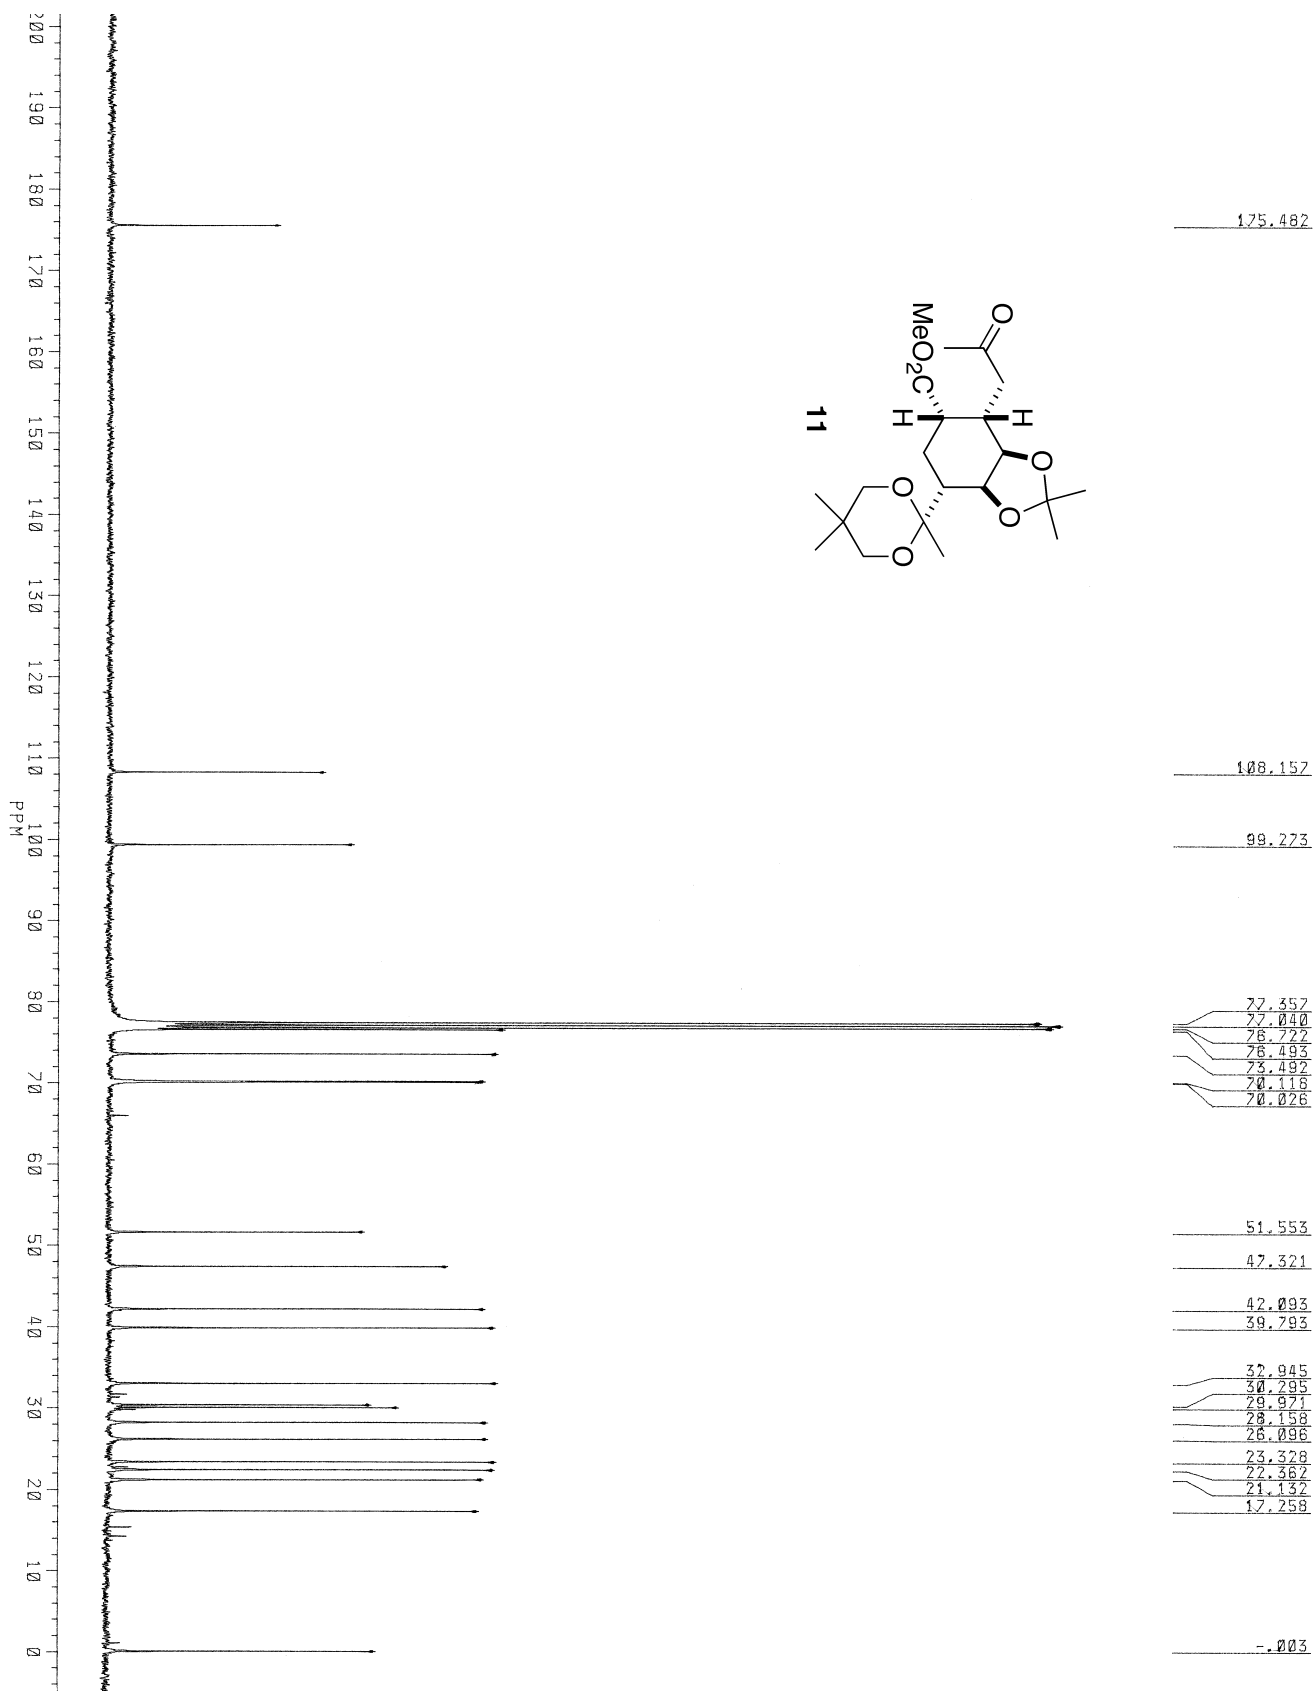

J01187.201  
 DATE 6-10-88  
 SF 100.614  
 ST 74.890000  
 O1 54000.000  
 S1 85536  
 TD 85536  
 SW 25000.000  
 HZ/PT .763  
 PW 3.0  
 RD 0.0  
 AQ 1.311  
 RG 400  
 NS 23813  
 TE 297  
 FW 31300  
 O2 6000.000  
 DP 1SH BB  
 LB 3.000  
 GB 0.0  
 CX 33.00  
 CT 18.00  
 F1 209.999P  
 F2 -4.997P  
 HZ/CM 655.504  
 PPM/CM 6.515  
 SR 45869.69

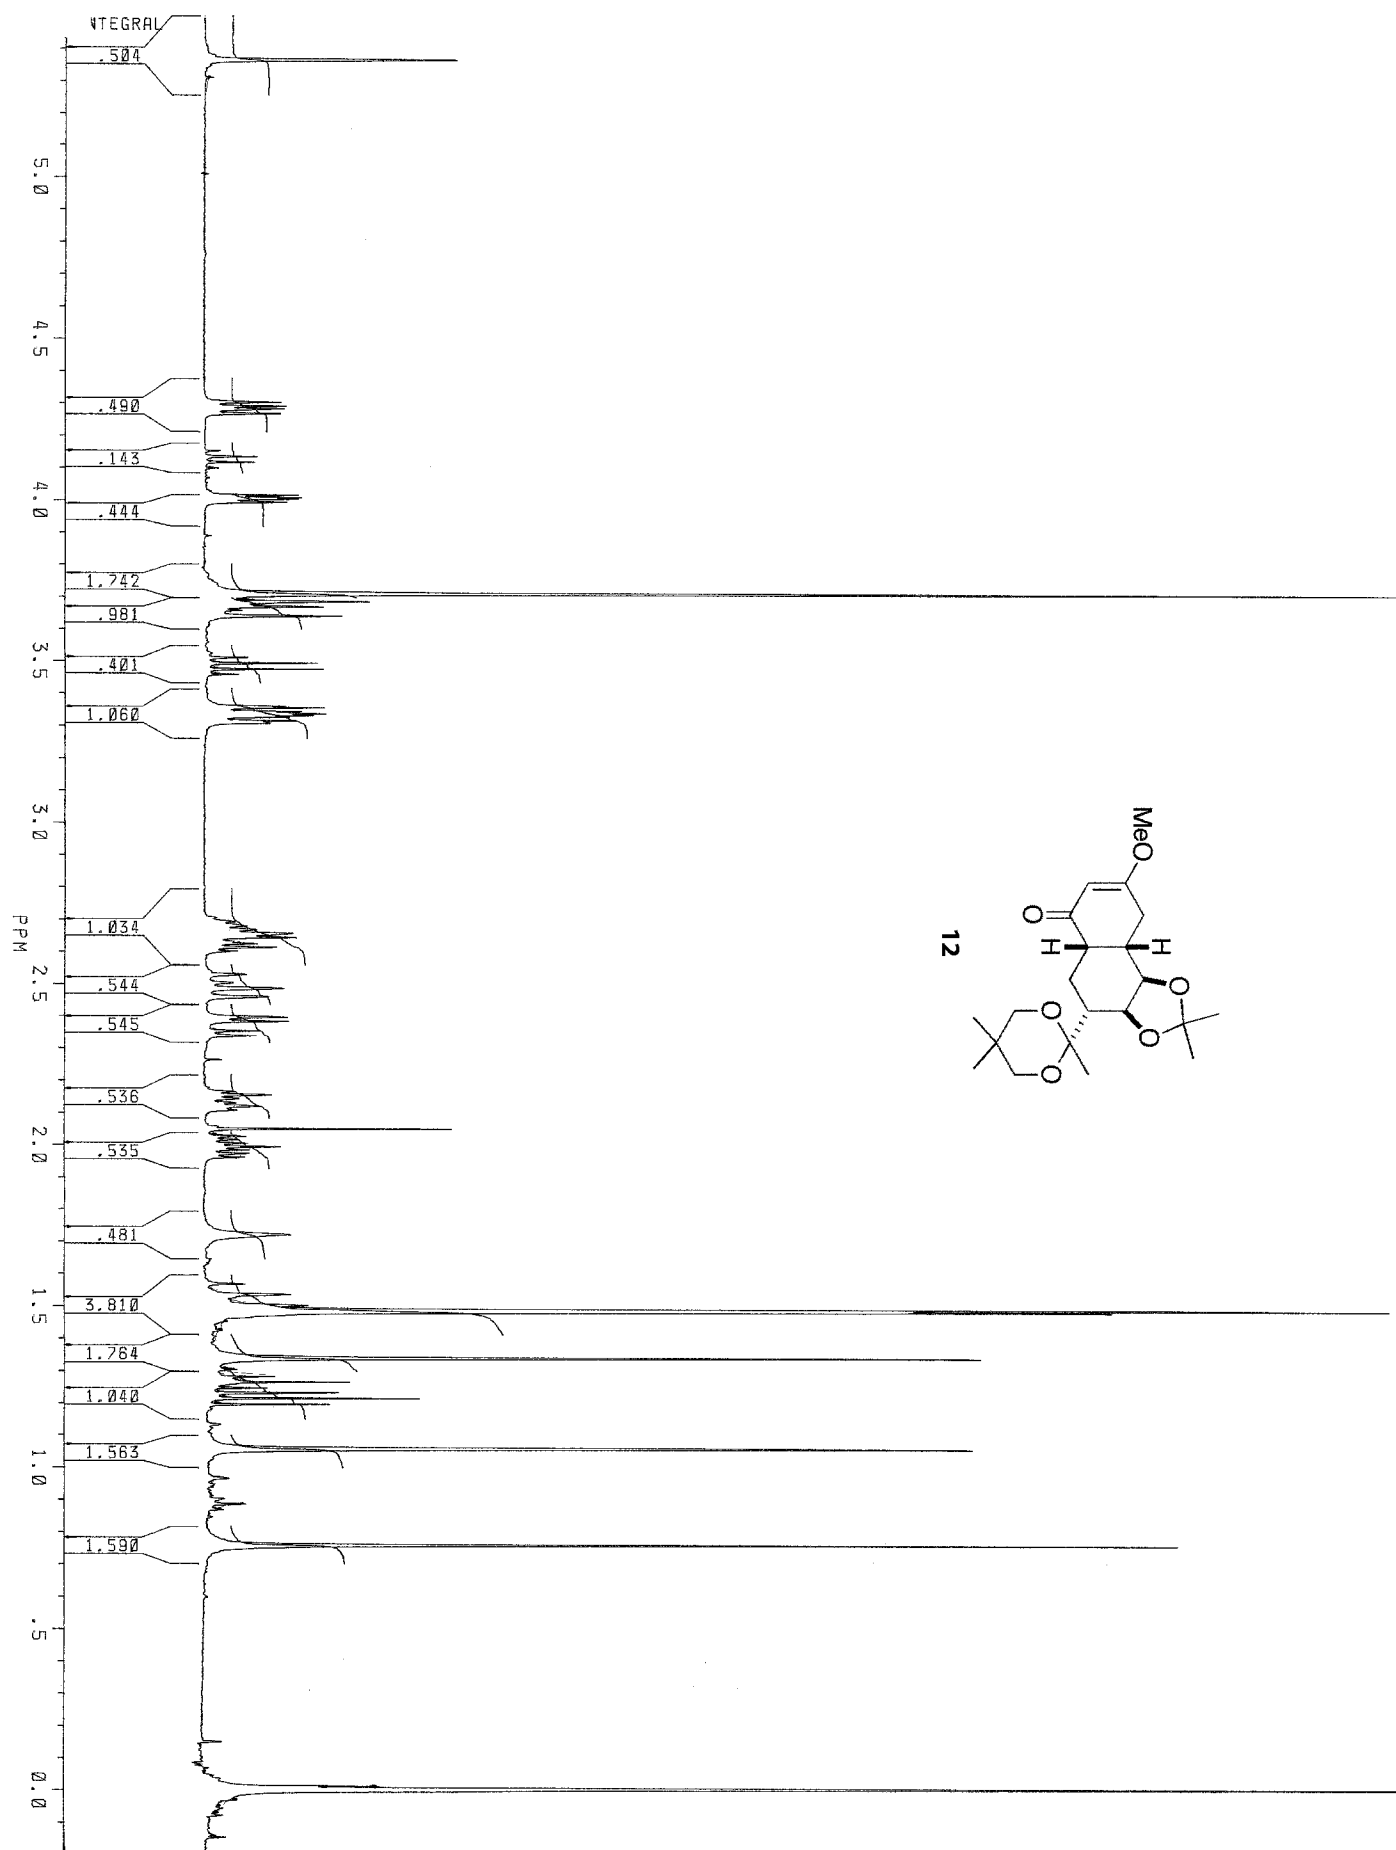

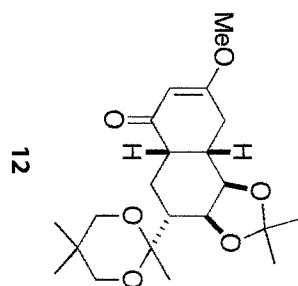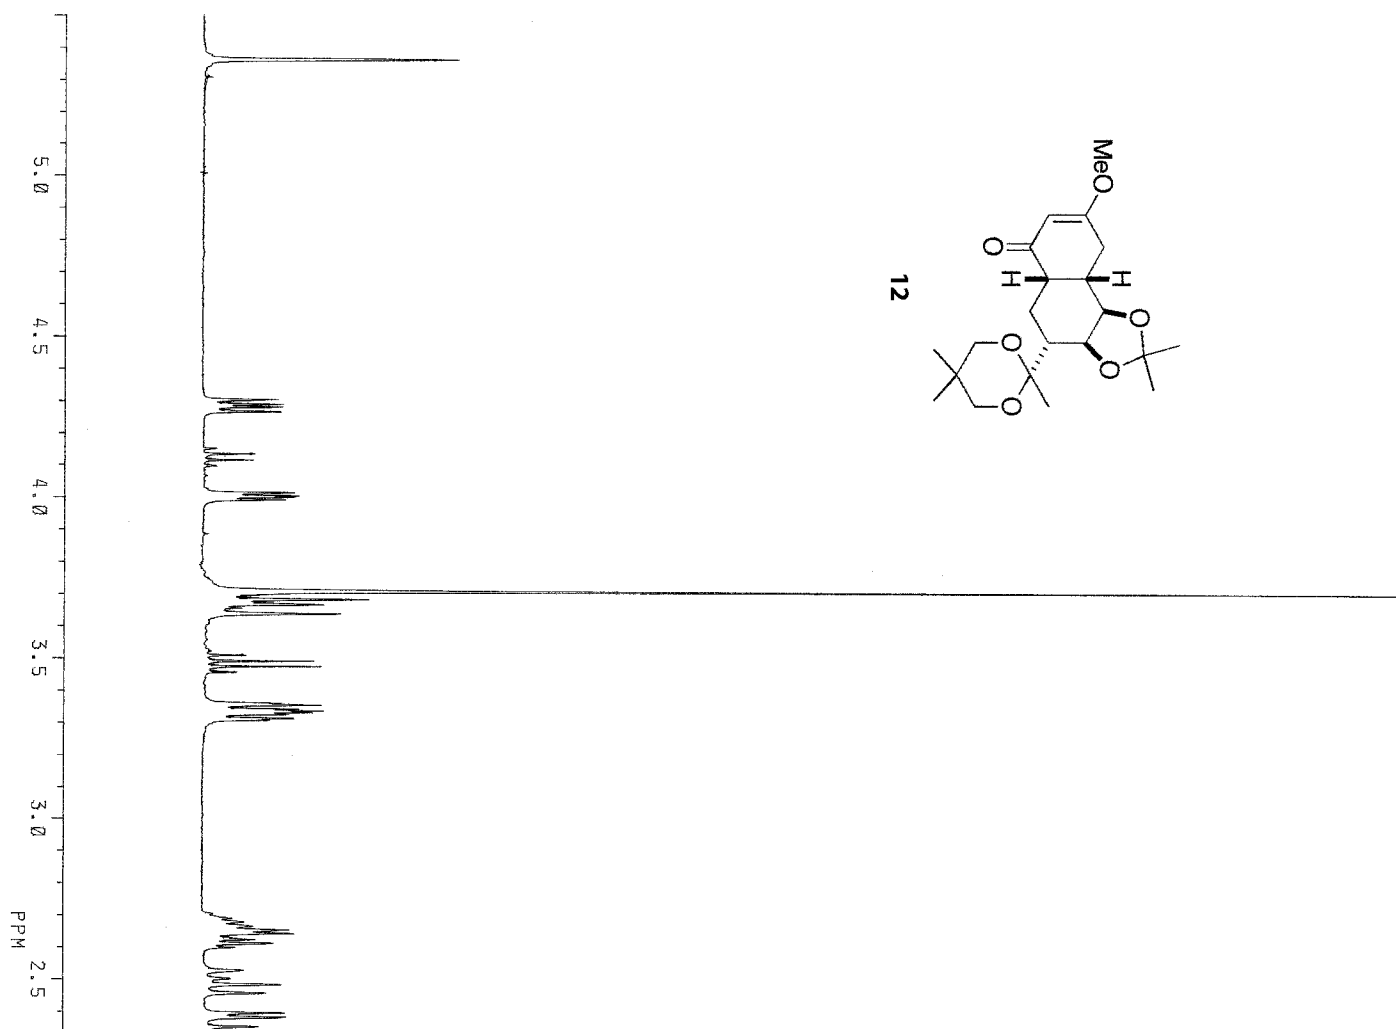

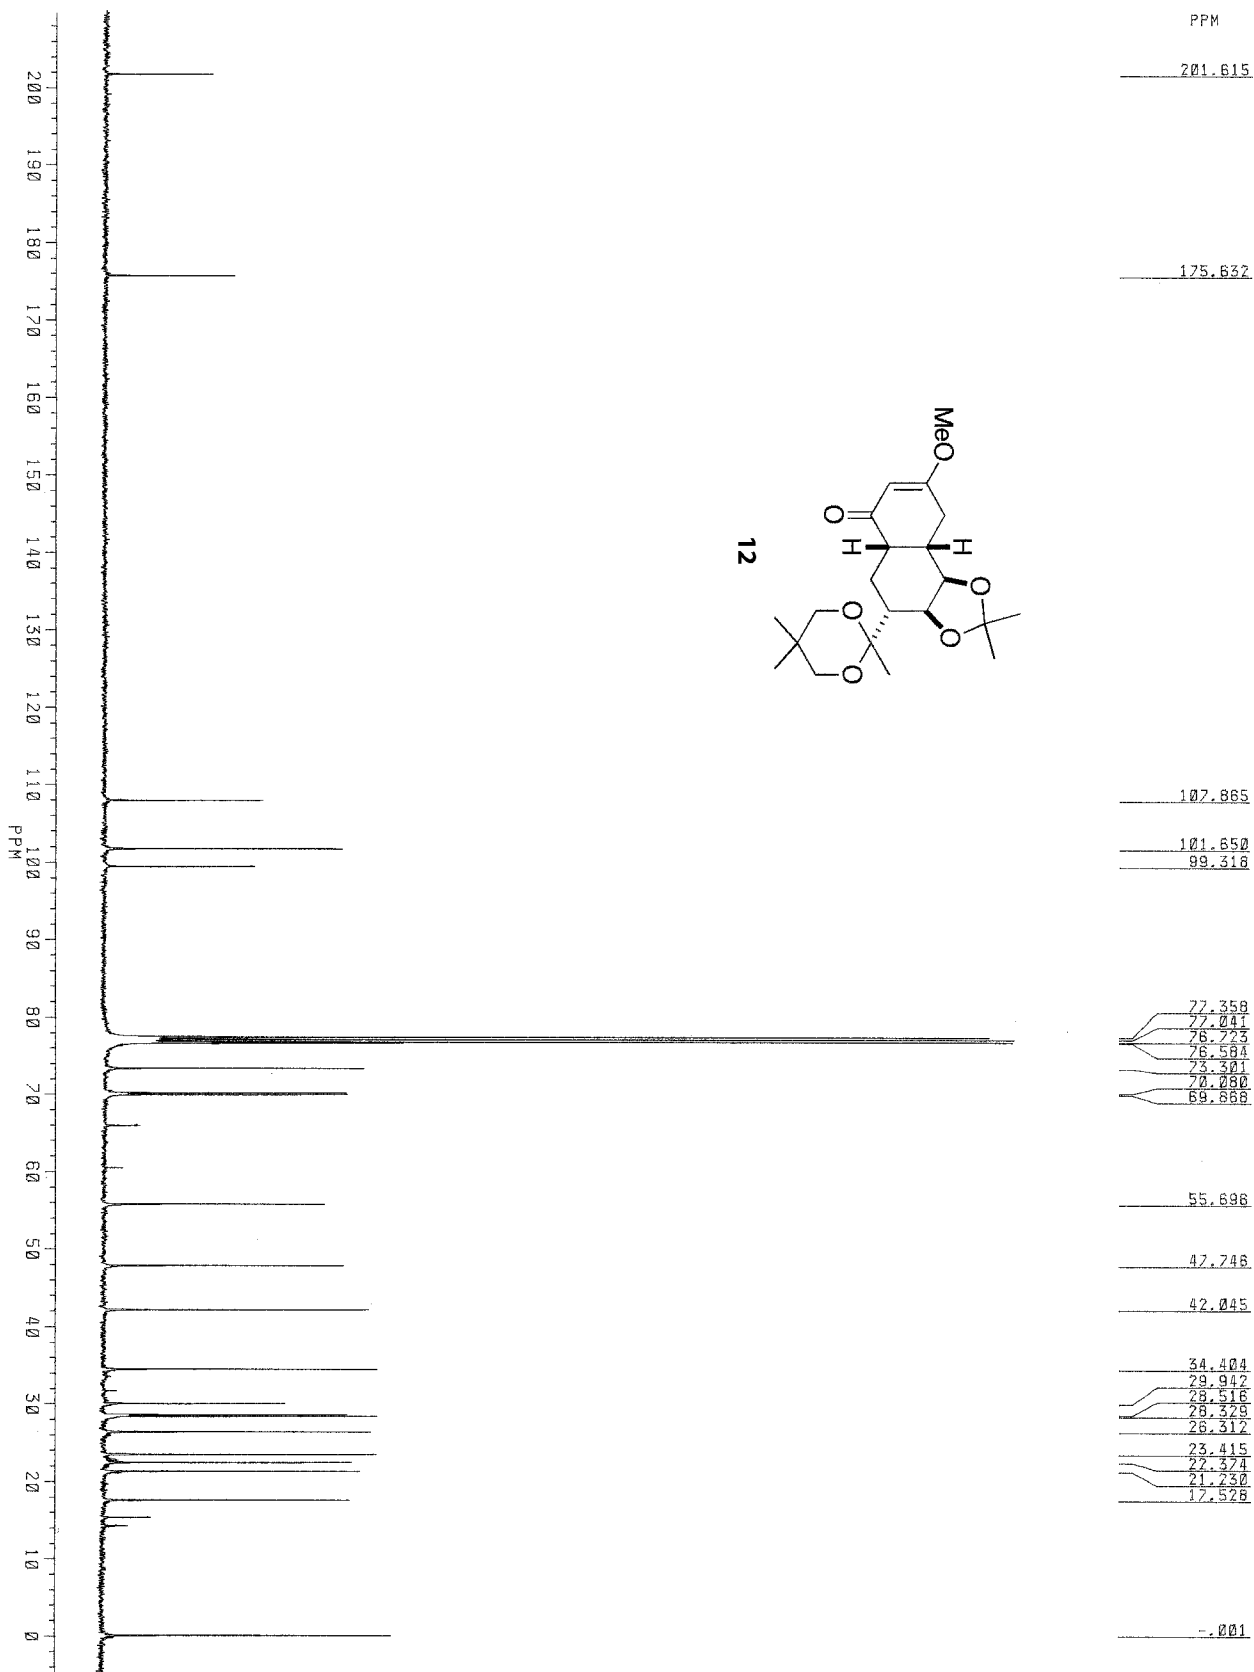

J01194.201  
 DATE 23-10-88  
 SF 100.614  
 ST 24.890000  
 O1 34000.000  
 S1 65536  
 TD 85536  
 SW 25000.000  
 HZ/PT .763  
 PW 3.0  
 RD 0.0  
 RQ 1.311  
 RG 400  
 NS 3516  
 TE 297  
 FW 31300  
 O2 6000.000  
 DP 15H BB  
 LB 3.000  
 GB 0.00  
 CX 33.00  
 CY 18.00  
 F1 209.999P  
 F2 -4.997P  
 HZ/CM 655.504  
 PPM/CM 8.515  
 SR 43868.93

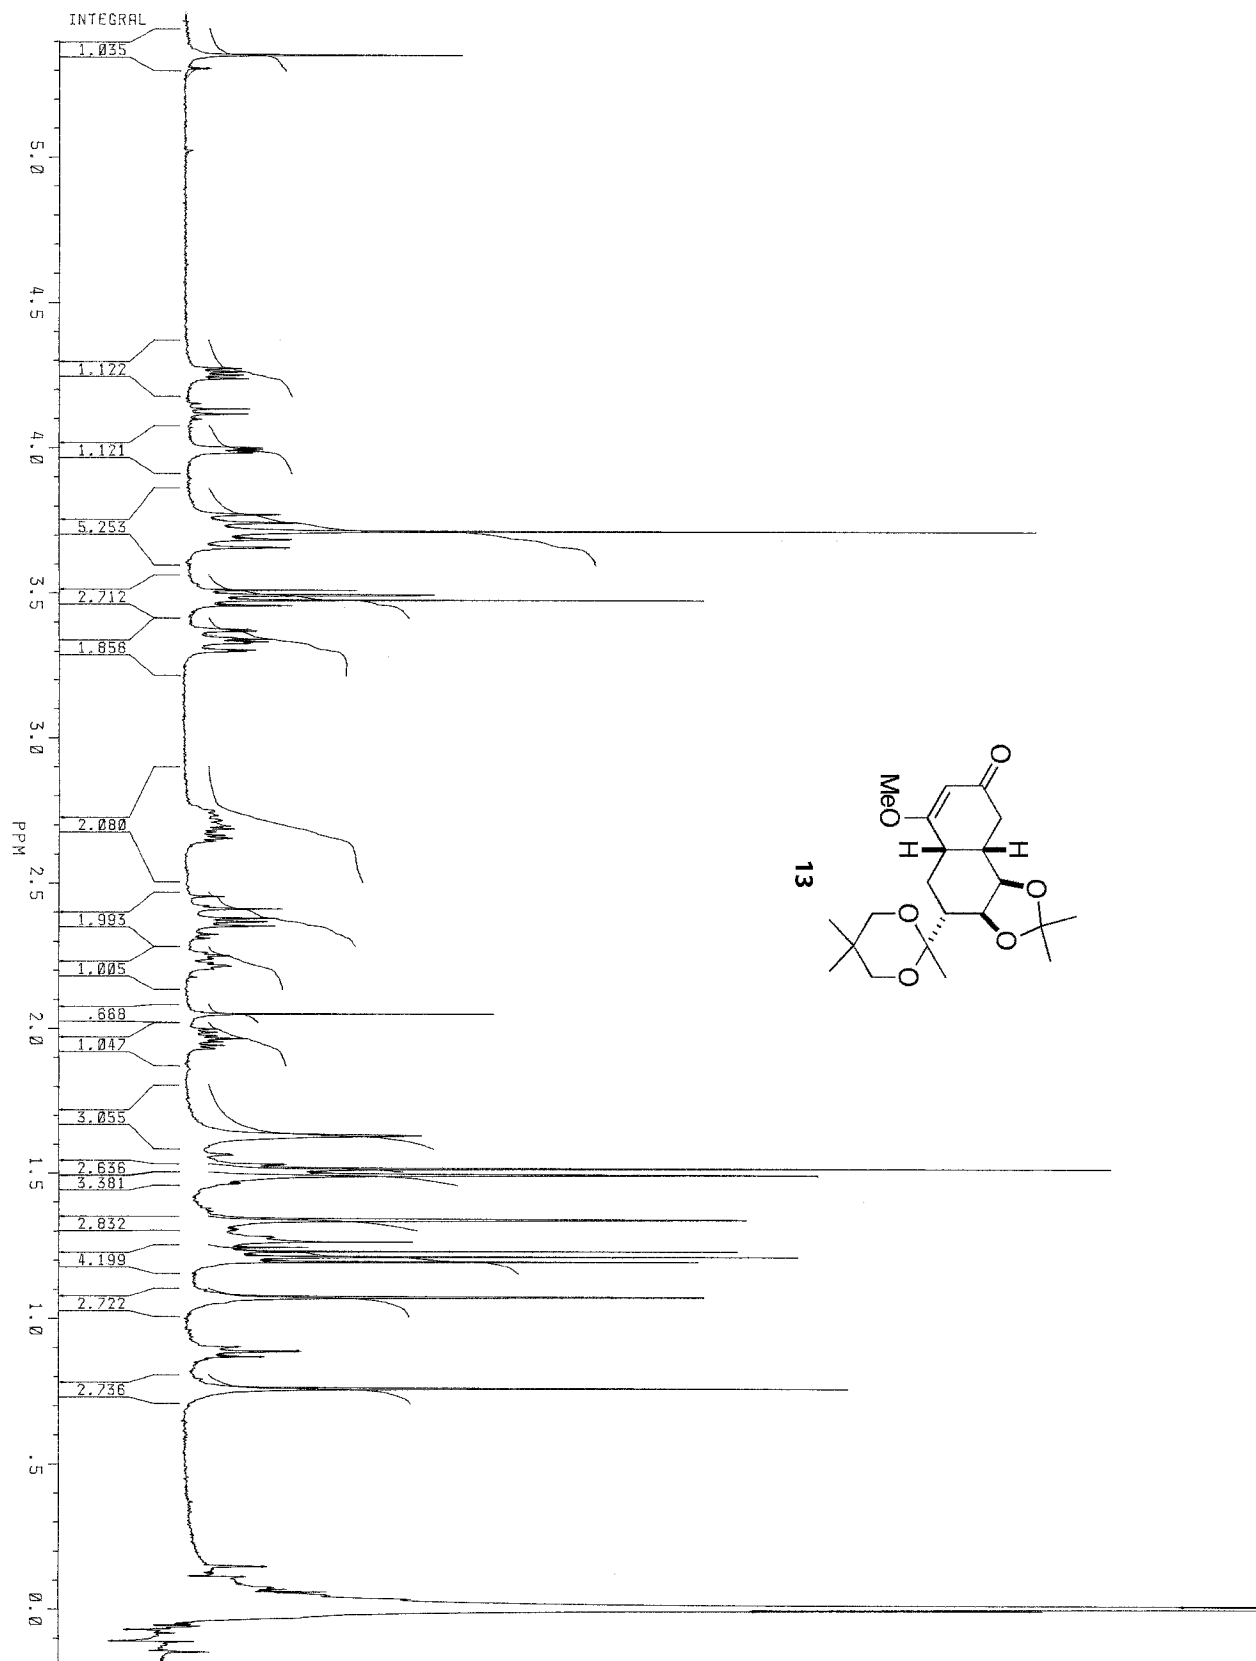

J01194.102  
 DRIE 21-10-86  
 SF 400.134  
 SY 74.8900000  
 O1 6400.000  
 SI 16384  
 TD 16384  
 SW 6024.096  
 HZ/PT 1735  
 PW 3.0  
 RD 2.000  
 RG 1.360  
 NS 32  
 TE 297  
 FW 7600  
 O2 6000.000  
 DP 15H P0  
 LB 0.0  
 CB 0.0  
 CX 33.00  
 CT 0.0  
 F1 5.501P  
 F2 1.95P  
 HZ/CM 69.057  
 PPM/CM 1.173  
 SR 4392.46

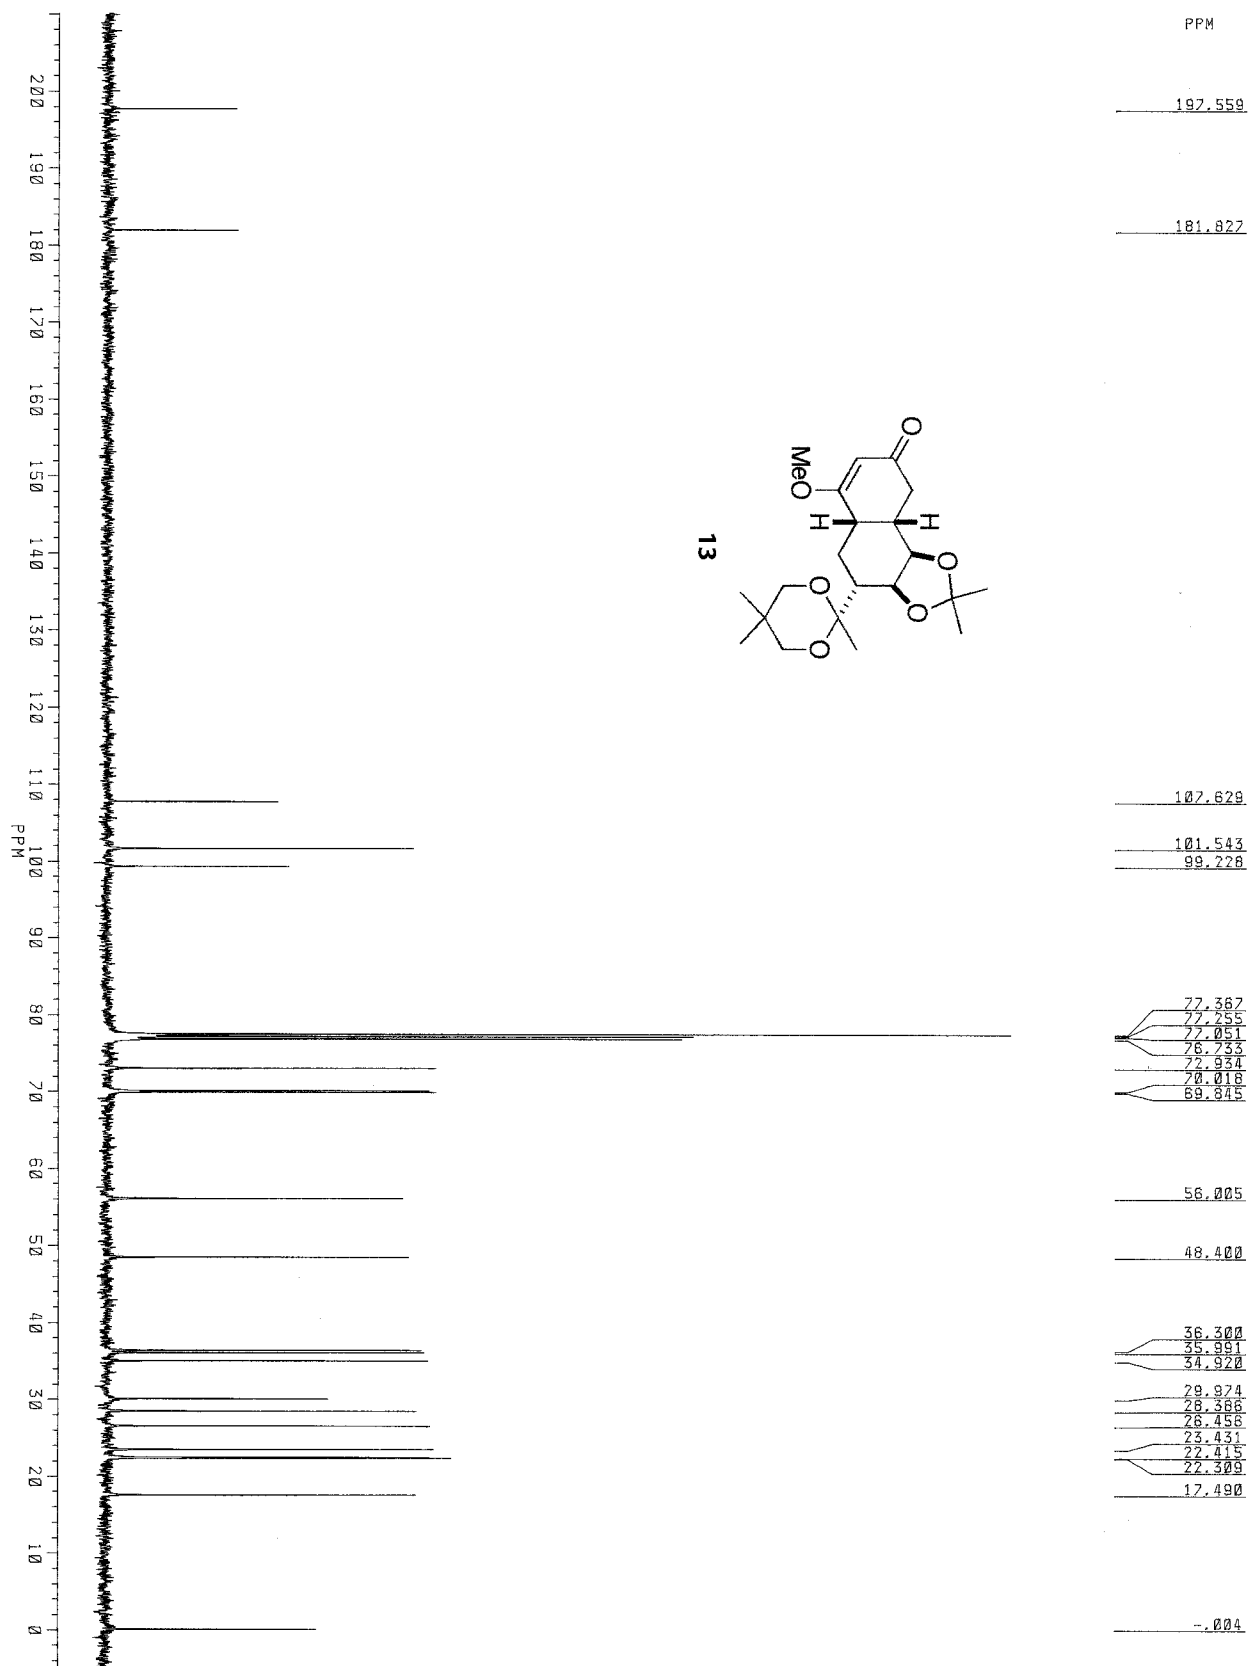

J01194R.002  
 RU PROG:  
 WALTZ RU  
 DATE 25-10-88  
 SF 100.614  
 SY 74.8900000  
 O1 54000.000  
 SI 65536  
 TD 65536  
 SW 25000.000  
 HZ/PT .763  
 PW 3.0  
 RD 0.0  
 RG 1.311  
 NS 400  
 TE 2200  
 287  
 FW 31300  
 O2 5500.000  
 DP 15H D0  
 LB 3.000  
 GB 0.0  
 CX 33.00  
 CY 18.00  
 F1 210.052P  
 F2 -4.936P  
 HZ/CM 655.481  
 PPM/CM 6.515  
 SR 43869.69



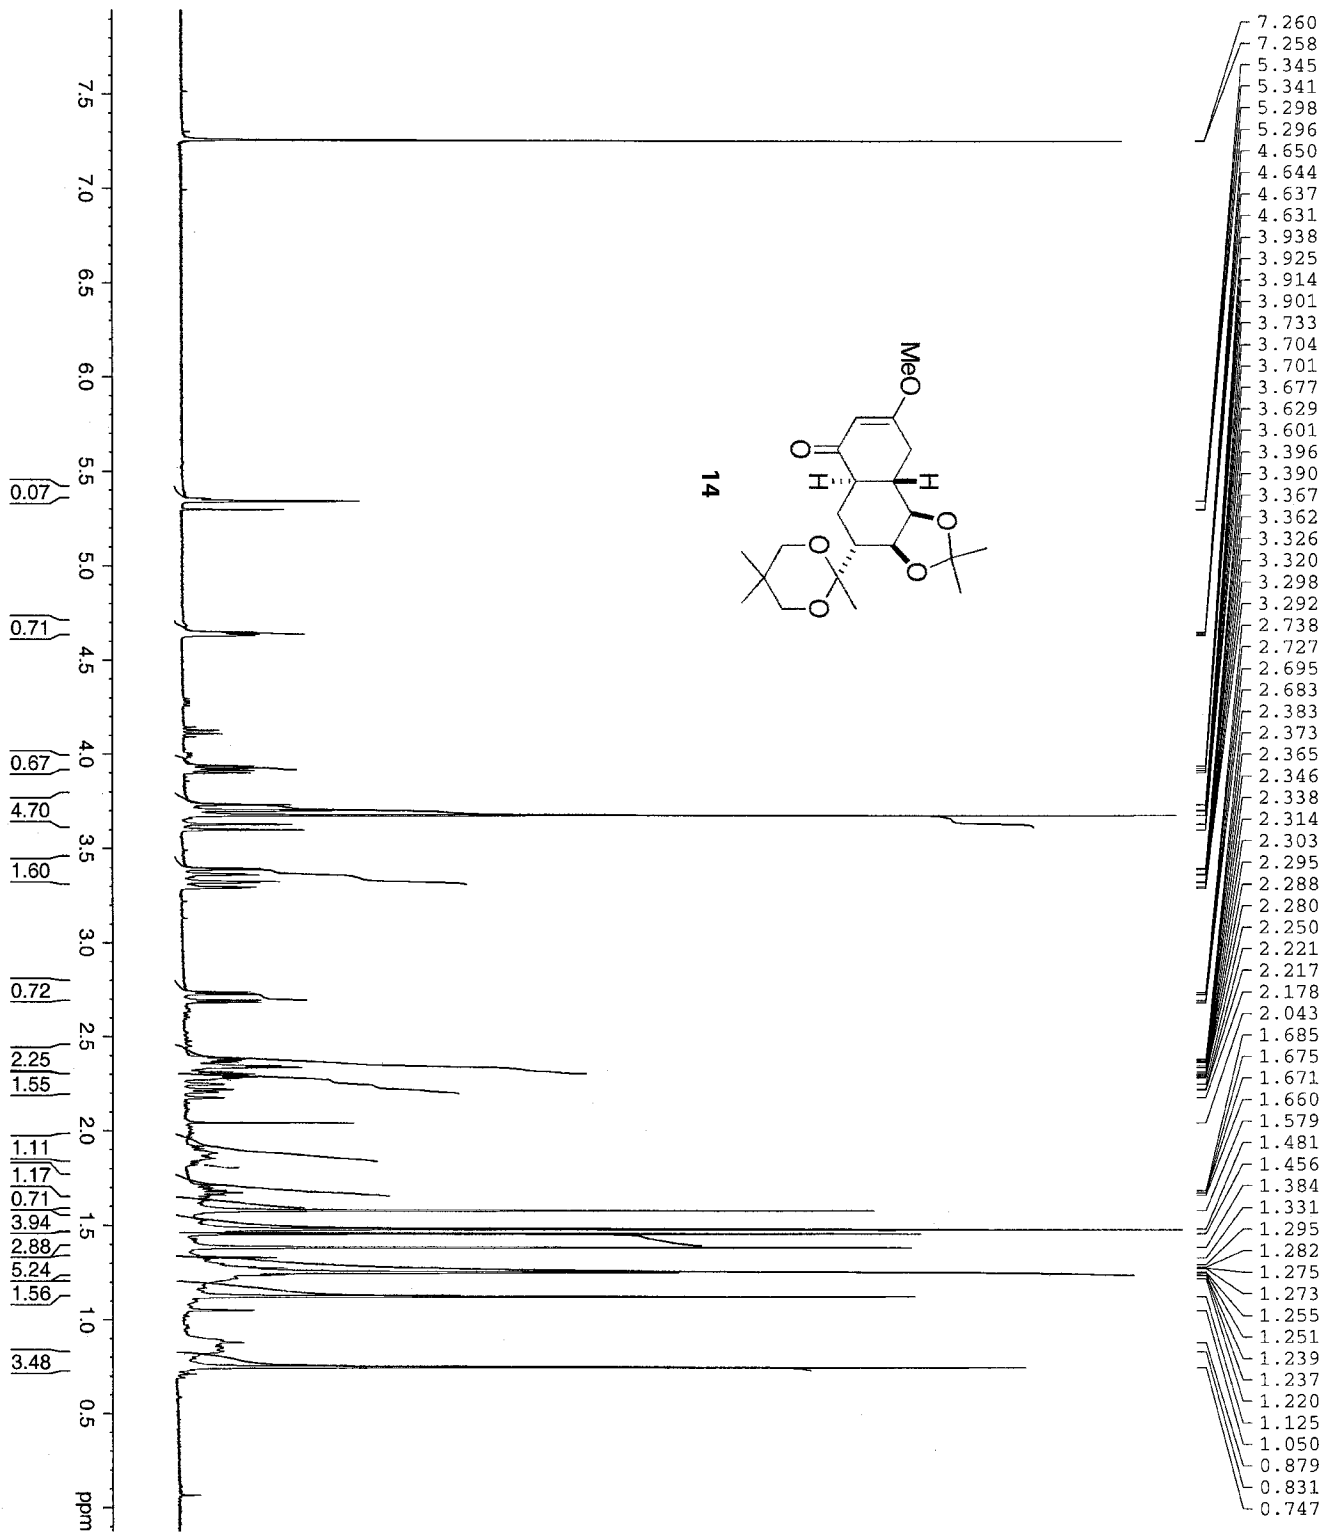

Current Data Parameters

| NAME   | VALUE     |
|--------|-----------|
| NAME   | WM-1-21-1 |
| EXPNO  | 1         |
| PROCNO | 1         |
| USER   | William   |

F2 - Acquisition Parameters

| NAME    | VALUE          |
|---------|----------------|
| Date_   | 20060331       |
| Time    | 17:57          |
| INSTRUM | DPX400         |
| PROBHD  | 5 mm BBO BB-1H |
| PULPROG | zgpg30         |
| TD      | 32768          |
| SOLVENT |                |
| NS      | 32             |
| DS      | 2              |
| SWH     | 6410.256 Hz    |
| FIDRES  | 0.195625 Hz    |
| AQ      | 2.5559540 sec  |
| RG      | 512            |
| DW      | 78.000 usec    |
| DE      | 6.00 usec      |
| TE      | 298.2 K        |
| D1      | 2.00000000 sec |
| TD0     | 1              |

===== CHANNEL f1 =====

| NAME | VALUE           |
|------|-----------------|
| NUC1 | 1H              |
| P1   | 14.70 usec      |
| PL1  | 0.00 dB         |
| SFO1 | 400.0128001 MHz |

F2 - Processing parameters

| NAME | VALUE           |
|------|-----------------|
| SI   | 32768           |
| SF   | 400.0100146 MHz |
| WDW  | no              |
| SSB  | 0               |
| LB   | 0.00 Hz         |
| GB   | 0               |
| PC   | 1.00            |

200.01

176.97

107.38  
101.99  
100.28

79.36  
77.53  
77.10  
76.68  
73.49  
70.39  
70.12  
60.45  
55.70

45.28  
42.88  
40.59  
33.30  
29.84  
28.56  
26.35  
23.46  
22.44  
20.49  
16.62  
14.26

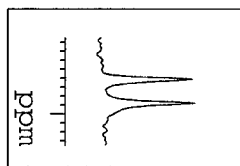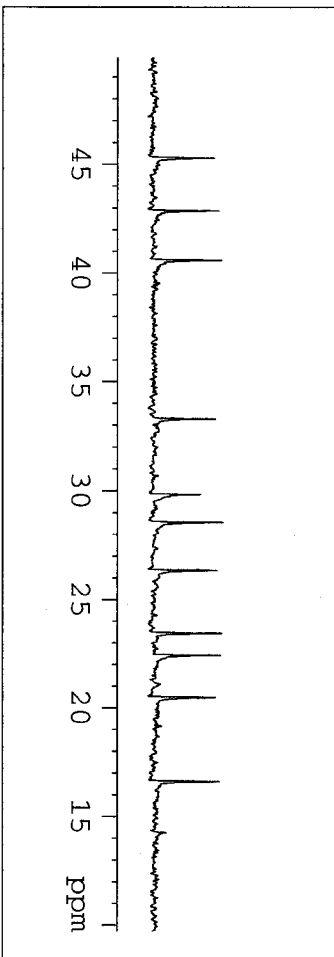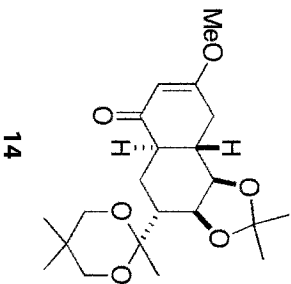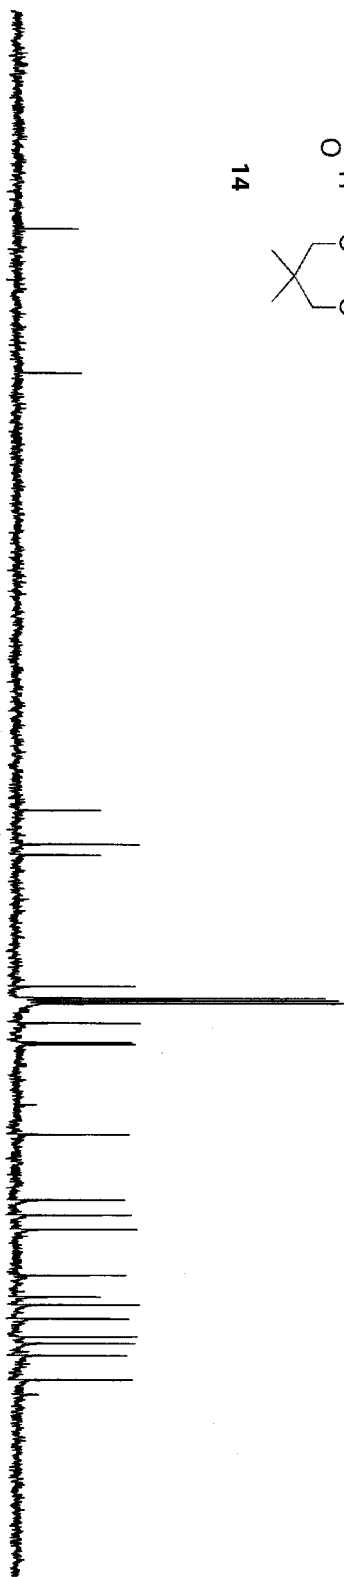

Current Data Parameters  
NAME: wm-I-24-1  
EXNO: 2  
PROCNO: 1  
DU: /n  
USER: William

F2 - Acquisition Parameters  
Date\_: 20060404  
Time: 16.18

INSTRUM: DPX300  
PROBHD: 5 mm QNP 1H/1  
PULPROG: zgpg30  
TD: 65536  
SOLVENT: CDCl3  
DS: 4  
SWH: 18832.393 Hz  
FIDRES: 0.287360 Hz  
AQ: 1.7400308 s  
RG: 9195.2  
DE: 26.550 u  
TE: 6.00 u  
D1: 0.15000001 s  
d11: 0.03000000 s  
DELTA: 0.05000000 s  
TD0: 1

===== CHANNEL f1 =====  
NUC1: 13C  
P1: 8.80 u  
PL1: -3.00 dB  
SFO1: 75.4760505 MHz

===== CHANNEL f2 =====  
CPDPRG2: waltz16  
NUC2: 1H  
PCPD2: 80.00 u  
PL2: -3.00 dB  
PL12: 17.55 dB  
PL13: 17.55 dB  
SFO2: 300.1312005 MHz

F2 - Processing parameters:  
SI: 32768  
SF: 75.4677434 MHz  
WDW: EM  
SSB: 0  
LB: 3.00 Hz  
GB: 0  
PC: 1.40

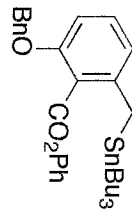

15

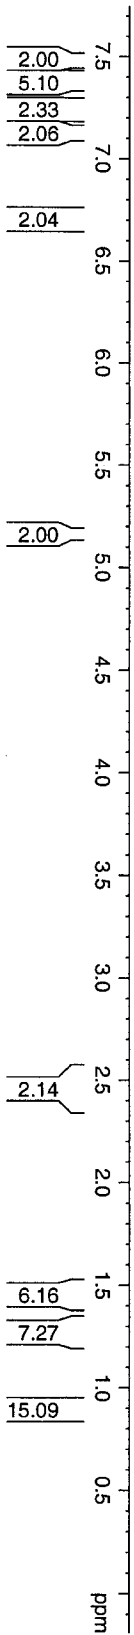

Current Data Parameters  
 NAME: wm-1-39-1  
 EXENO: 1  
 PROCNO: 1  
 DU: 1  
 USER: william

F2 - Acquisition Parameters  
 Date\_: 20060418  
 Time: 19.19  
 INSTRUM: DPX300  
 PROBHD: 5 mm QNP 1H/1  
 PULPROG: zg30  
 TD: 32768  
 SOLVENT: CDCl3  
 NS: 16  
 DS: 2  
 SWH: 4789.272  
 FIDRES: 0.146157  
 AQ: 3.4210291  
 RG: 80.6  
 DW: 104.400  
 DE: 6.00  
 TE: 296.2  
 D1: 2.00000000  
 TDO: 1

==== CHANNEL f1 ===  
 NUC1: 1H  
 P1: 9.00  
 PL1: -3.00  
 SFO1: 300.1321009

F2 - Processing Parameters  
 SI: 32768  
 SF: 300.1300000  
 WDW: no  
 SSB: 0  
 LB: 0.00  
 GB: 0  
 PC: 1.00

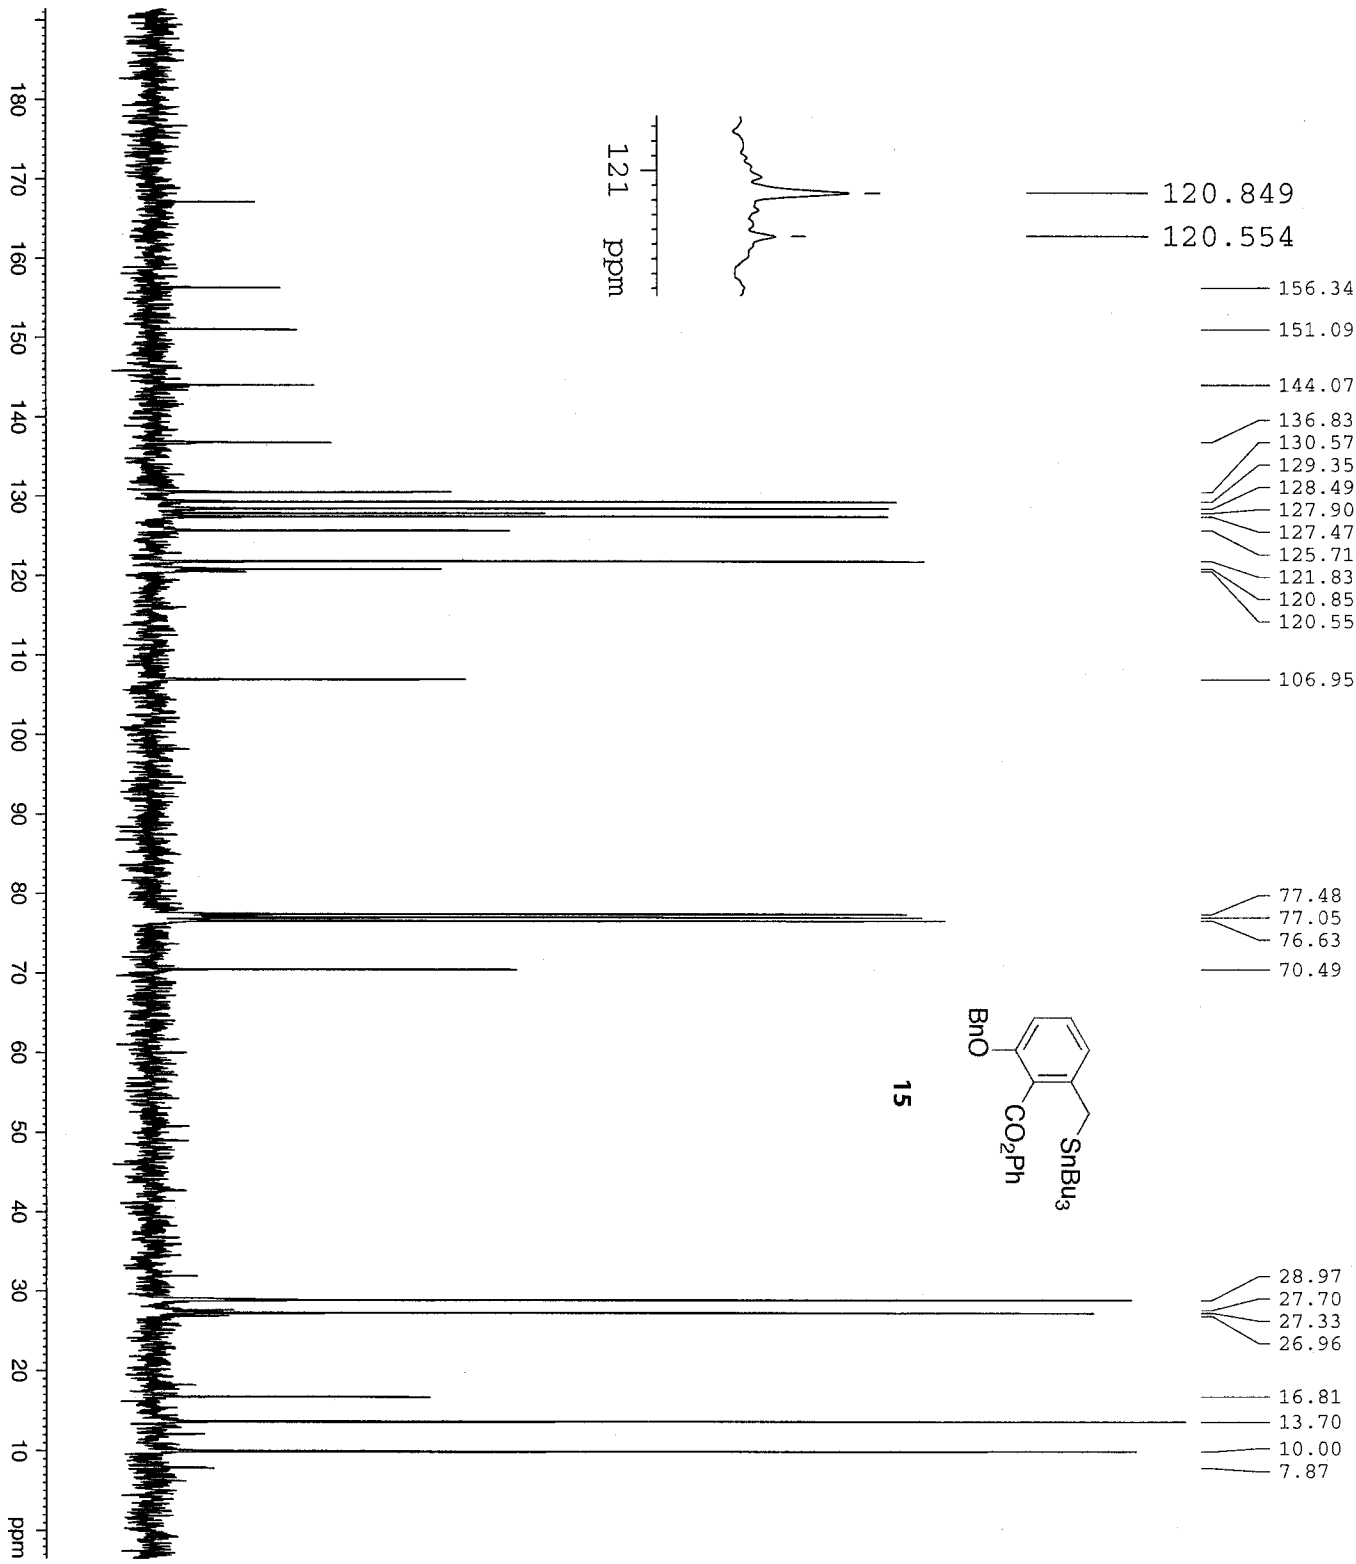

Current Data Parameters  
NAME Wm-1-39-1  
EXPNO 2  
PROCNO 1  
DU /m  
USER William

F2 - Acquisition Parameters  
Date\_ 20060418  
Time 19.23  
INSTRUM DPX300  
PROBHD 5 mm QNP 1H/1  
PULPROG zgpg30  
TD 65536  
SOLVENT CDCl<sub>3</sub>  
NS 208  
DS 4  
SWH 18832.393 Hz  
FIDRES 0.287360 Hz  
AQ 1.7400308 sec  
RG 9195.2  
DW 26.550 usec  
DE 6.00 usec  
TE 296.2 K  
D1 0.1500001 sec  
d11 0.0300000 sec  
DELTA 0.0500000 sec  
TD0 1

===== CHANNEL f1 =====  
NUC1 13C  
P1 8.80 usec  
PL1 -3.00 dB  
SFO1 75.4760505 MHz

===== CHANNEL f2 =====  
CPDPRG2 waltz16  
NUC2 1H  
PCPD2 80.00 usec  
PL2 -3.00 dB  
PL12 17.55 dB  
PL13 17.55 dB  
SFO2 300.1312005 MHz

F2 - Processing parameters  
SI 32768  
SF 75.4677490 MHz  
WDW EM  
SSB 0  
LB 3.00 Hz  
GB 0  
PC 1.40

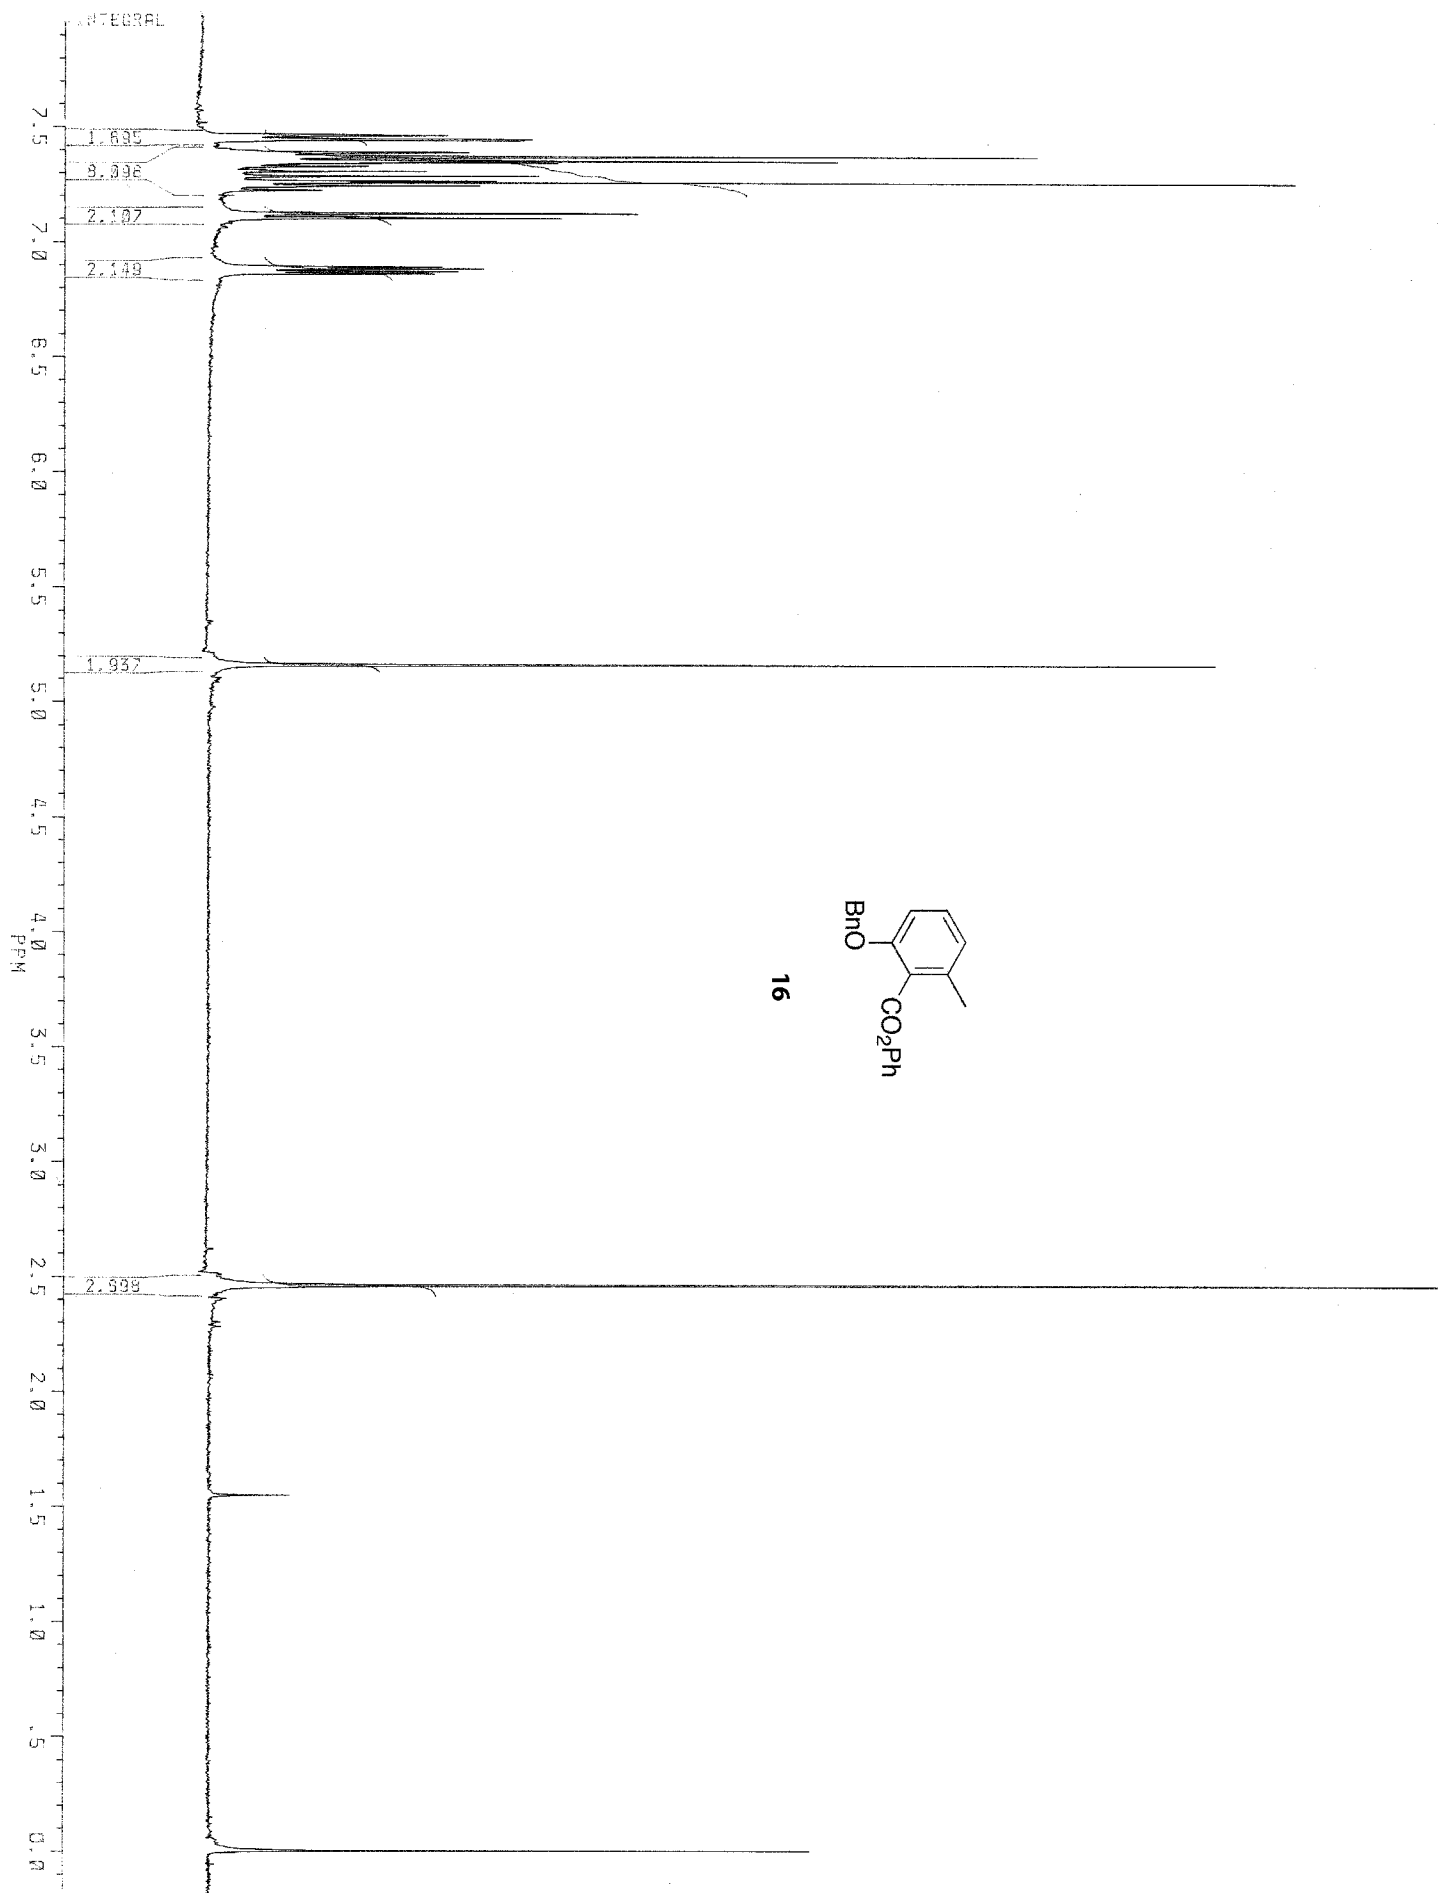

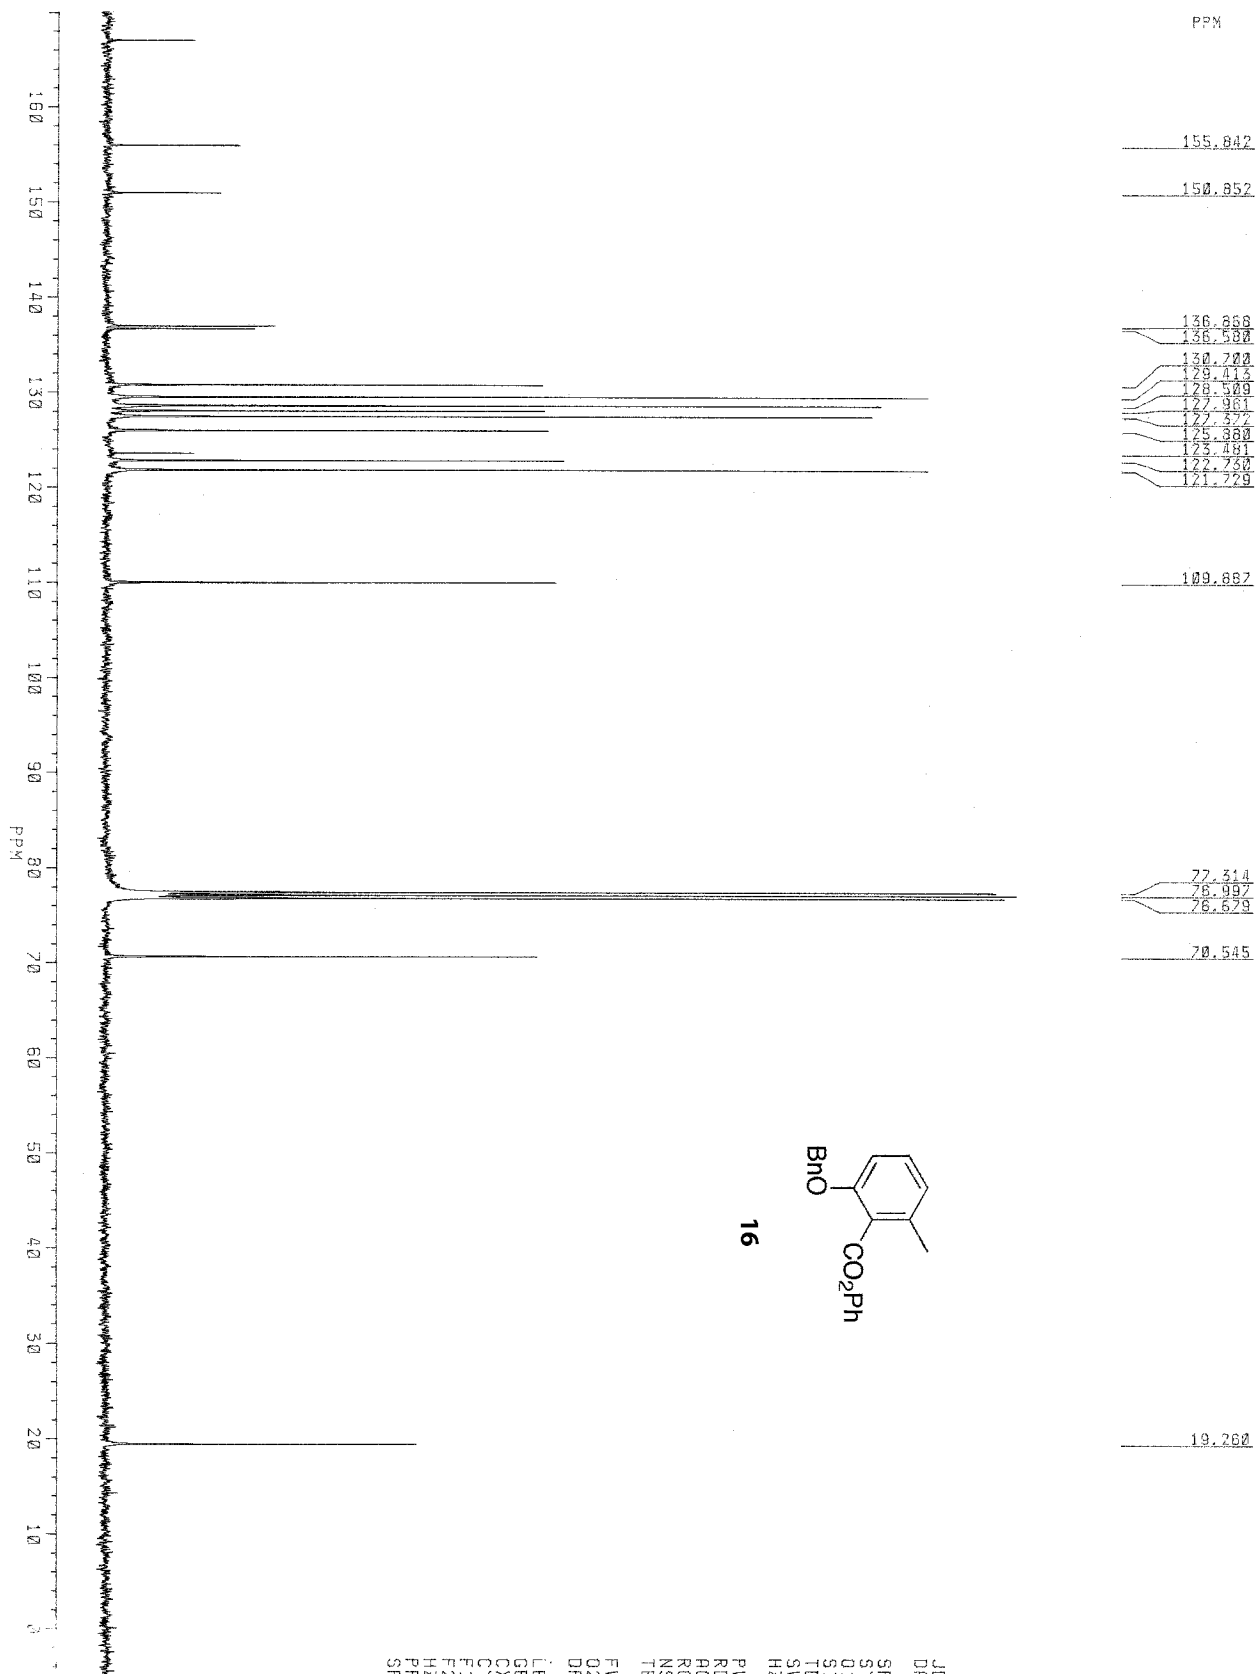

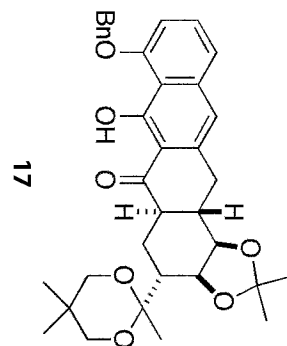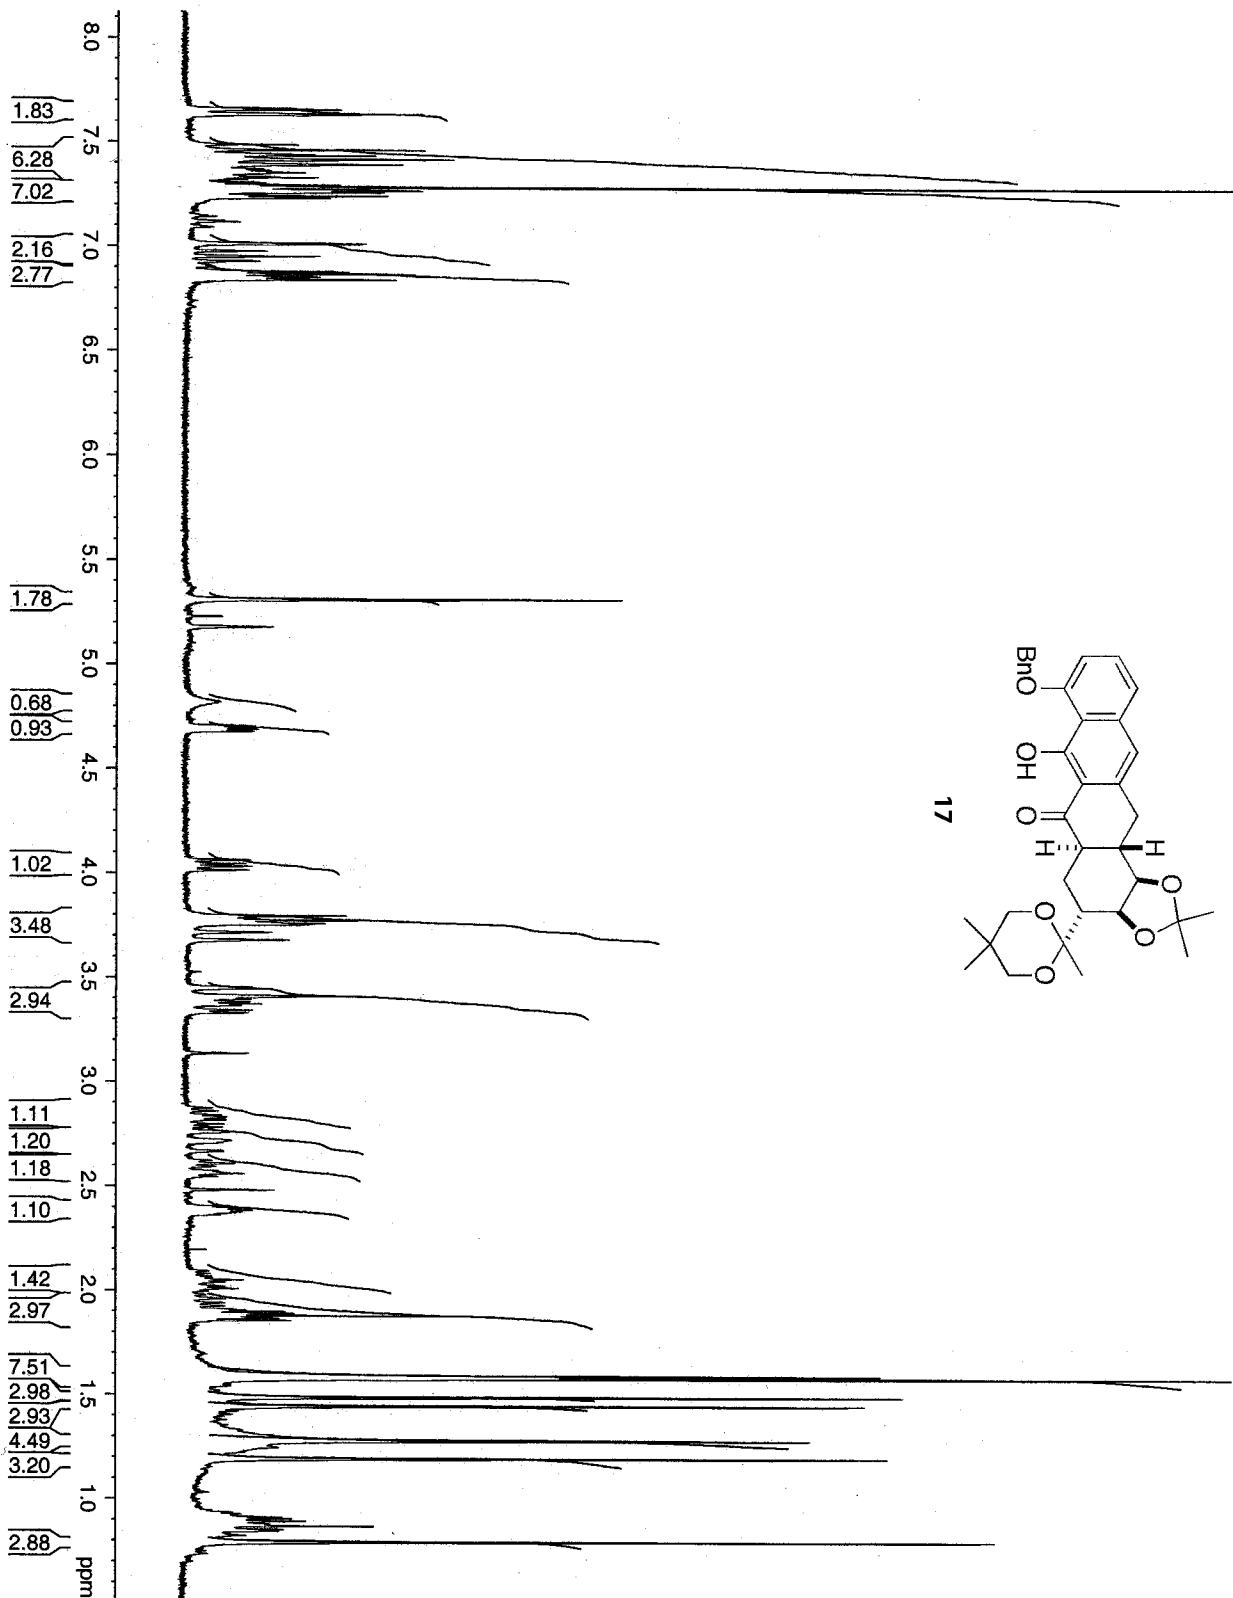

Current Data Parameters  
NAME: w-1-40-1  
EXPNO: 1  
PROCNO: 1  
DU: /m  
USER: william

F2 - Acquisition Parameters  
Date\_: 20060420  
Time: 10.56  
INSTRUM: DPX300  
PROBHD: 5 mm QNP 1H/1  
PULPROG: zg30  
TD: 32768  
SOLVENT: CDCl3  
NS: 32  
DS: 2  
SWH: 4789.272 Hz  
FIDRES: 0.146157 Hz  
AQ: 3.4210291 sec  
RG: 574.7  
DW: 104.400 usec  
DE: 6.00 usec  
TE: 296.2 K  
D1: 2.00000000 sec  
TD0: 1

===== CHANNEL f1 =====  
NUC1: 1H  
P1: 9.00 usec  
PL1: -3.00 dB  
SFO1: 300.1321009 MHz

F2 - Processing parameters  
SI: 32768  
SF: 300.1300000 MHz  
WDW: ho  
SSB: 0  
LB: 0.00 Hz  
GB: 0  
PC: 1.00

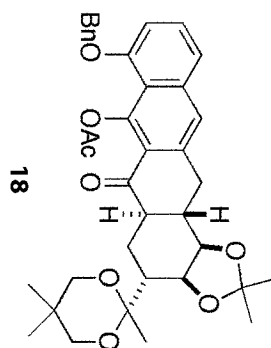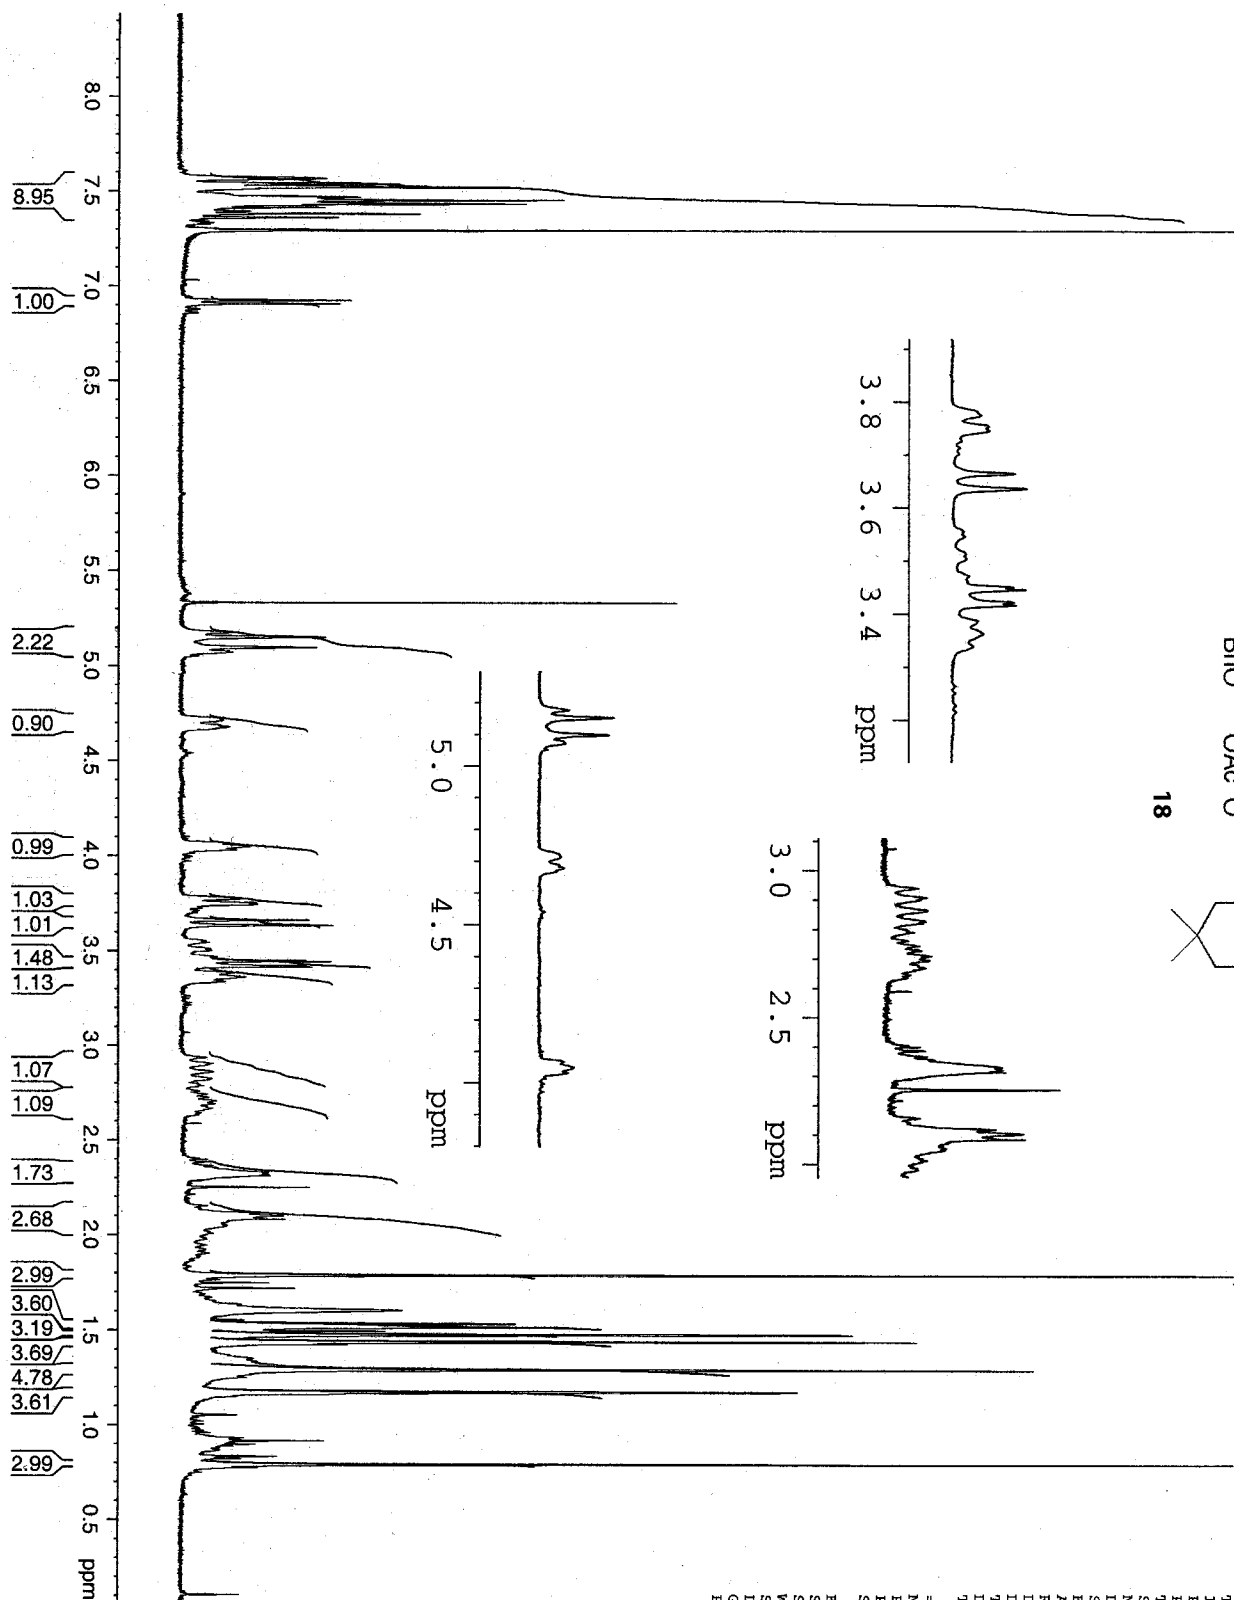

Current Data Parameters  
 NAME: wm-1-70-car  
 EXPNO: 2  
 PROCNO: 1  
 DU: /m  
 USER: William

F2 - Acquisition Parameters  
 Date\_: 20060526  
 Time: 20.58  
 INSTRUM: DPX400  
 PROBHD: 5 mm BBO BB-1H  
 PULPROG: zg30  
 TD: 32768  
 SOLVENT: NS  
 DS: 32  
 SWH: 6410.256 Hz  
 FIDRES: 0.195625 Hz  
 AQ: 2.5559540 sec  
 RG: 512  
 DW: 78.000 usec  
 DE: 6.00 usec  
 TE: 298.2 K  
 D1: 2.00000000 sec  
 TDO: 1

===== CHANNEL f1 =====  
 NUCL: 1H  
 P1: 14.70 usec  
 PL1: 0.00 dB  
 SFO1: 400.0128001 MHz

F2 - Processing parameters  
 SI: 32768  
 SF: 400.0100000 MHz  
 WDM: no  
 SSB: 0  
 LB: 0.00 Hz  
 GB: 0  
 PC: 1.40



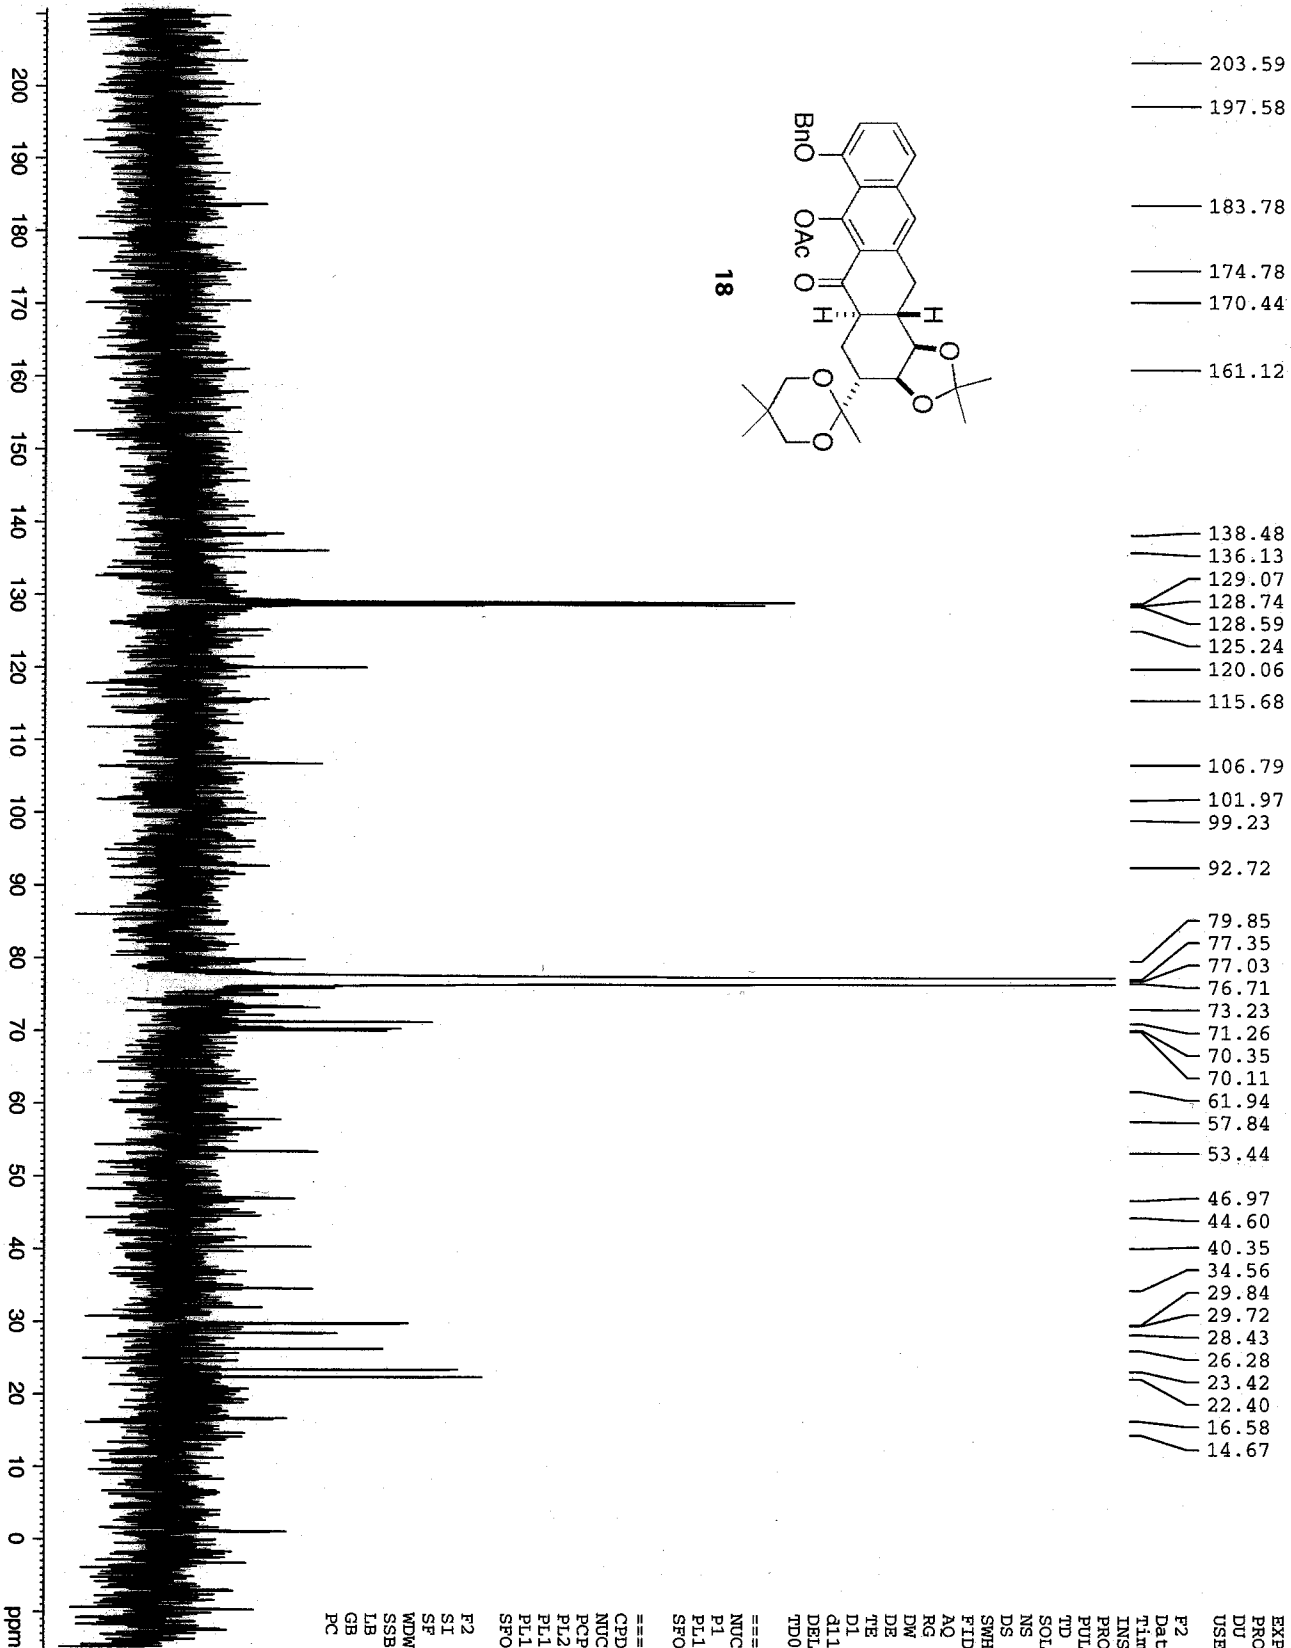

- 203.59
- 197.58
- 183.78
- 174.78
- 170.44
- 161.12
- 138.48
- 136.13
- 129.07
- 128.74
- 128.59
- 125.24
- 120.06
- 115.68
- 106.79
- 101.97
- 99.23
- 92.72
- 79.85
- 77.35
- 77.03
- 76.71
- 73.23
- 71.26
- 70.35
- 70.11
- 61.94
- 57.84
- 53.44
- 46.97
- 44.60
- 40.35
- 34.56
- 29.84
- 29.72
- 28.43
- 26.28
- 23.42
- 22.40
- 16.58
- 14.67

Current Data Parameters  
NAME nm-II-58-1car  
EXPNO 2  
PROCNO 1  
DU /m  
USER William

F2 - Acquisition Parameters  
Date\_ 20060909  
Time 0.09  
INSTRUM DPX400  
PROBHD 5 mm BBO BB-1H  
PULPROG zgpg30  
TD 65536  
SOLVENT NS  
DS 26624  
SWH 25125.629 H:  
FIDRES 0.383387 H:  
AQ 1.3042164 s:  
RG 4597.6  
DM 19.900 u:  
DE 6.00 u:  
TE 298.2 K  
D1 0.15000001 s:  
d11 0.03000000 s:  
DELTA 0.05000000 s:  
TD0 1

===== CHANNEL f1 =====  
NUC1 13C  
P1 7.80 u:  
PL1 -3.00 dB  
SFO1 100.5936591 MHz

===== CHANNEL f2 =====  
CPDPRG2 waltz16  
NUC2 1H  
PCPD2 135.00 u:  
PL2 17.40 dB  
PL12 17.40 dB  
PL13 17.40 dB  
SFO2 400.0116000 MHz

F2 - Processing parameters:  
SI 32768  
SF 100.5825950 MHz  
WDW EM  
SSB 0  
LB 3.00 Hz  
GB 0  
PC 1.40

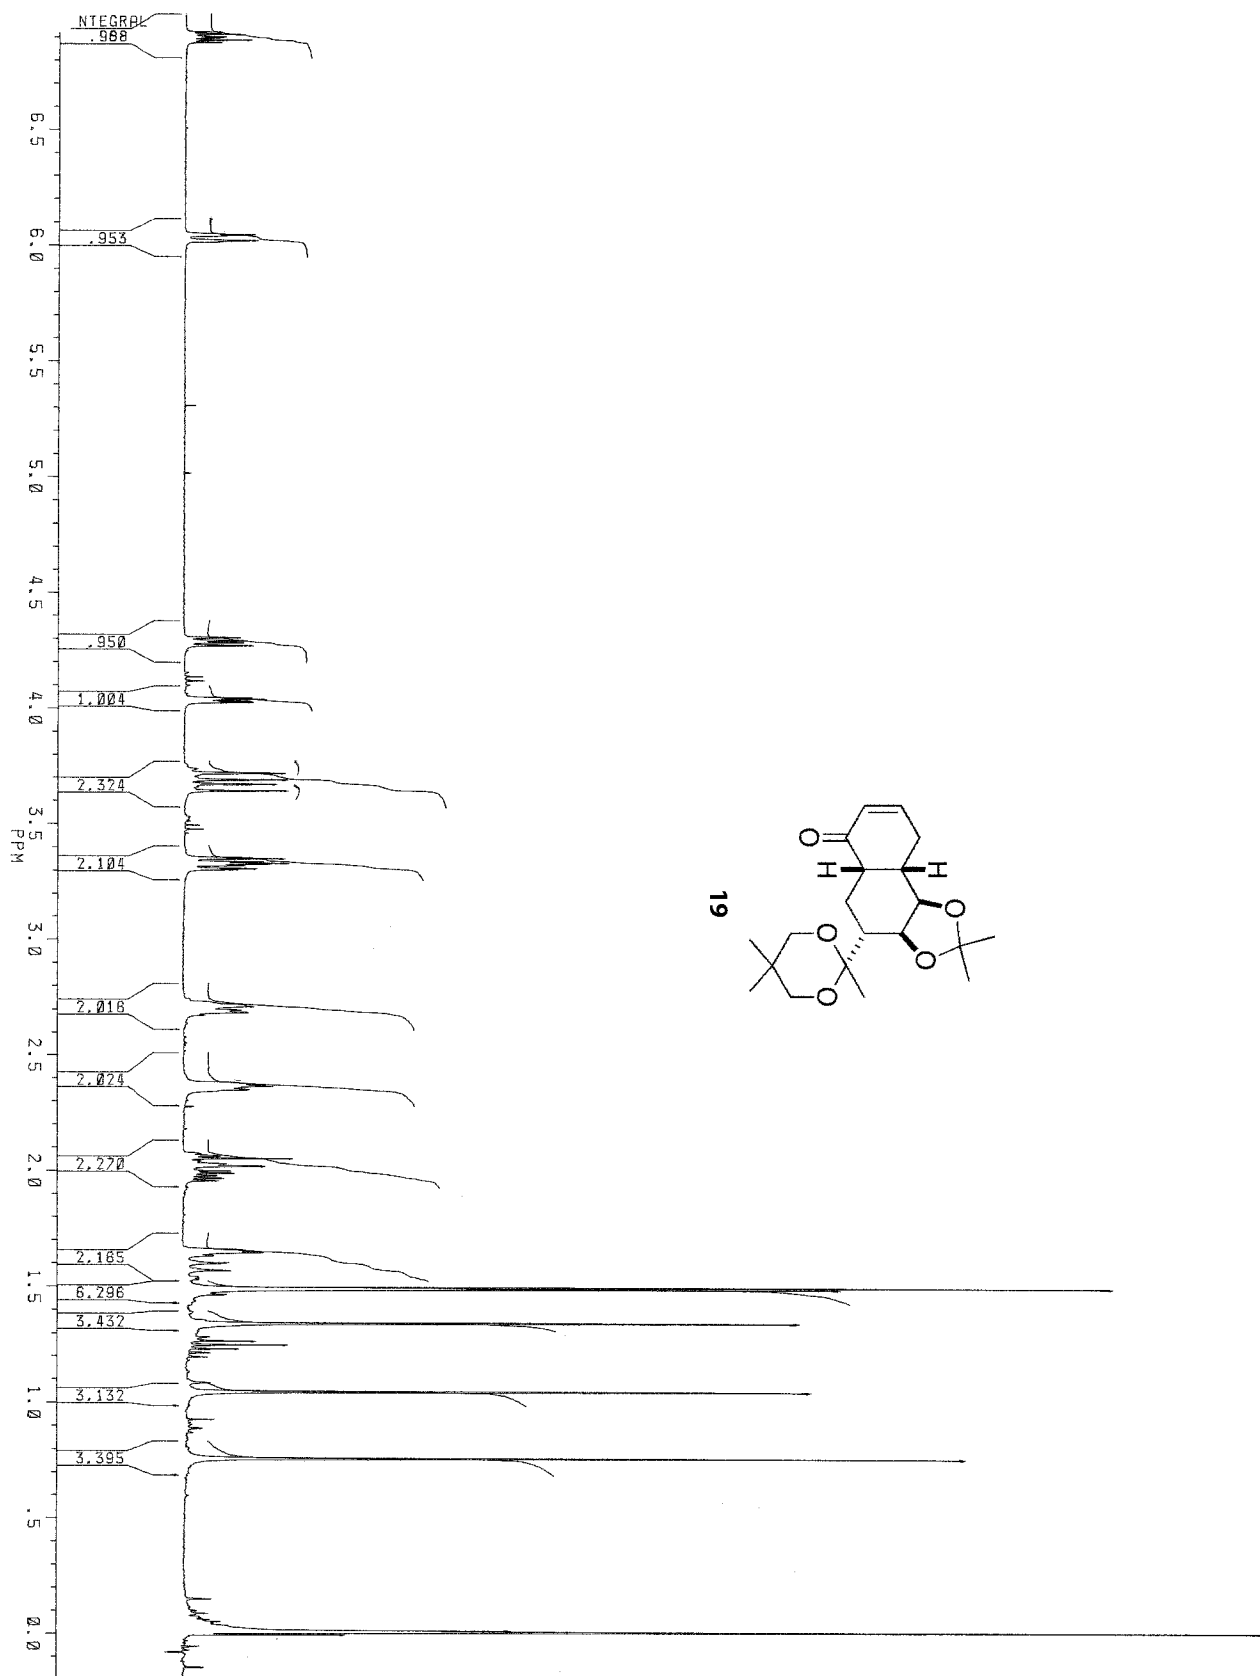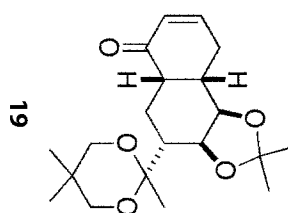

|               |        |             |    |          |    |       |
|---------------|--------|-------------|----|----------|----|-------|
| JD11108.101   | SE     | 400.134     | FW | 7600     | PM | 3.0   |
| DATE 29-10-88 | SY     | 74.85900000 | DP | 6000.000 | RG | 2.000 |
|               | 01     | 6400.000    |    |          | AG | 1.360 |
|               | SI     | 16584       |    |          | NS | 20    |
|               | TD     | 16584       |    |          | TE | 32    |
|               | SW     | 6024.095    |    |          |    | 297   |
|               | HZ/PT  | .735        |    |          |    |       |
|               | LB     | 0.0         |    |          |    |       |
|               | CX     | 0.0         |    |          |    |       |
|               | CT     | 35.00       |    |          |    |       |
|               | F1     | 0.0         |    |          |    |       |
|               | F2     | 2.000P      |    |          |    |       |
|               | HZ/CM  | -1.98P      |    |          |    |       |
|               | PPM/CM | 87.285      |    |          |    |       |
|               | SR     | .216        |    |          |    |       |
|               |        | 4930.99     |    |          |    |       |

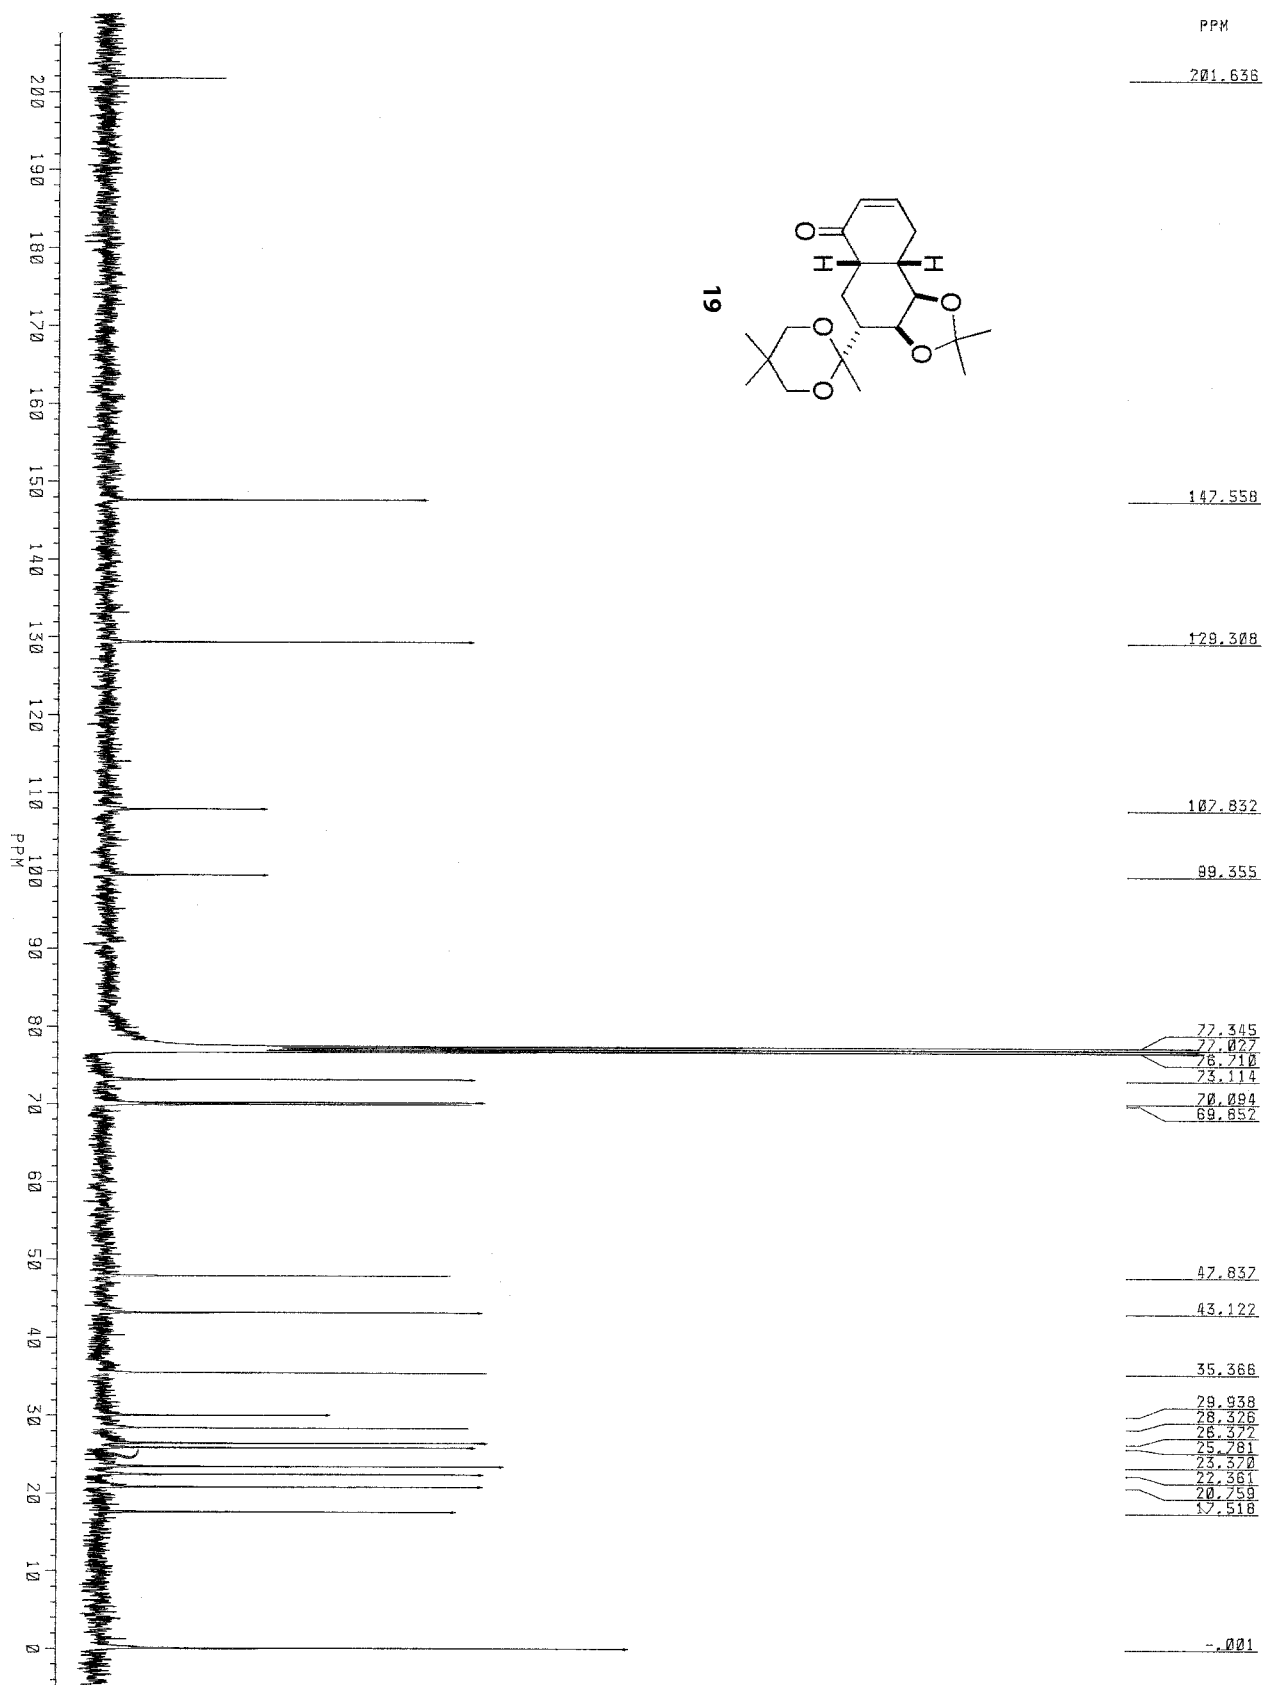

J011108.201  
 DATE 29-10-88  
 SF 100.614  
 ST 74.8900000  
 O1 34000.000  
 S1 65536  
 TD 65536  
 SW 25000.000  
 HZ/PT .763  
 PW 3.0  
 RD 0.0  
 RG 1.311  
 NS 400  
 TE 9069  
 297  
 FW 31300  
 DZ 6000.000  
 DP 15H BB  
 LB 3.000  
 GB 0.0  
 CX 33.00  
 CY 0.0  
 F1 209.899P  
 F2 -4.997P  
 HZ/CW 655.504  
 PPM/CW 6.515  
 SR 43868.93

RPM

77.3192  
77.0016  
76.7571  
76.6845

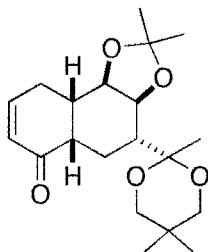

19

JDIII08.201  
DATE 29-10-88

SF 100.614  
SY 74.8900000  
Q1 54000.000  
SI 65536  
TD 65536  
SW 25000.000  
HZ/PT .763

PW 3.0  
RD 0.0  
AQ 1.311  
RG 400  
NS 9069  
TE 297

FW 31300  
Q2 6000.000  
DP 15H BB

LB 0.0  
GB 0.0  
CX 10.00  
CY 12.00  
F1 78.858P  
F2 74.740P  
HZ/CM 41.428  
PPM/CM .412  
SR 43871.60

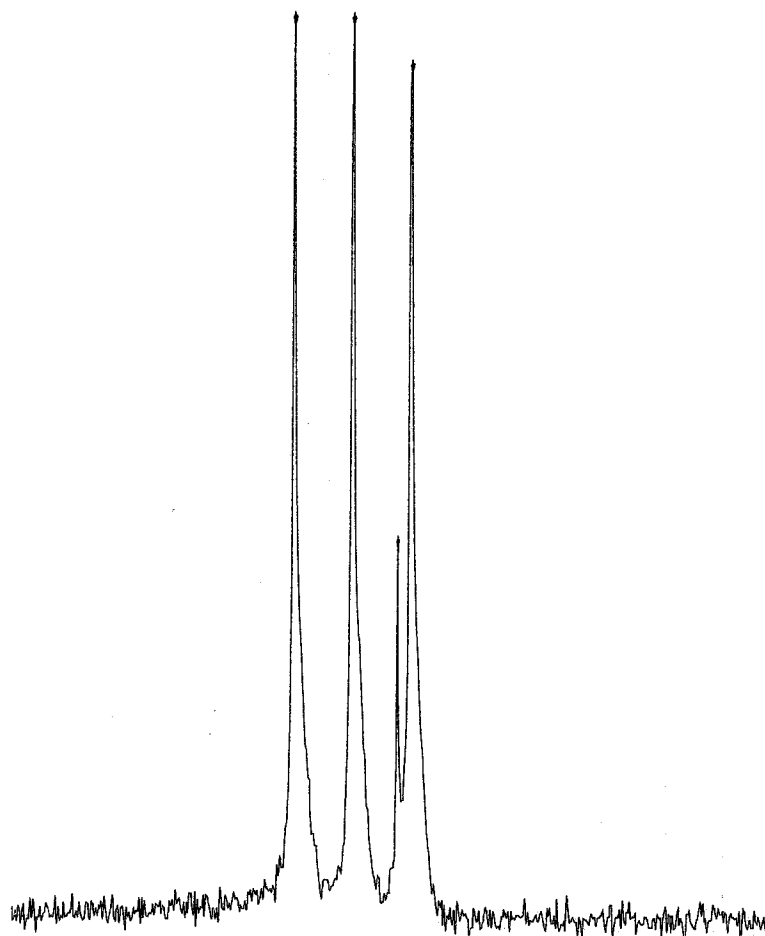

78

76

PPM

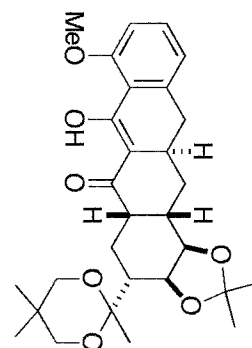

24

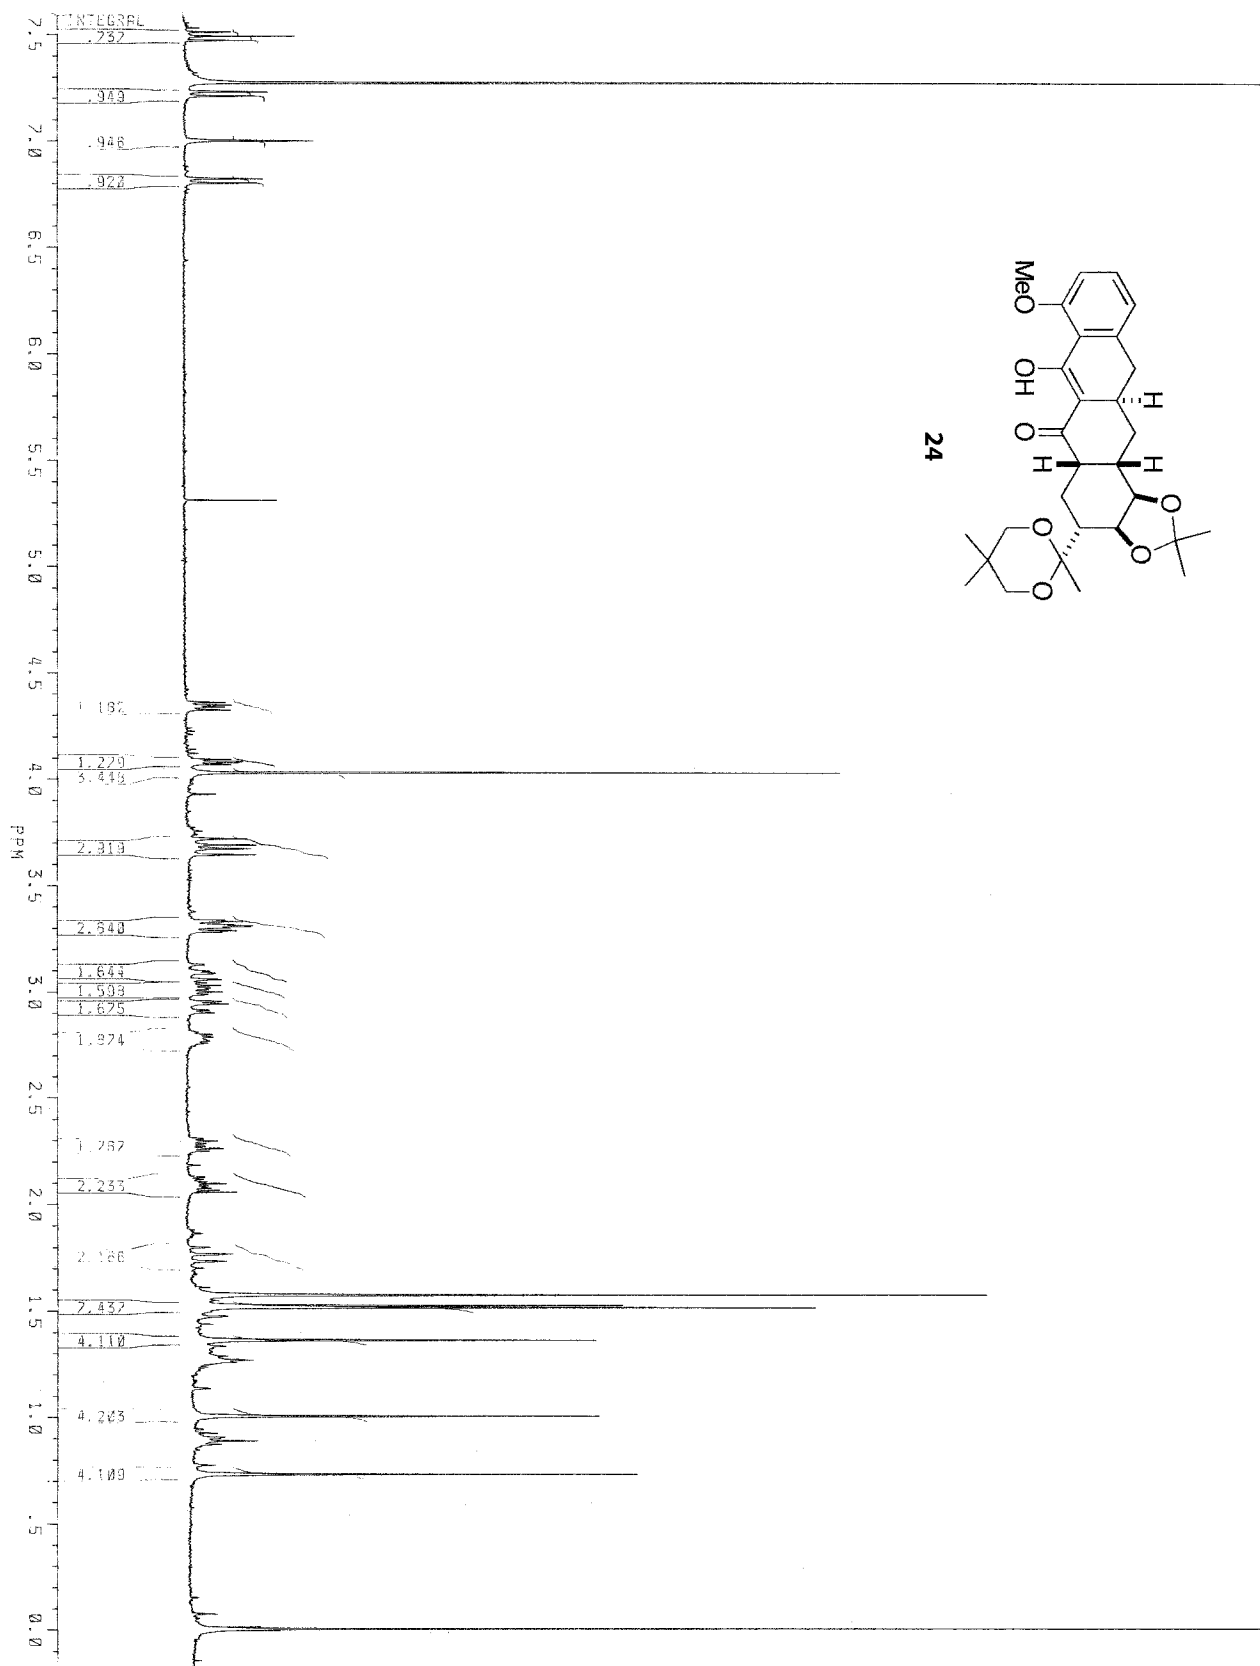

J01V024.201  
 D01E 1-5-89  
 SF 400.134  
 SY 74.8900000  
 O1 6400.000  
 SI 16384  
 TD 18384  
 SW 6024.096  
 HZ/PT 235  
 PW 3.0  
 RD 2.000  
 AD 1.350  
 RG 100  
 NS 100  
 TE 297  
 FW 7600  
 D2 6000.000  
 DP 15H P0  
 LB 0.0  
 GB 0.0  
 CX 33.00  
 CY 0.0  
 FI 2.601P  
 F2 -1.97P  
 HZ/CM 94.150  
 PPM/CM 4392.46  
 SR

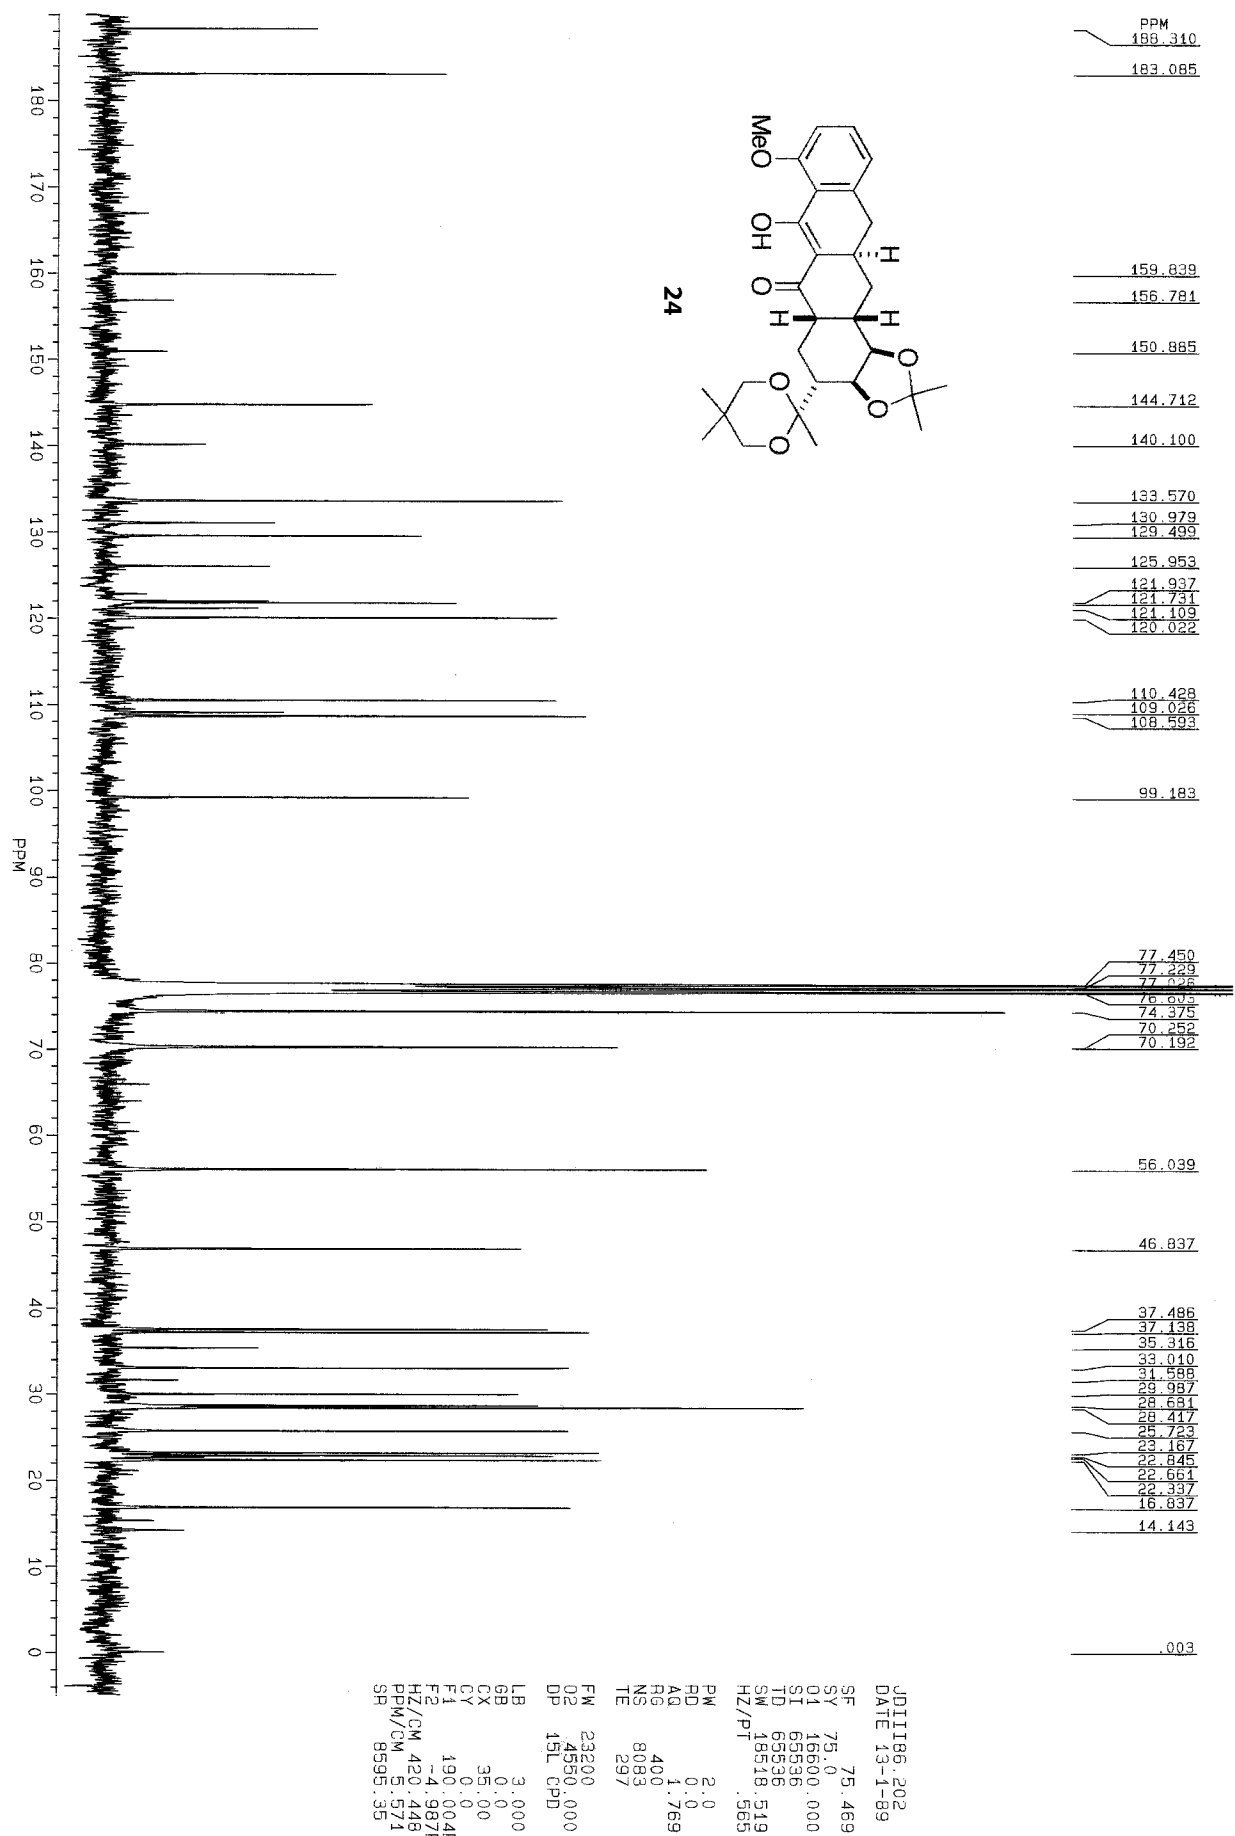

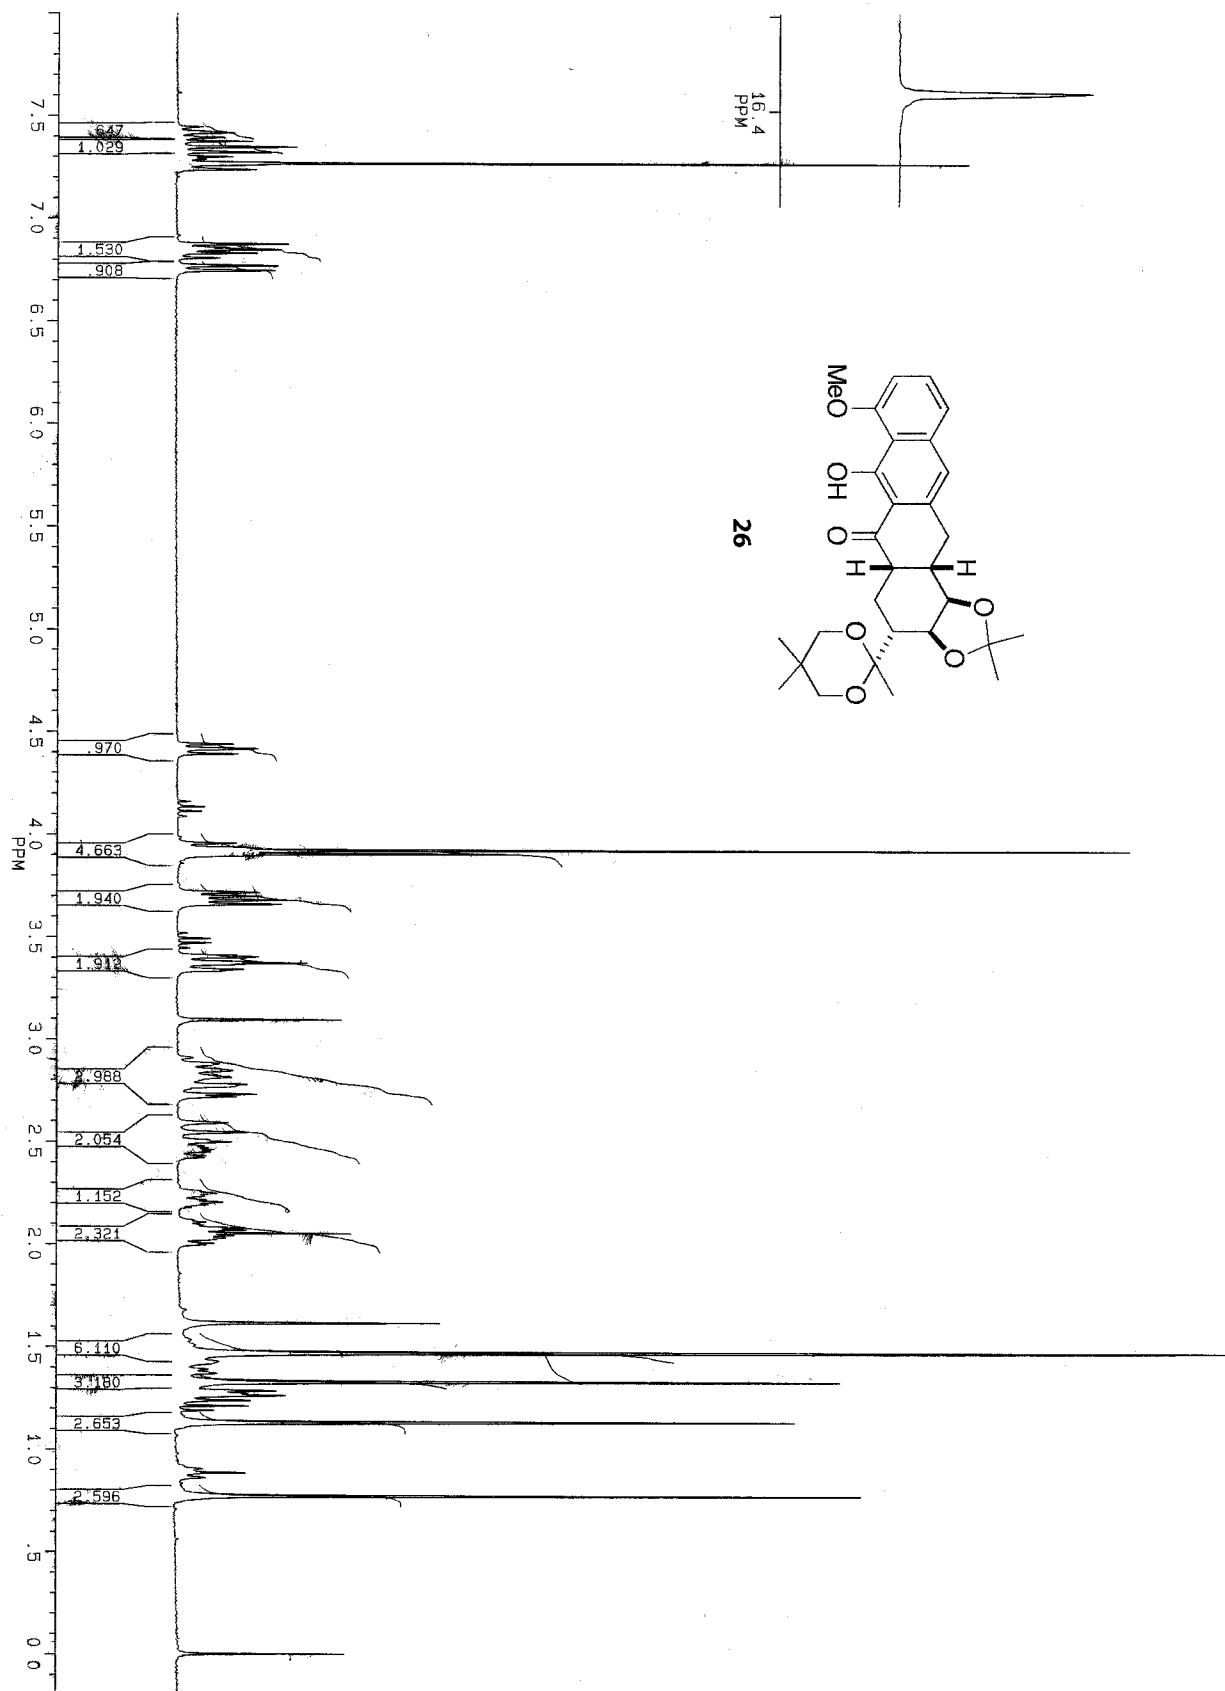

A.002  
 DATE 19-1-89  
 SF 300.133  
 SY 210.0  
 OI 8112.778  
 SI 16384  
 TD 16384  
 SW 6024.096  
 HZ/PT .735  
 PM 3.0  
 RD 2.000  
 AG 1.360  
 RG 4  
 NS 32  
 TE 297  
 FW 7600  
 OZ 3200.000  
 DP 63L PO  
 LB 0.0  
 GB 0.0  
 CX 35.00  
 CY 24.00  
 F1 8.000P  
 F2 196P  
 HZ/CM 70.280  
 PPM/CM 234  
 SR 3366.20

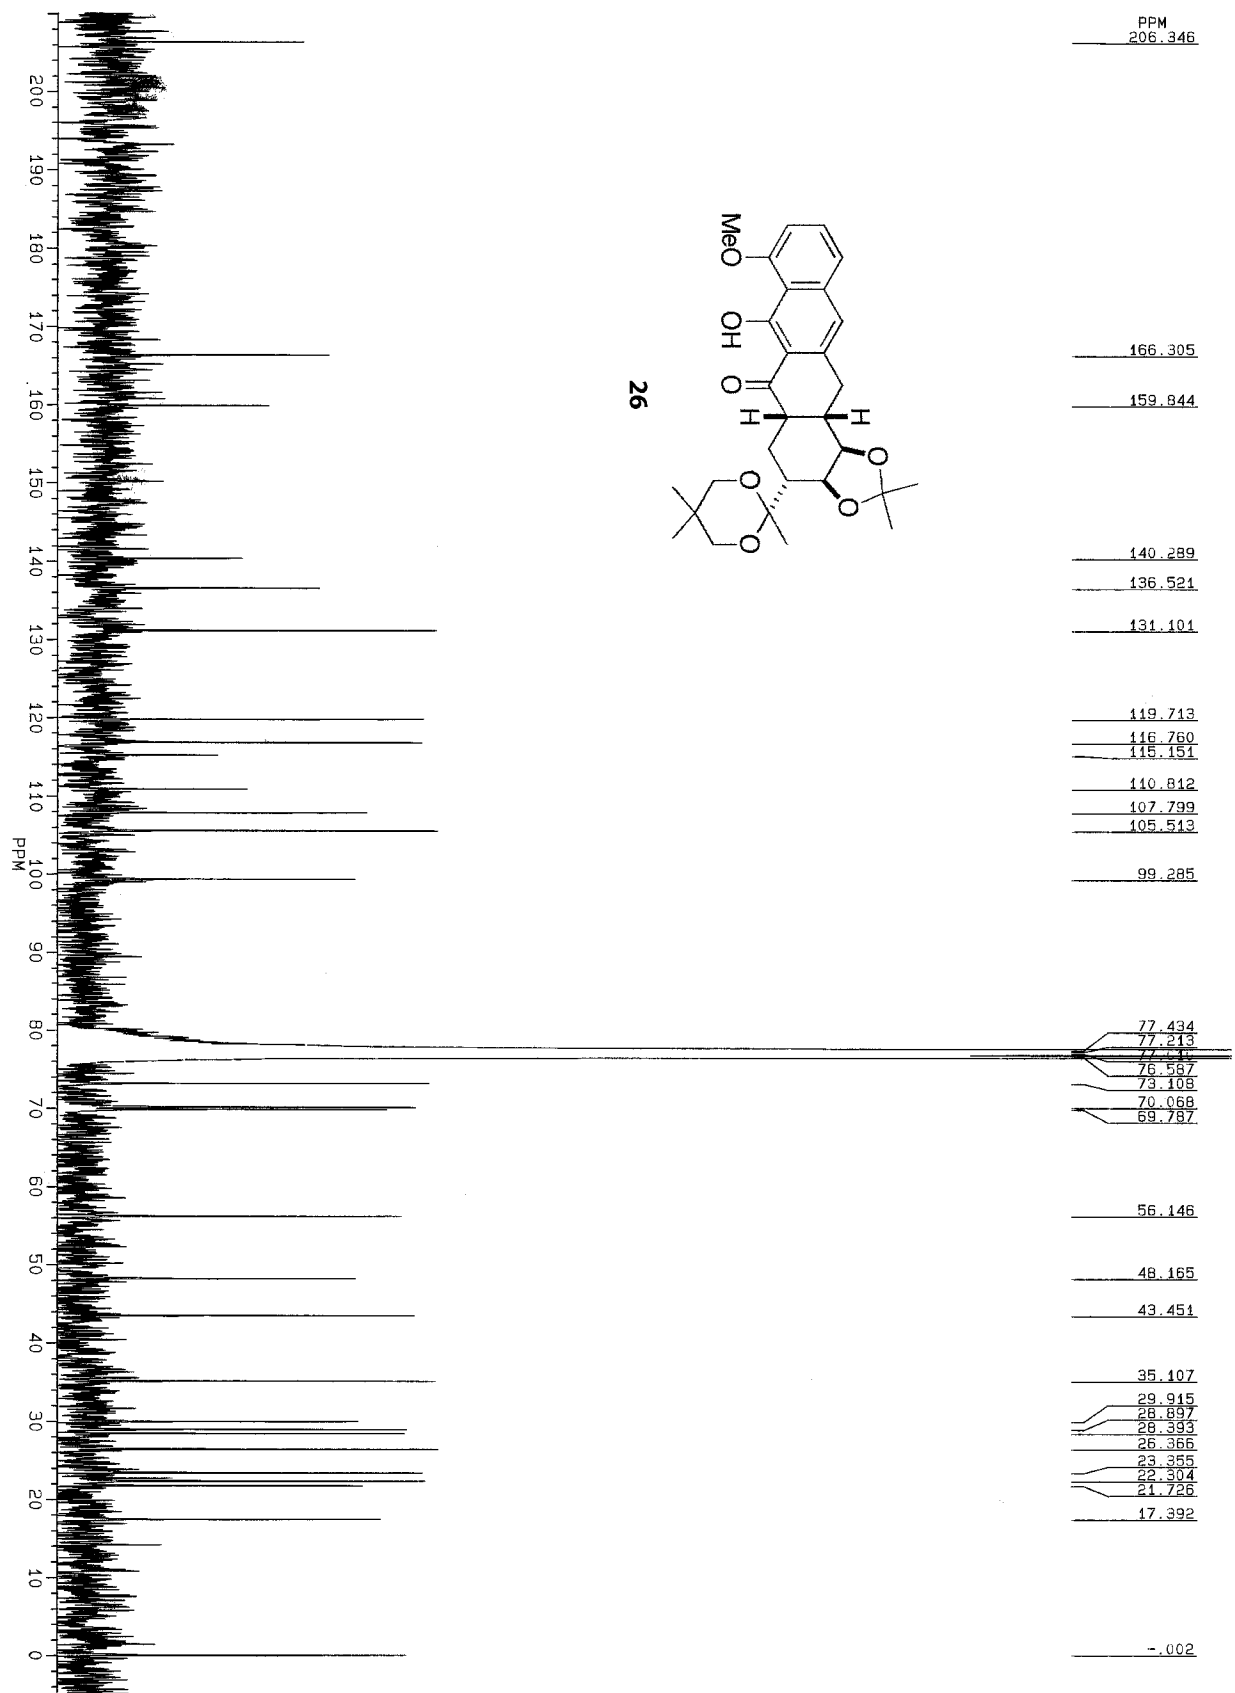

.JDIV004.201  
 DATE 20-2-09  
 SF 75.469  
 SY 75.0  
 O1 16600.000  
 SI 66536  
 TD 66536  
 SW 18518.519  
 HZ/PT .565  
 PW 2.0  
 RD 0.0  
 AQ 1.769  
 RG 400  
 NS 37291  
 TE 297  
 FW 23200  
 O2 4550.000  
 DP 15L.CPD  
 LB 3.000  
 GB 0.0  
 CX 35.00  
 CY 0.0  
 F1 210.005P  
 F2 -4.997P  
 HZ/CW 463.577  
 PPM/CW 6.143  
 SR 8595.35



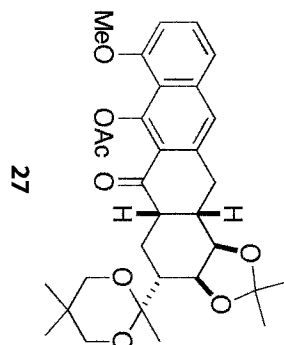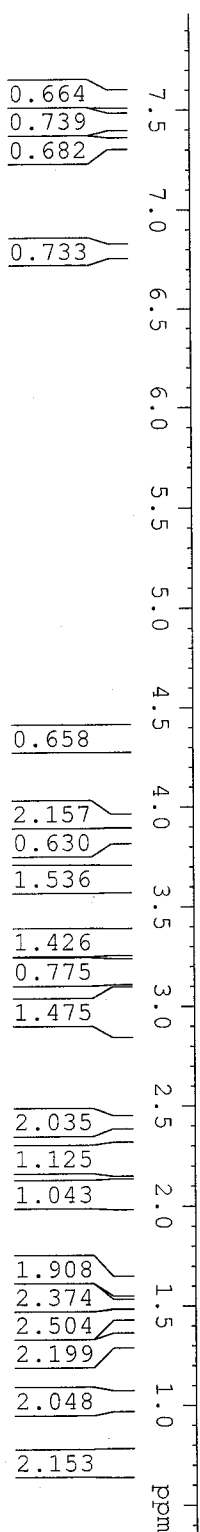

```

Current Data Parameters
NAME          gx354y.101
EXPNO         1
PROCNO        1
DU             /m
USER          qing

F2 - Acquisition Parameters
Date_         20030903
Time          21.37
INSTRUM       dpx300
PROBHD        5 mm QNP 1H
PULPROG       zg30
TD            32768
SOLVENT       CDCl3
NS            65
DS            2
SWH           4496.403 Hz
FIDRES       0.137219 Hz
AQ           3.6438515 sec
RG           574.7
DE           11.200 usec
TE           300.0 K
D1           1.50000000 sec

===== CHANNEL f1 =====
NUC1          1H
P1            8.20 usec
PL1          -3.00 dB
SFO1         300.131900 MHz

F2 - Processing parameters
SI           32768
SF          300.130063 MHz
WDW          EM
SSB          0
LB           0.30 Hz
GB           0
PC           1.00
  
```

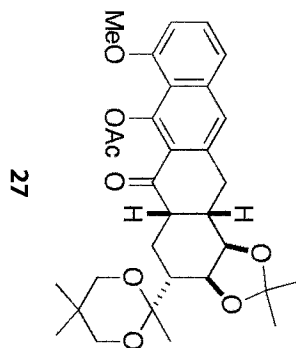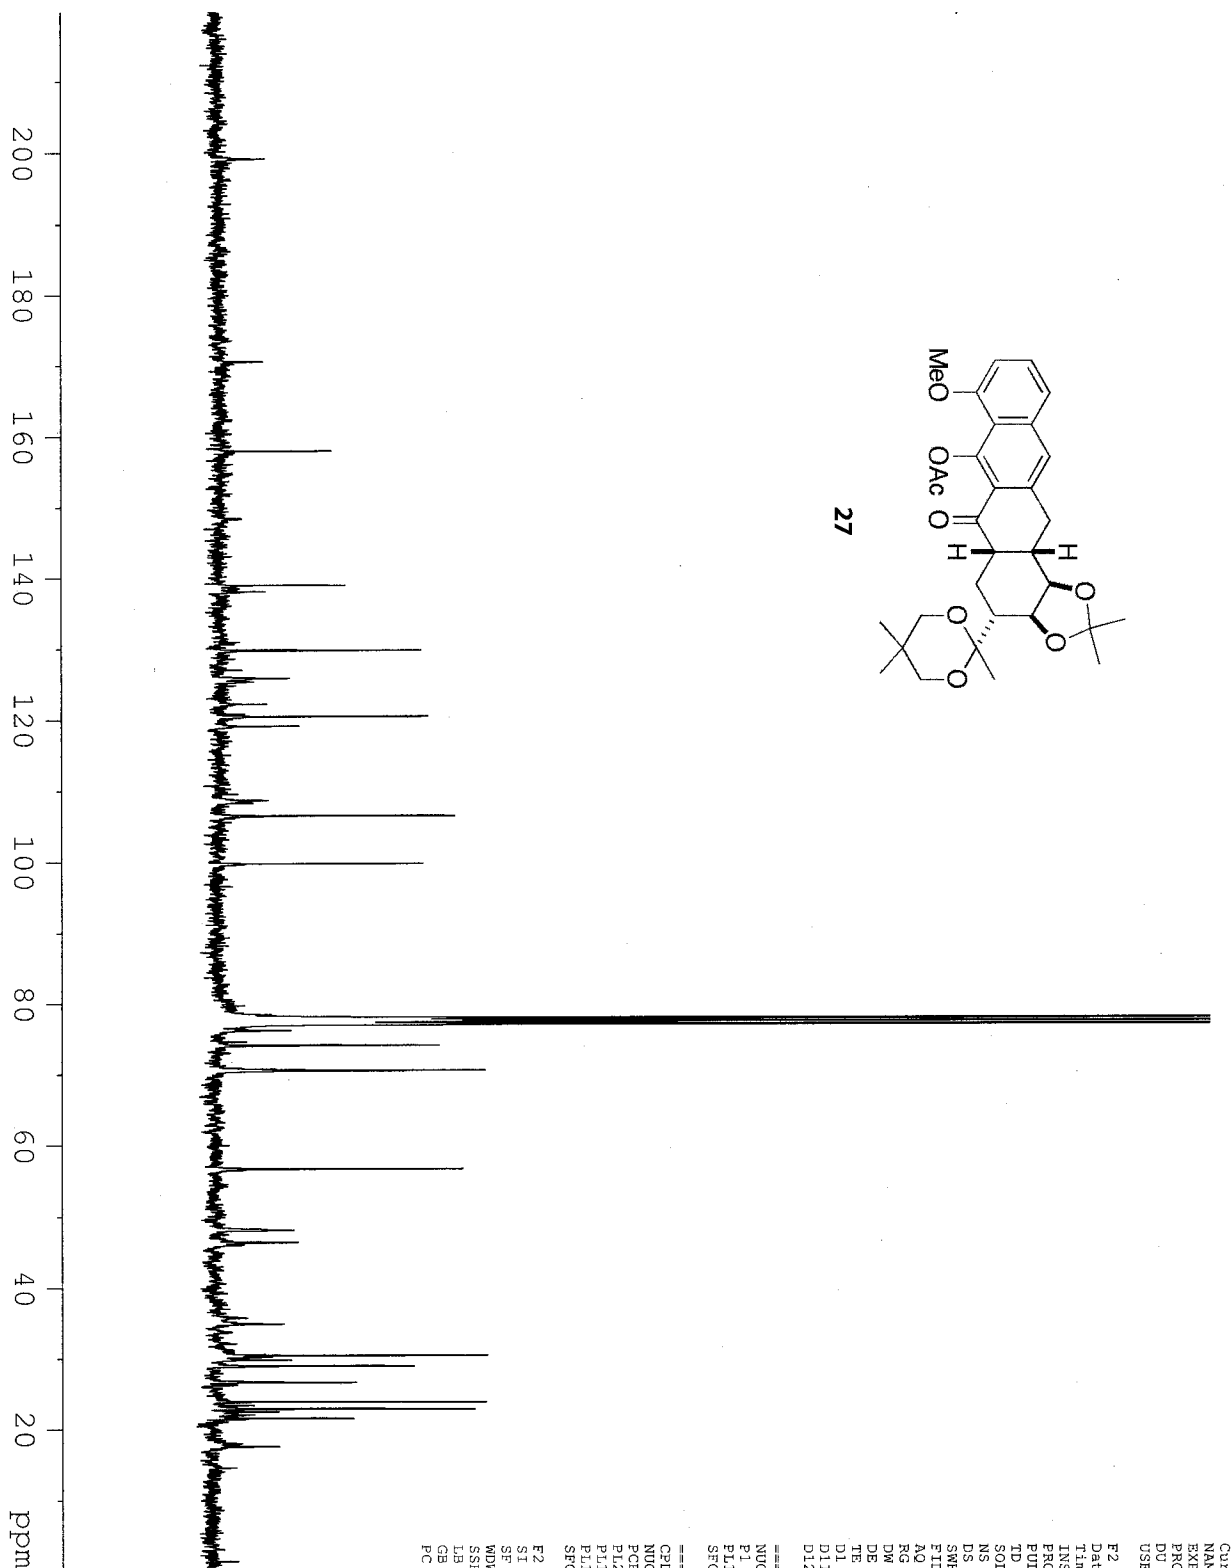

Current Data Parameters  
 NAME gx354y.101  
 EXPNO 2  
 PROCNO 1  
 DU /m  
 USER qing

F2 - Acquisition Parameters  
 Date\_ 20030903  
 Time 21.48  
 INSTRUM gp300  
 PROBHD 5 mm QNP 1H  
 PULPROG zgpg30  
 TD 65536  
 SOLVENT  
 NS 21388  
 DS 2  
 SMH 18832.393 Hz  
 FIDRES 0.287360 Hz  
 AQ 1.7400308 sec  
 RG 8192  
 DW 26.550 usec  
 DE 6.00 usec  
 TE 300.0 K  
 D1 0.00300000 sec  
 D11 0.03000000 sec  
 D12 0.0002000 sec

===== CHANNEL f1 =====  
 NUC1 13C  
 P1 7.60 usec  
 PL1 -3.00 dB  
 SFO1 75.4756431 MHz

===== CHANNEL f2 =====  
 CPDPRG2 waltz16  
 NUC2 1H  
 PCPD2 80.00 usec  
 PL2 2.00 dB  
 PL12 17.55 dB  
 PL13 19.00 dB  
 SFO2 300.1315007 MHz

F2 - Processing Parameters  
 SI 131072  
 SF 75.4677190 MHz  
 WDW EM  
 SSB 0  
 LB 3.00 Hz  
 GB 0  
 PC 1.40

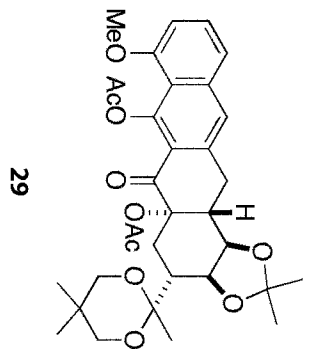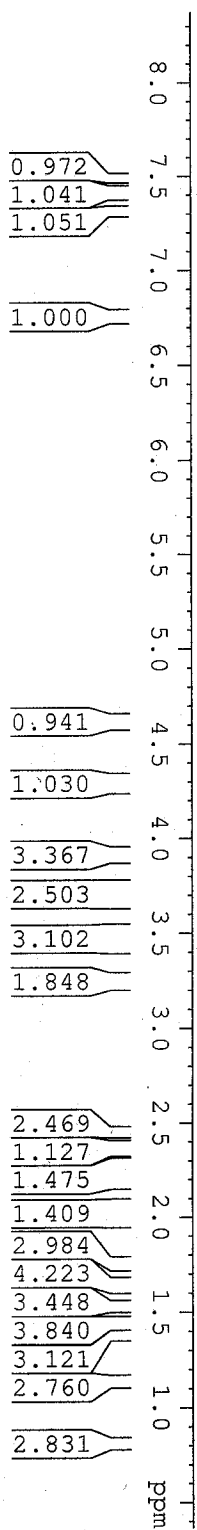

Current Data Parameters  
 NAME qx35w.101  
 EXPNO 1  
 PROCNO 1  
 DU 1  
 USER gmg

F2 - Acquisition Parameters  
 Date\_ 20030908  
 Time 22.12  
 INSTRUM dpx300  
 PROBD 5 mm QNP 1H  
 PULPROG zg30  
 TD 32768  
 SOLVENT 100  
 NS 2  
 DS 4496.403 Hz  
 SMH 0.137219 Hz  
 FIDRES 3.6438515 sec  
 AQ 574.7  
 RG 111.200 usec  
 DW 6.00 usec  
 DE 300.0 K  
 TE 1.50000000 sec  
 D1

===== CHANNEL f1 =====  
 NUC1 1H  
 P1 8.20 usec  
 PL1 -3.00 dB  
 SFO1 300.1319000 MHz

F2 - Processing Parameters  
 SI 32768  
 SF 300.130063 MHz  
 WDW EM  
 SSB 0  
 GB 0  
 PC 1.40

192.360  
170.951  
169.979  
157.299  
138.282  
137.874  
129.271  
125.148  
122.973  
120.277  
118.886  
109.421  
105.961  
99.632

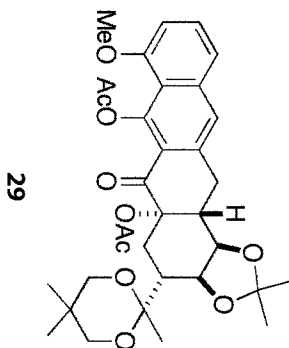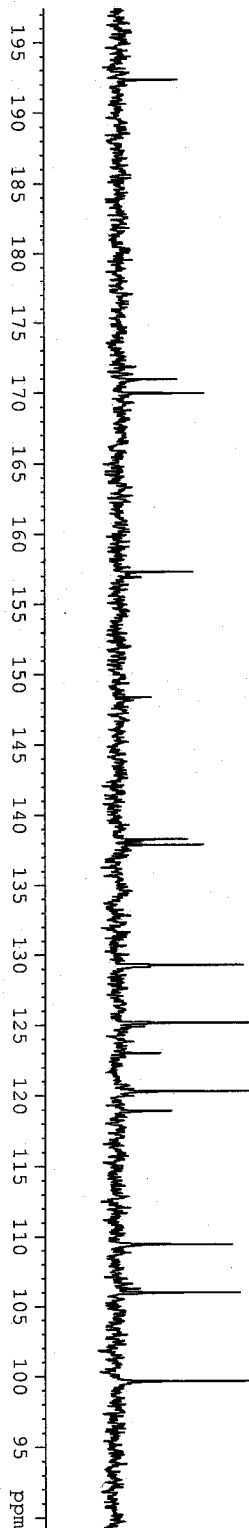

Current Data Parameters  
NAME qx358w.101  
EXPNO 2  
PROCNO 1  
DU /m  
USER qing

F2 - Acquisition Parameters  
Date\_ 20030908  
Time 22.26  
INSTRUM dpx300  
PROBHD 5 mm QNP 1H  
PULPROG zgpg30  
TD 65536  
SOLVENT  
NS 20084  
DS 2  
SWH 18832.393 Hz  
FIDRES 0.287360 Hz  
AQ 1.7400308 sec  
RG 8192  
DW 26.550 usec  
DE 6.00 usec  
TE 300.0 K  
D1 0.00300000 sec  
D11 0.03000000 sec  
D12 0.0002000 sec

CHANNEL f1  
NUC1 13C  
P1 7.60 usec  
PL1 -3.00 dB  
SFO1 75.4756431 MHz

CHANNEL f2  
CPDPRG2 waltz16  
NUC2 1H  
PCPD2 80.00 usec  
PL2 2.00 dB  
PL12 17.55 dB  
PL13 19.00 dB  
SFO2 300.1315007 MHz

F2 - Processing Parameters  
SI 131072  
SF 75.4677190 MHz  
WDW EM  
SSB 0  
LB 3.00 Hz  
GB 0  
PC 1.40

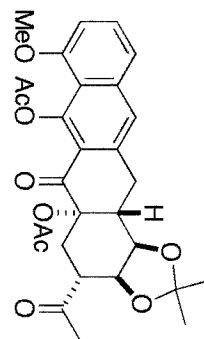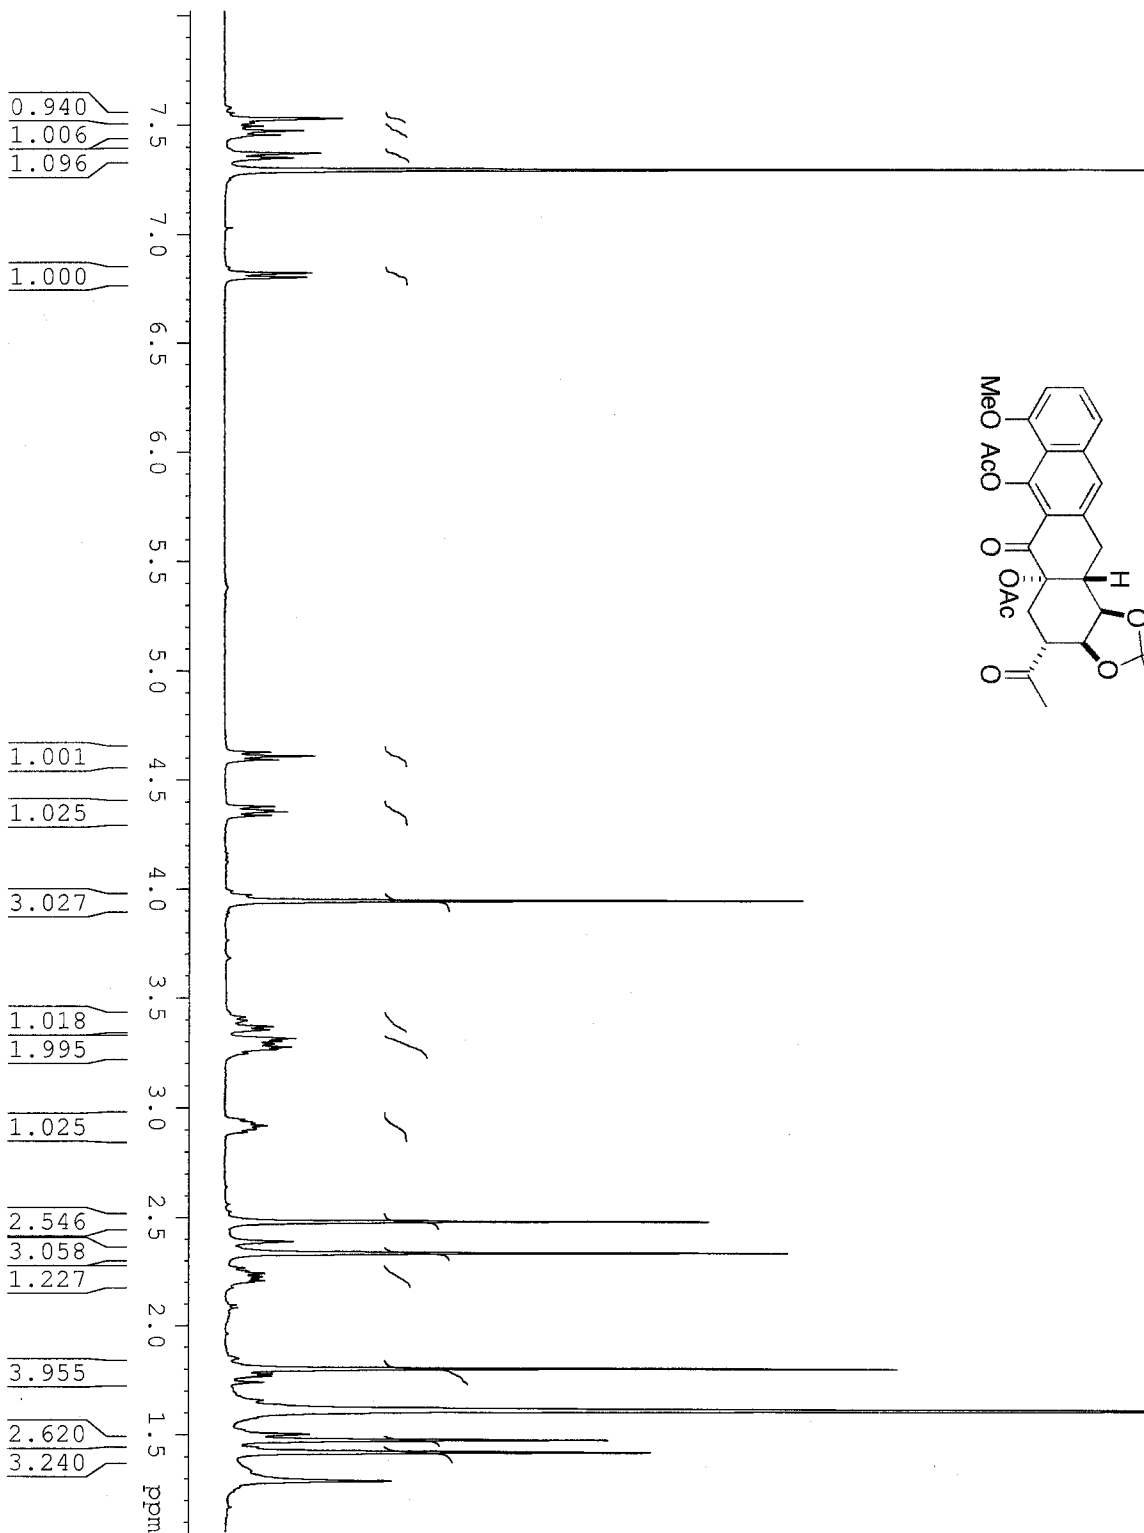

Current Data Parameters  
 NAME gx359w.101  
 EXPNO 1  
 PROCNO 1  
 DT 1  
 USER qing

F2 - Acquisition Parameters  
 Date\_ 20030910  
 Time 22:41  
 INSTRUM spect  
 PROBHD 5 mm BBO 400  
 PULPROG zgpg30  
 SOLVENT CDCl3  
 NS 100  
 DS 2  
 SWH 5995.204 Hz  
 FIDRES 0.182859 Hz  
 AQ 2.732611 sec  
 RG 31494  
 IN 83.400 usec  
 DE 300.0 K  
 TE 300.0 K  
 D1 2.00000000 sec

===== CHANNEL f1 =====  
 NUC1 1H  
 P1 11.30 usec  
 PL1 0.00 dB  
 SFO1 400.0126001 MHz

F2 - Processing parameters  
 SI 65536  
 SF 400.0100000 MHz  
 MDW 0  
 SSB 0  
 LB 0.70 Hz  
 GB 0  
 PC 1.00

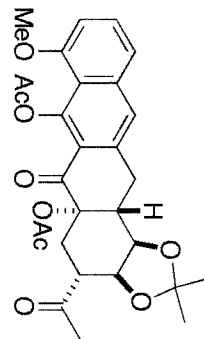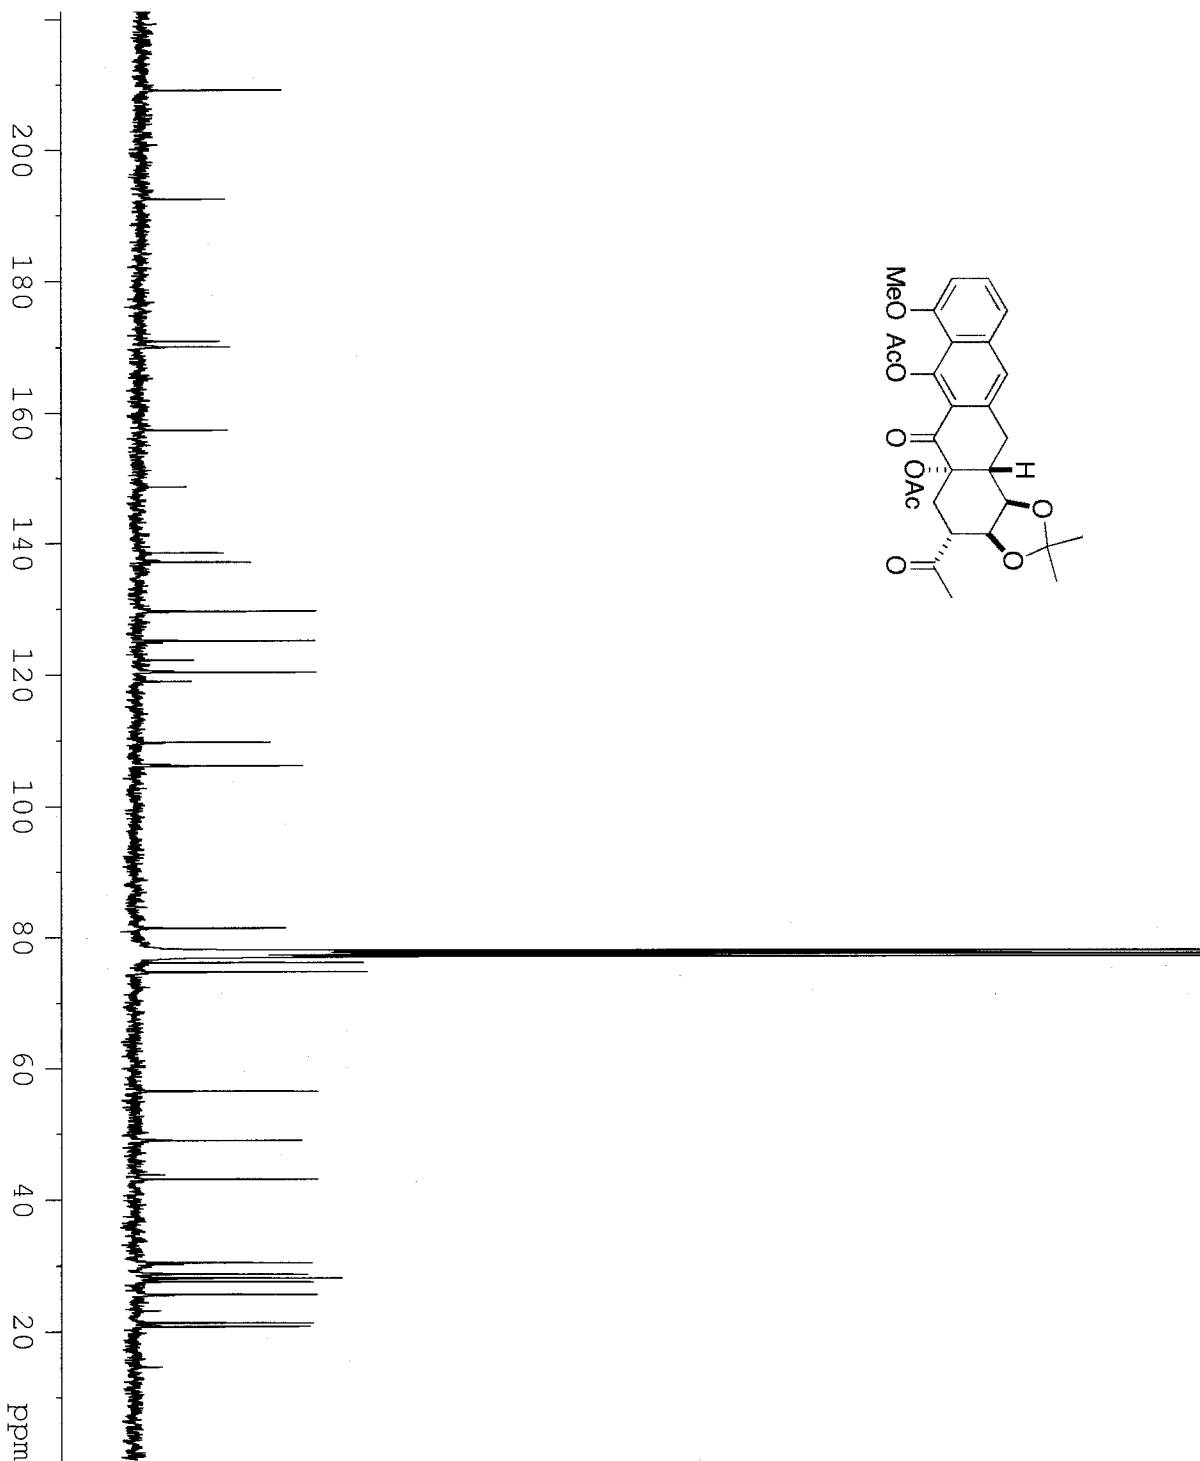

Current Data Parameters  
 NAME qx366y.101  
 EXPNO 2  
 PROCNO 1  
 DU /m  
 USER qing

F2 - Acquisition Parameters  
 Date\_ 20031004  
 Time 8:00  
 INSTRUM dpx300  
 PROBHD 5 mm QNP 1H  
 PULPROG zgpg30  
 TD 65536  
 SOLVENT  
 NS 20000  
 DS 2  
 SWH 18832.393 Hz  
 FIDRES 0.287360 Hz  
 AQ 1.7400308 sec  
 RG 8192  
 DW 26.550 usec  
 DE 6.00 usec  
 TE 300.0 K  
 D1 0.00300000 sec  
 D11 0.03000000 sec  
 D12 0.00002000 sec

===== CHANNEL f1 =====  
 NUC1 <sup>13</sup>C  
 P1 7.60 usec  
 PL1 -3.00 dB  
 SFO1 75.4756431 MHz

===== CHANNEL f2 =====  
 CPDPRG2 waltz16  
 NUC2 <sup>1</sup>H  
 PCPD2 80.00 usec  
 PL2 2.00 dB  
 PL12 17.55 dB  
 PL13 19.00 dB  
 SFO2 300.1315007 MHz

F2 - Processing Parameters  
 SI 131072  
 SF 75.4677190 MHz  
 WDM EM  
 SSB 0  
 LB 3.00 Hz  
 GB 0  
 PC 1.40

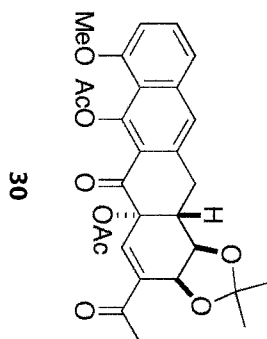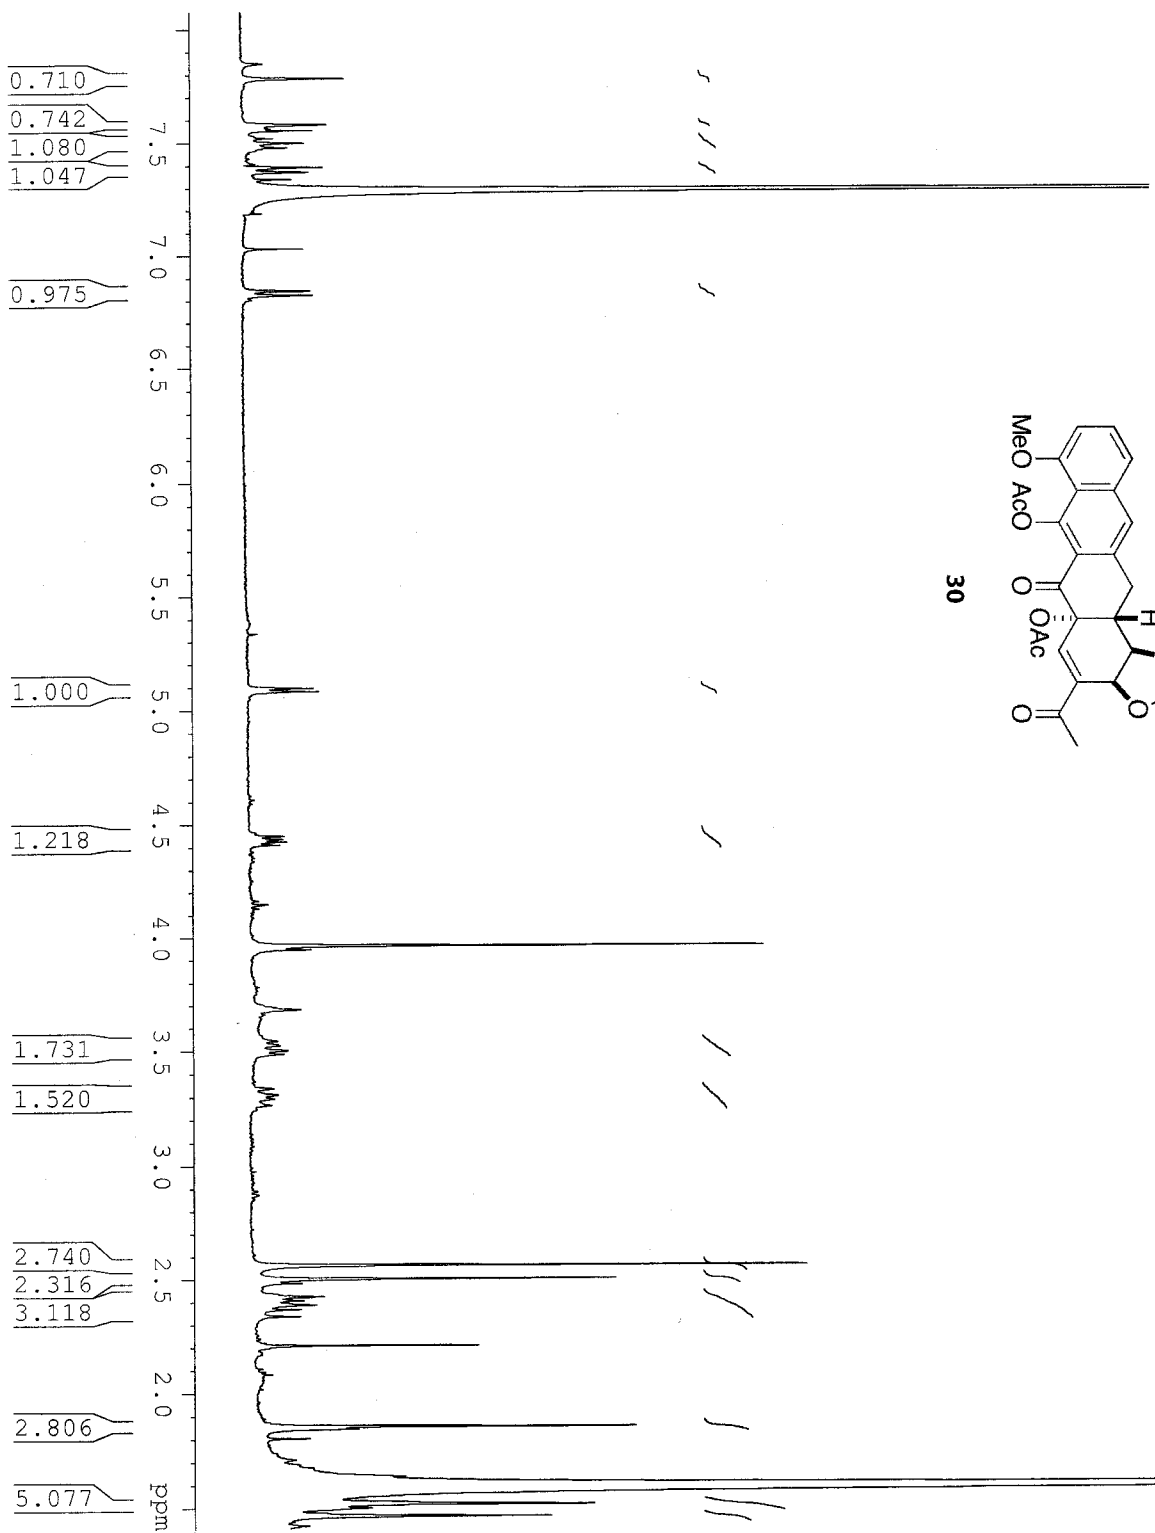

Current Data Parameters  
 NAME qx361w.101  
 EXPNO 2  
 PROCNO 1  
 DU /m  
 USER qing

F2 - Acquisition Parameters  
 Date\_ 20030915  
 Time 12.07  
 INSTRUM dpx400  
 PROBHD 5 mm BBO 2-G  
 PULPROG zg30  
 TD 32768  
 SOLVENT CDCl3  
 NS 1357  
 DS 2  
 SWH 5995.204 Hz  
 FIDRES 0.182959 Hz  
 AQ 2.7329011 sec  
 RG 1149.4  
 DW 83.400 usec  
 DE 6.00 usec  
 TE 300.0 K  
 D1 2.00000000 sec

===== CHANNEL f1 =====  
 NUC1 1H  
 P1 11.30 usec  
 PL1 0.00 dB  
 SFO1 400.0126001 MHz

F2 - Processing parameters  
 SI 65536  
 SF 400.010000 MHz  
 WDW EM  
 SSB 0  
 LB 0.70 Hz  
 GB 0  
 PC 1.00

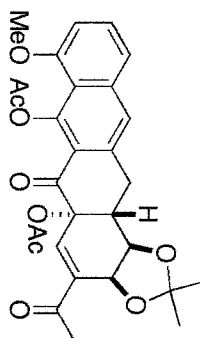

30

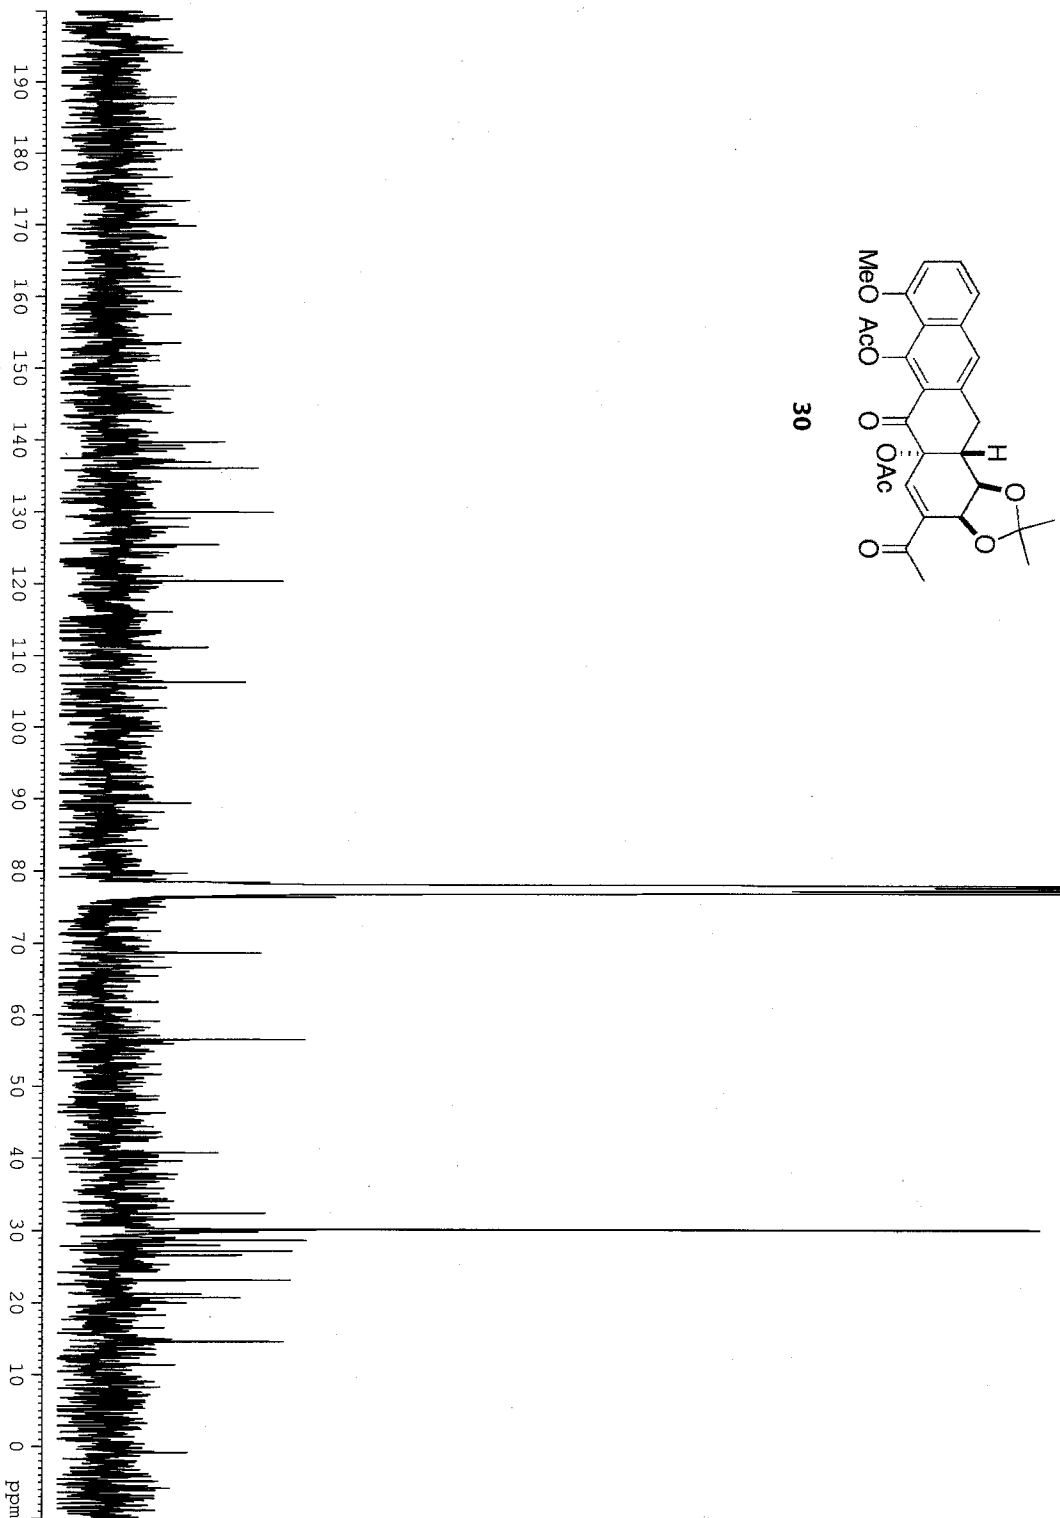

Current Data Parameters  
NAME gx558w.101  
EXPNO 3  
PROCNO 1  
DU 1  
USER qing

F2 - Acquisition Parameters  
Date\_ 20040711  
Time 8:11  
INSTRUM dpx300  
PROBHD 5 mm QNP 1H  
PULPROG zgpg30  
TD 65536  
SOLVENT 21000  
DS 2  
SMH 18932.393 Hz  
FIDRES 0.267360 Hz  
AQ 1.740308 sec  
RG 65536  
Dw 26.550 usec  
DE 300.0 K  
TE 300.0 K  
D1 0.00300000 sec  
D11 0.03000000 sec  
D12 0.00002000 sec

CHANNEL F1  
NUC1 13C  
P1 7.60 usec  
PL1 -3.00 dB  
SFO1 75.4756431 MHz

CHANNEL F2  
CPDPRG2 waltz16  
NUC2 1H  
PCPD2 80.00 usec  
PL2 2.00 dB  
PL12 17.55 dB  
PL13 19.00 dB  
SFO2 300.1315007 MHz  
F2 - Processing Parameters  
SI 131072  
SF 75.4677190 MHz  
WDW PM  
SSB 0  
LB 3.00 Hz  
GB 0  
PC 1.00



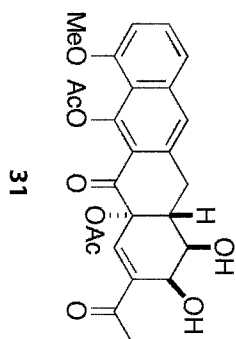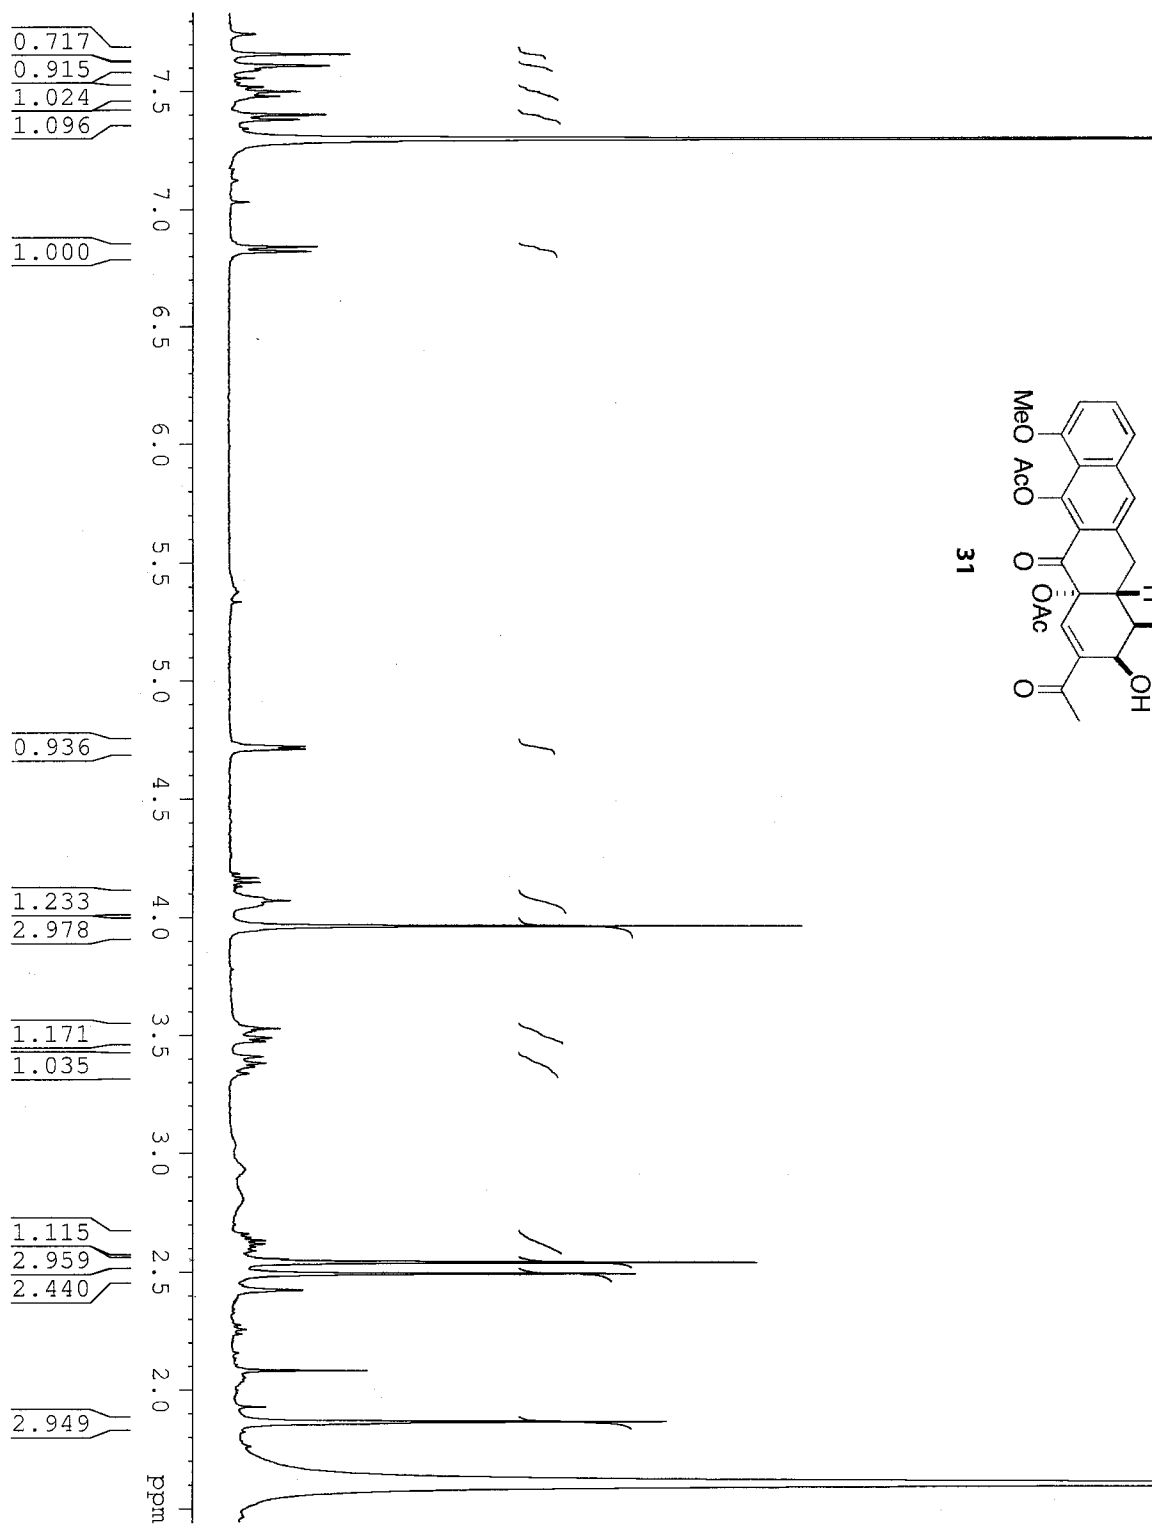

Current Data Parameters  
 NAME: gx350w.101  
 EXPNO: 1  
 PROCNO: 1  
 DU: 1  
 USER: gmg

F2 - Acquisition Parameters  
 Date\_: 20040713  
 Time: 20.01  
 INSTRUM: dpx400  
 PROBHD: 5 mm BBO Z-G  
 PULPROG: zg30  
 TD: 32768  
 SOLVENT: CDCl3  
 NS: 505  
 DS: 2  
 SWH: 5995.204 Hz  
 FIDRES: 0.182859 Hz  
 AQ: 2.7329011 sec  
 RG: 2580.3  
 DW: 83.400 usec  
 DE: 6.00 usec  
 TE: 300.0 K  
 D1: 2.00000000 sec

===== CHANNEL f1 =====  
 NUCL: 1H  
 P1: 11.30 usec  
 PL1: 0.00 dB  
 SFO1: 400.0126001 MHz

F2 - Processing parameters  
 SI: 65536  
 SF: 400.0100000 MHz  
 WDW: EM  
 SSB: 0  
 LB: 0.70 Hz  
 GB: 0  
 PC: 1.00

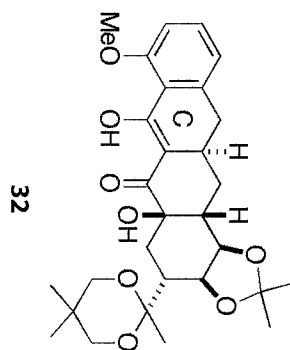

S58

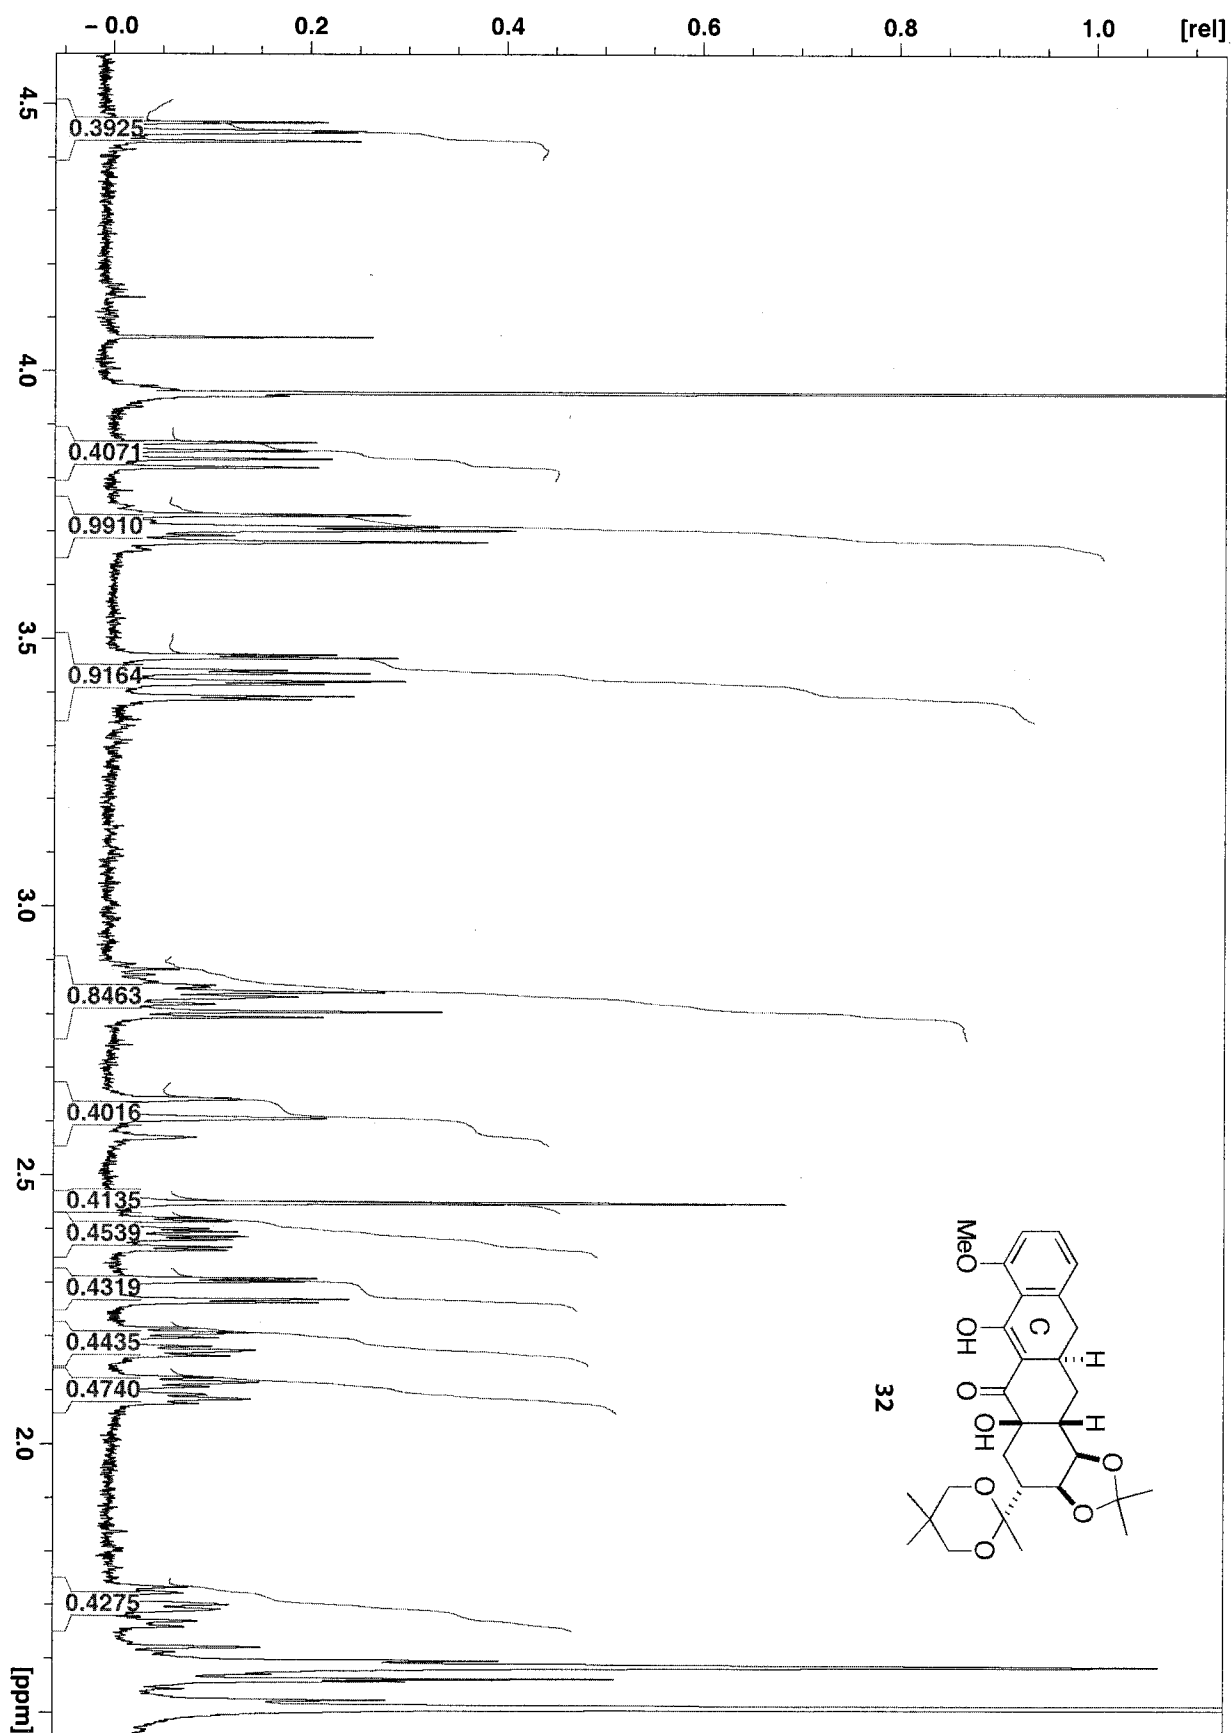

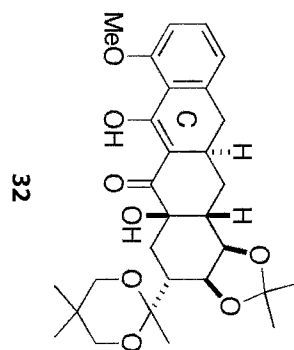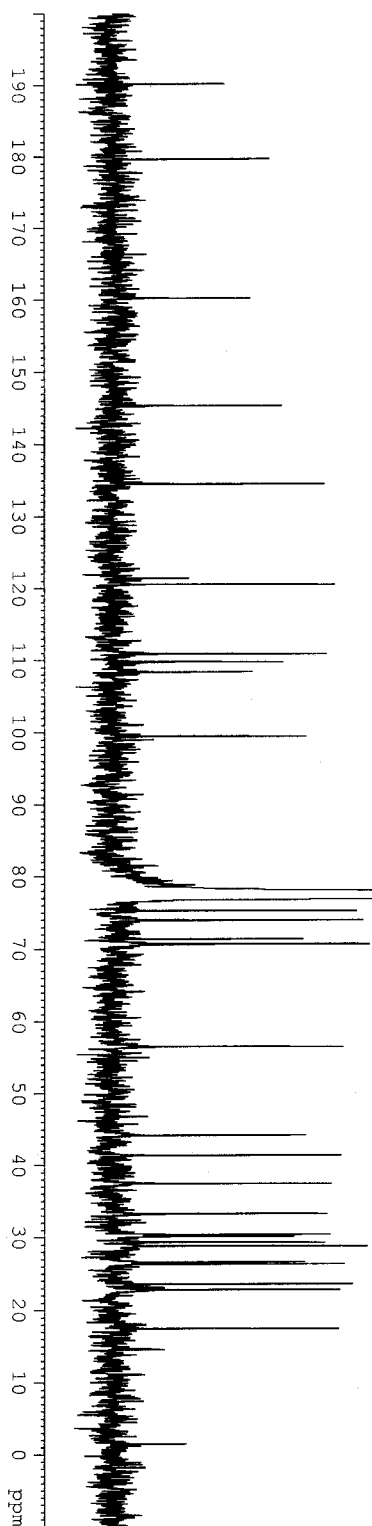

Current Data Parameters  
 NAME gk318y.101  
 EXPNO 2  
 PROCNO 1  
 DU /m  
 USER qing

F2 - Acquisition Parameters  
 Date\_ 20080517  
 Time 22:28  
 INSTRUM dpx300  
 PROBRD 5 mm QNP 1H  
 FIDPRG 2928  
 ID 32768  
 SOLVENT 32  
 NS 4  
 DS 2  
 SWH 4496.409 Hz  
 FIDRES 0.137219 Hz  
 AQ 3.6438213 sec  
 RG 406.4  
 DM 111.200 usec  
 DE 300.0 usec  
 TE 300.0 K  
 D1 1.50000000 sec

===== CHANNEL f1 =====  
 NUC1 1H  
 P1 8.20 usec  
 PL1 -3.00 dB  
 SFO1 300.1319000 MHz

F2 - Processing parameters  
 SI 32768  
 SF 300.130069 MHz  
 WDW EM  
 SSB 0  
 GB 0  
 CB 0  
 FC 1.00

1D NMR plot parameters  
 CX 20.00 cm  
 F1P 7.472 ppm  
 F1 2242.52 Hz  
 F2P 4.635 ppm  
 F2 1409.14 Hz  
 PPMCM 0.13884 ppm/cm  
 HZCM 41.66925 Hz/cm

34

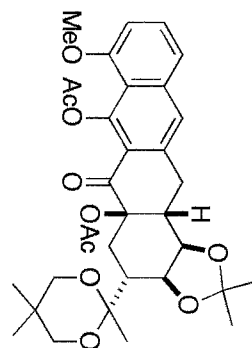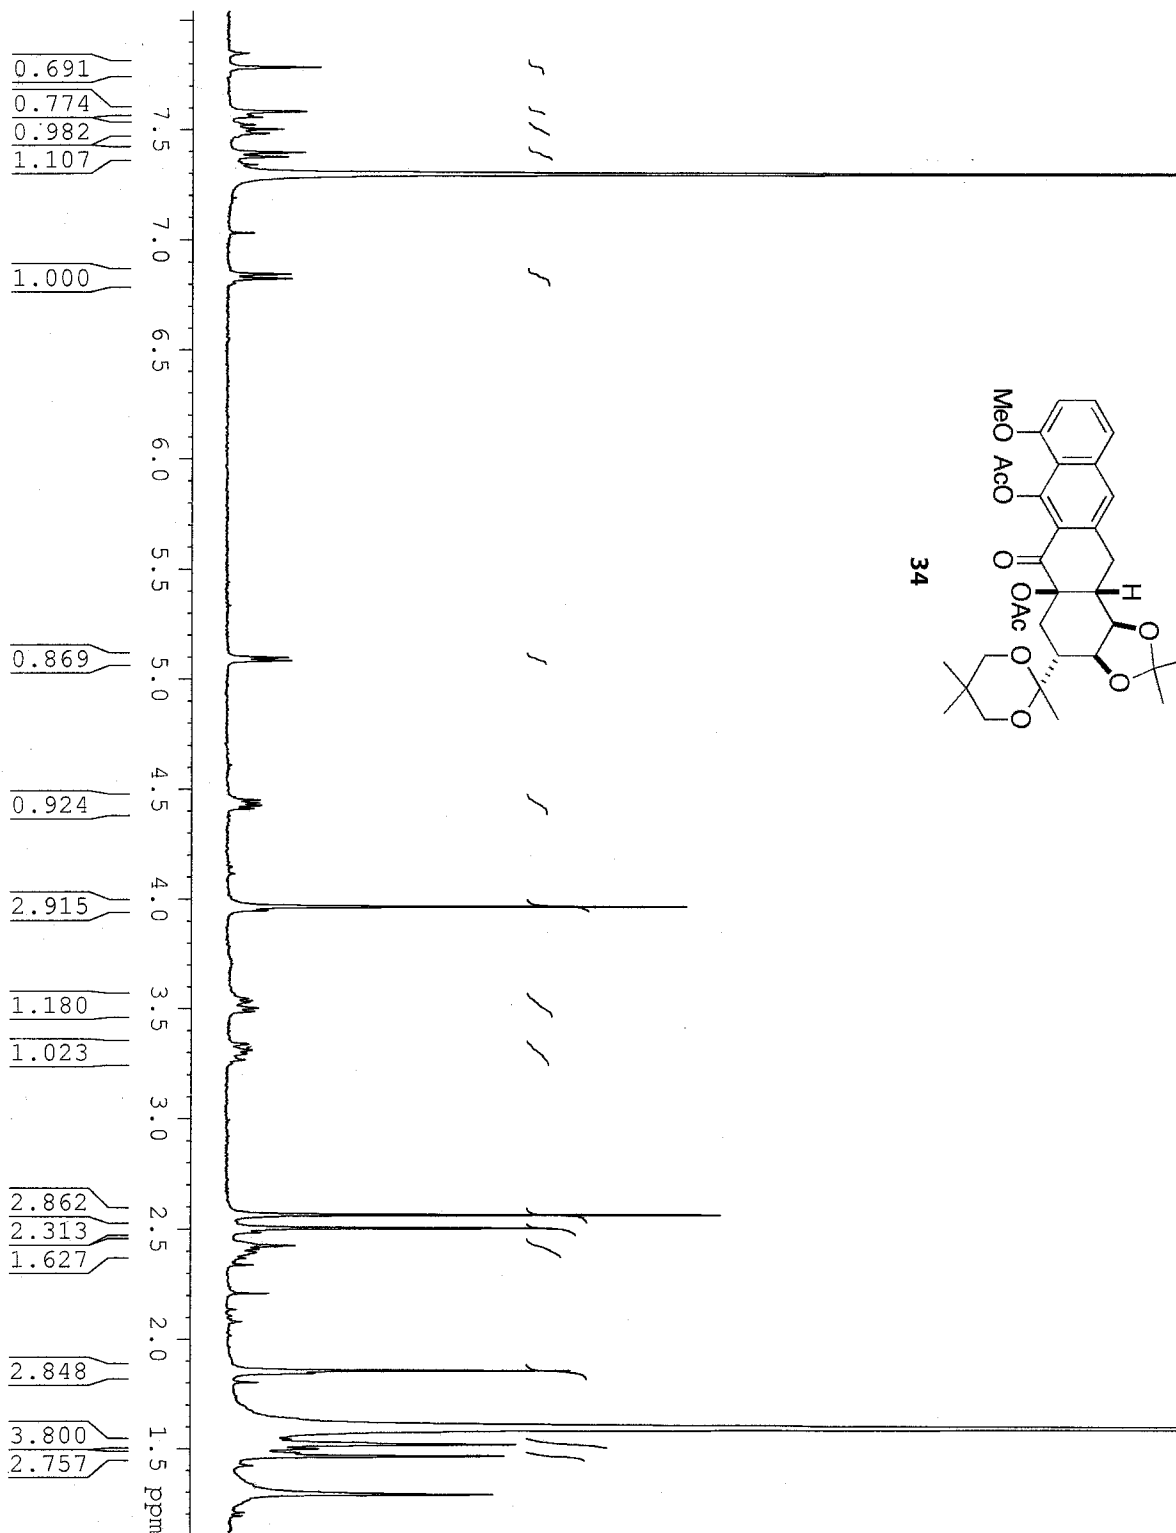

Current Data Parameters  
 NAME qx363y.101  
 EXPNO 1  
 PROCNO 1  
 DU /m  
 USER qing

F2 - Acquisition Parameters  
 Date\_ 20030922  
 Time 14.16  
 INSTRUM dpx400  
 PROBHD 5 mm BBO 2-G  
 PULPROG zg30  
 TD 32768  
 SOLVENT CDCl3  
 NS 157  
 DS 2  
 SWH 5995.204 Hz  
 FIDRES 0.182959 Hz  
 AQ 2.7329011 sec  
 RG 2048  
 DW 83.400 usec  
 DE 6.00 usec  
 TE 300.0 K  
 D1 2.00000000 sec

===== CHANNEL f1 =====  
 NUC1 <sup>1</sup>H  
 P1 11.30 usec  
 PL1 0.00 dB  
 SFO1 400.0126001 MHz

F2 - Processing parameters  
 SI 65536  
 SF 400.0100000 MHz  
 WDW EM  
 SSB 0  
 LB 0.70 Hz  
 GB 0  
 PC 1.00

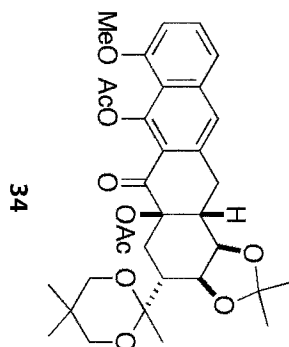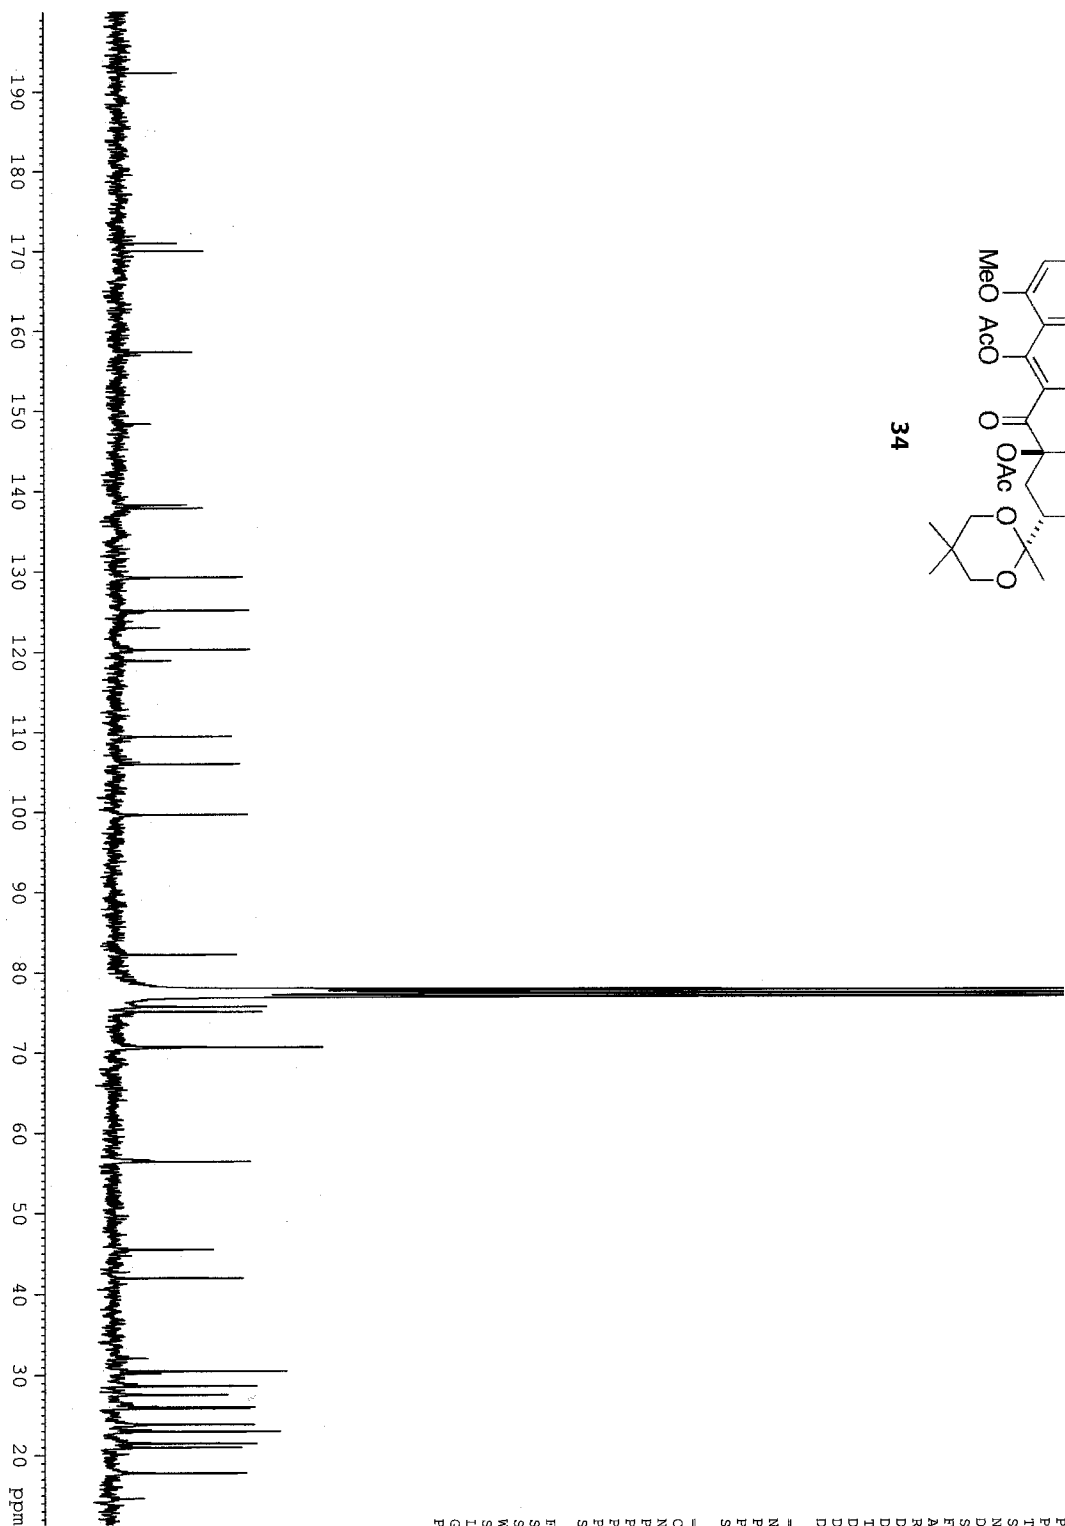

Current Data Parameters  
 NAME qx358w.101  
 EXPNO 2  
 PROCNO 1  
 DU /m  
 USER qing

F2 - Acquisition Parameters  
 Date\_ 20030908  
 Time 22.26  
 INSTRUM dpx300  
 PROBD 5 mm QNP 1H  
 PULPROG zgpg30  
 TD 65536  
 SOLVENT  
 NS 20084  
 DS 2  
 SWH 18832.393 Hz  
 FIDRES 0.287360 Hz  
 AQ 1.7400308 sec  
 RG 8192  
 DW 26.350 usec  
 DE 6.00 usec  
 TE 300.0 K  
 D1 0.00300000 sec  
 D11 0.03000000 sec  
 D12 0.0002000 sec

CHANNEL f1  
 NUC1 13C  
 P1 7.60 usec  
 PL1 -3.00 dB  
 SFO1 75.4756431 MHz

CHANNEL f2  
 CPDPRG2 waltz16  
 NUC2 1H  
 PCPD2 80.00 usec  
 PL2 2.00 dB  
 PL12 17.55 dB  
 PL13 19.00 dB  
 SFO2 300.1315007 MHz

F2 - Processing parameters  
 SI 131072  
 SF 75.4677190 MHz  
 WDW EM  
 SSB 0  
 LB 3.00 Hz  
 GB 0  
 PC 1.40
